# Supplementary material for: Pooled analysis of epigenome-wide association studies of food consumption in KORA, TwinsUK and LLS
Source: Springer Nature journal article supplement (doi:10.1007/s00394-022-03074-9), 2022-12-26

**Article title:** Pooled analysis of epigenome-wide association studies of food consumption in KORA, TwinsUK and LLS

**Journal name:** European Journal of Nutrition

**Author names:** Fabian Hellbach, Lucy Sinke, Ricardo Costeira, Sebastian-Edgar Baumeister, Marian Beekman, Panayiotis Louca, Emily R Leeming, Olatz Mompeo, Sarah Berry, Rory Wilson, Nina Wawro, Dennis Freuer, Hans Hauner, Annette Peters, Juliane Winkelmann, Wolfgang Koenig, Christa Meisinger, Melanie Waldenberger, Bas Heijmans, Eline Slagboom, Jordana T Bell, Jakob Linseisen

**Corresponding Author:** Fabian Hellbach<sup>1,2</sup>

**Email:** [fabian.hellbach@med.uni-augsburg.de](mailto:fabian.hellbach@med.uni-augsburg.de)

<sup>1</sup>Institute for Medical Information Processing, Biometry, and Epidemiology; Medical Faculty; Ludwig-Maximilian University Munich; Marchioninstr. 15, 81377 Munich, Germany

<sup>2</sup>Epidemiology; Faculty of Medicine; University of Augsburg; University Hospital Augsburg; Stenglinstraße 2, 86156 Augsburg; Germany

**Caption:** Heterogeneity statistics for every food group analyzed. Shown are P-value distribution of the Q-Heterogeneity measure (left),  $I^2$  values (right) and estimated tau-values (bottom)

Fig 77

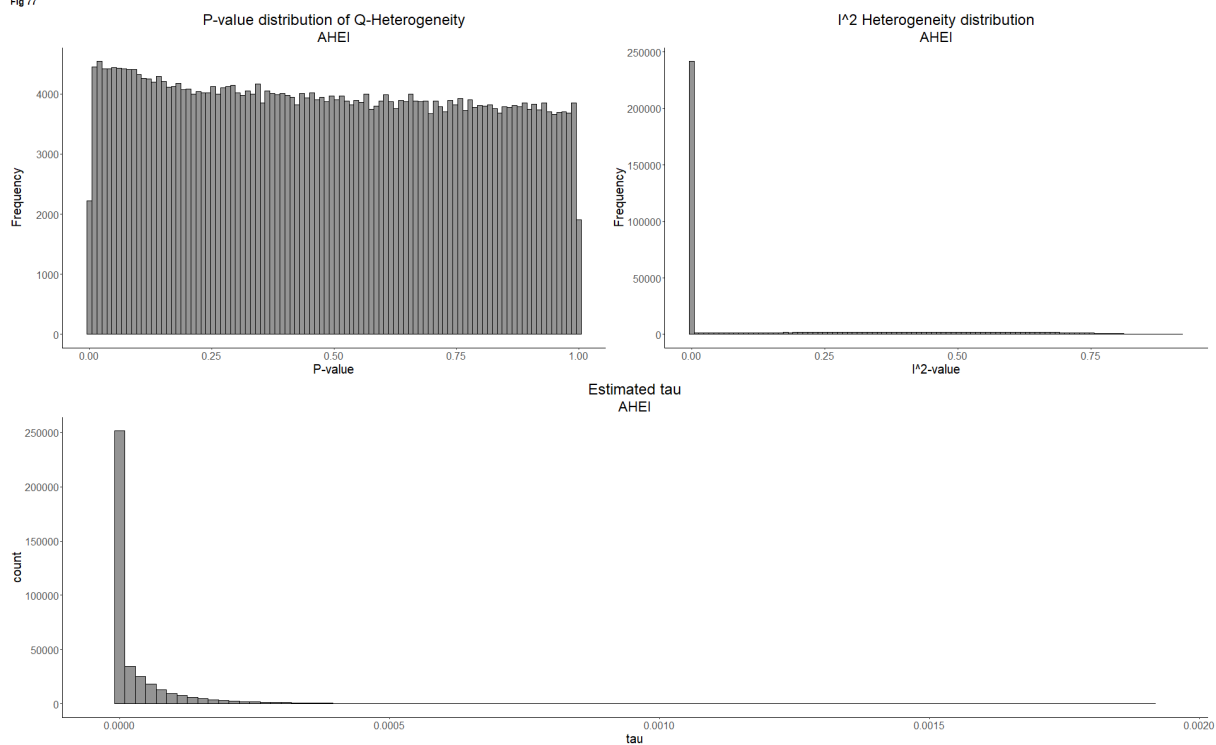

Fig 78

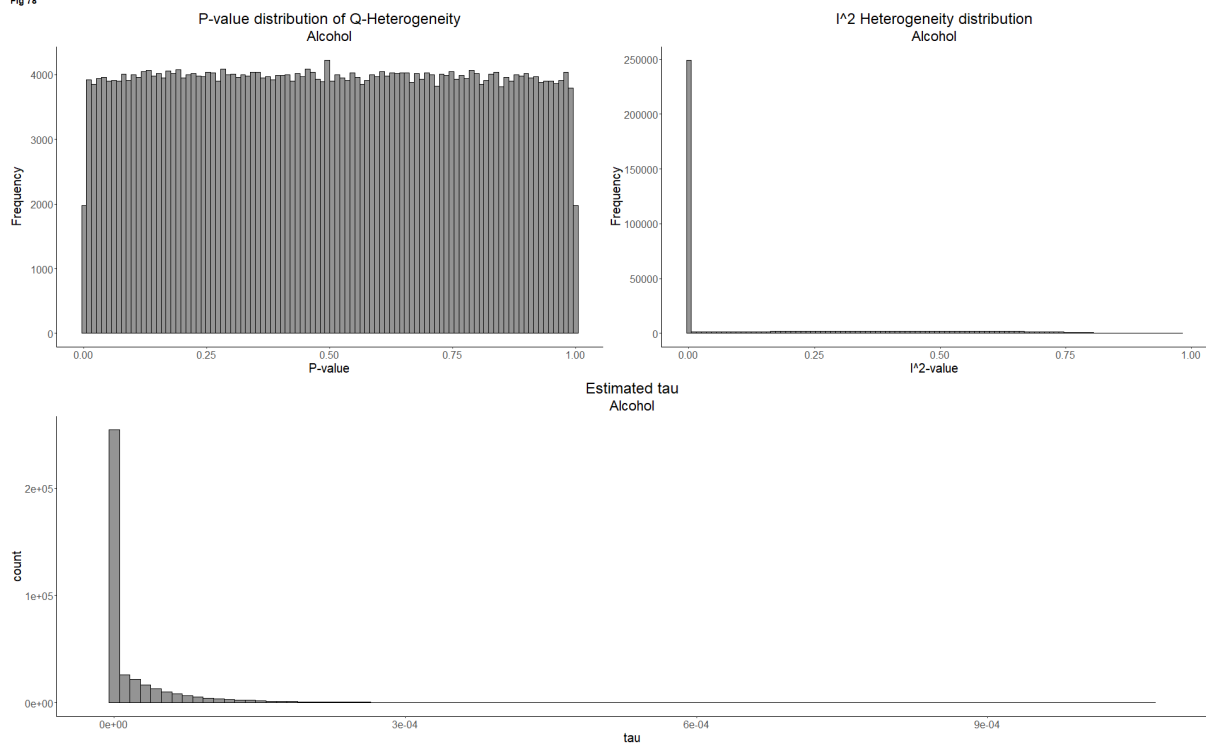

Fig 79

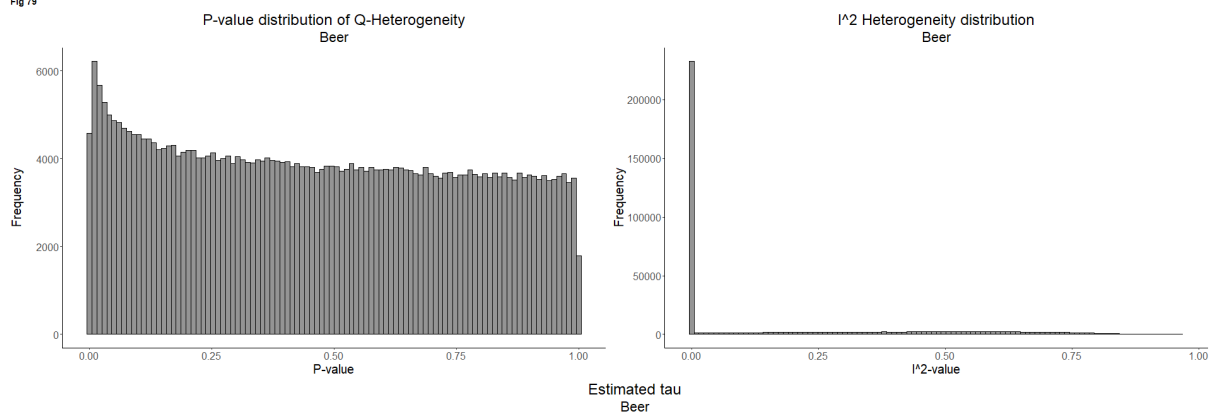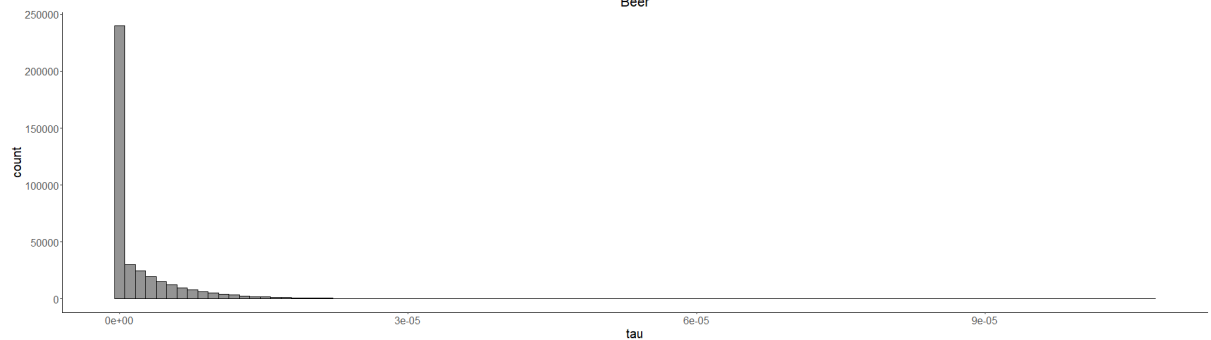

Fig 80

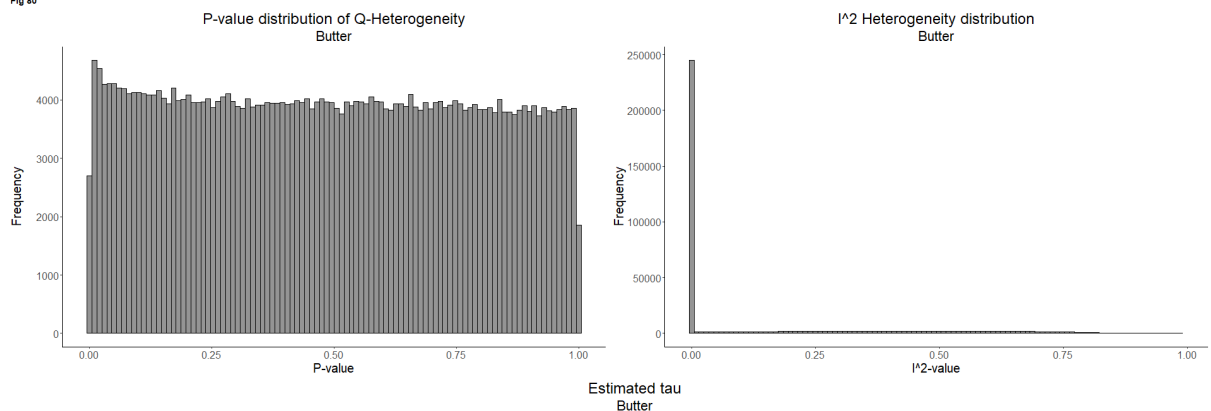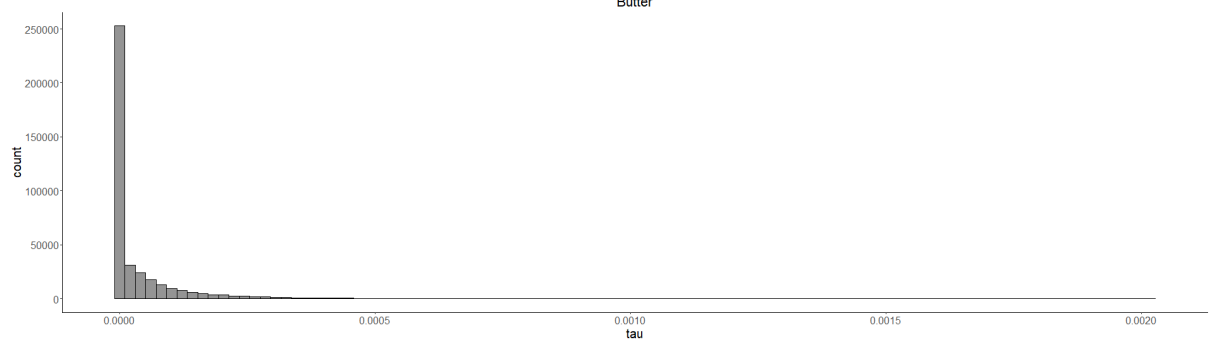

Fig 81

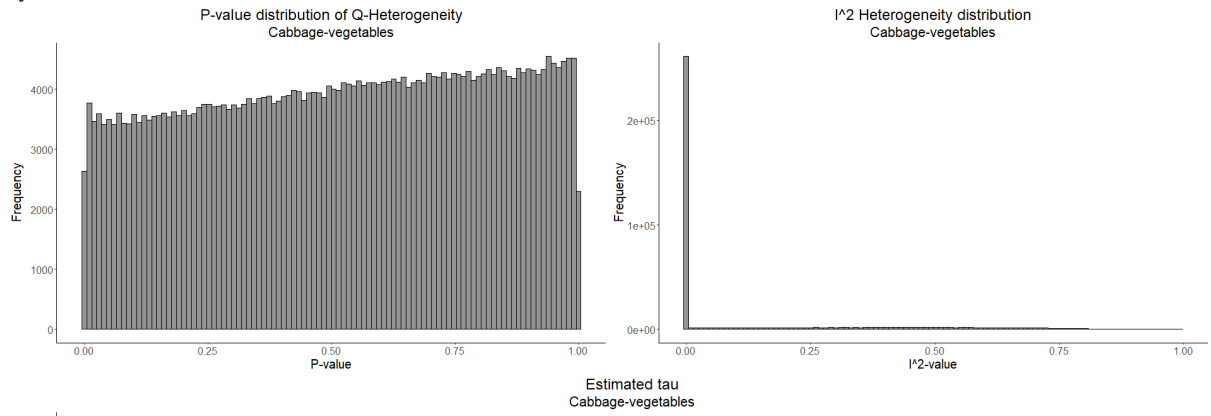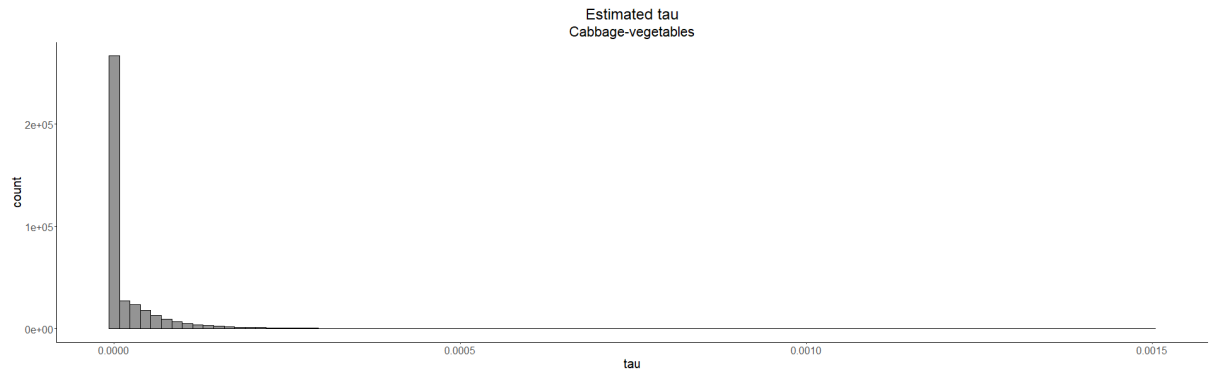

Fig 82

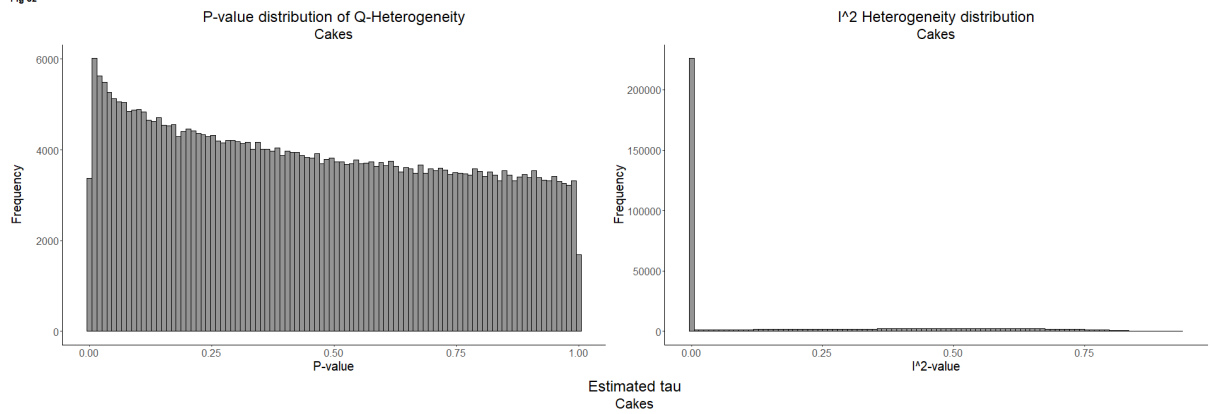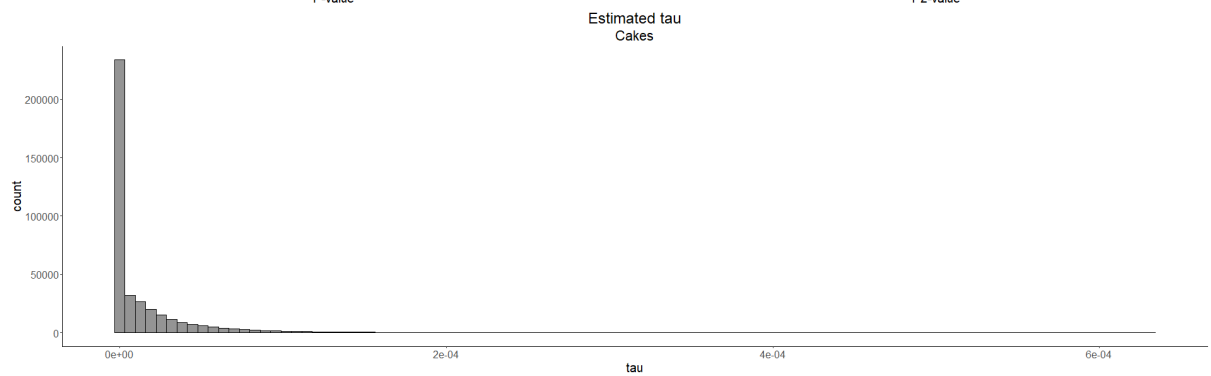

Fig 83

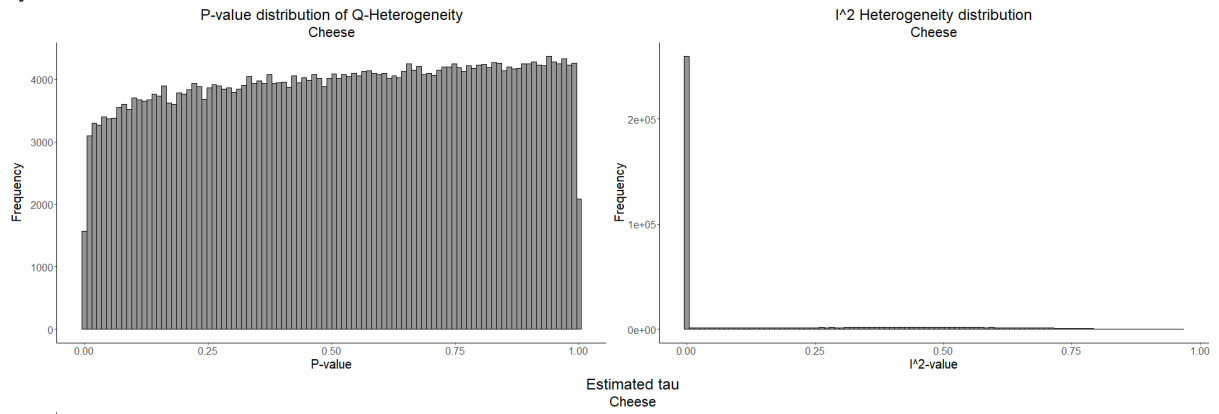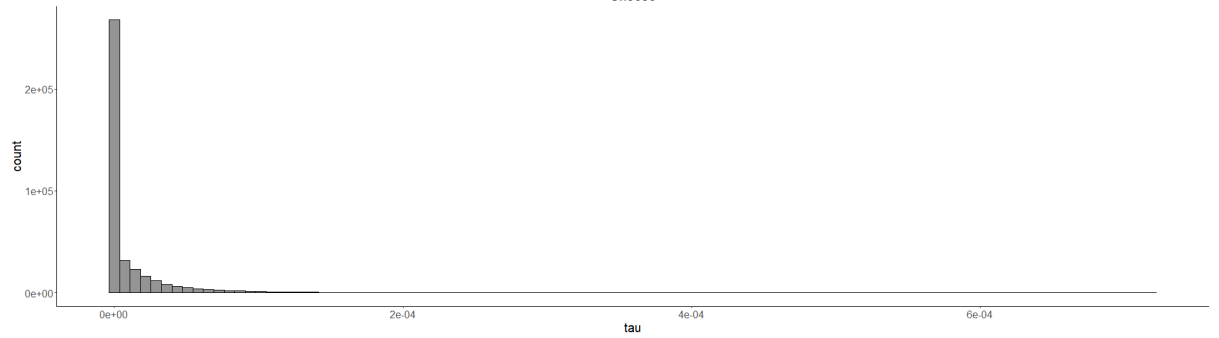

Fig 84

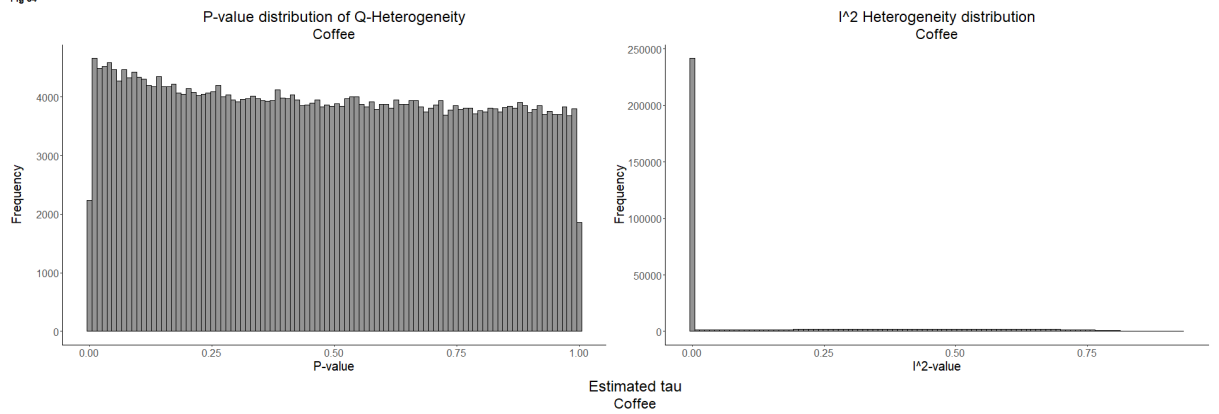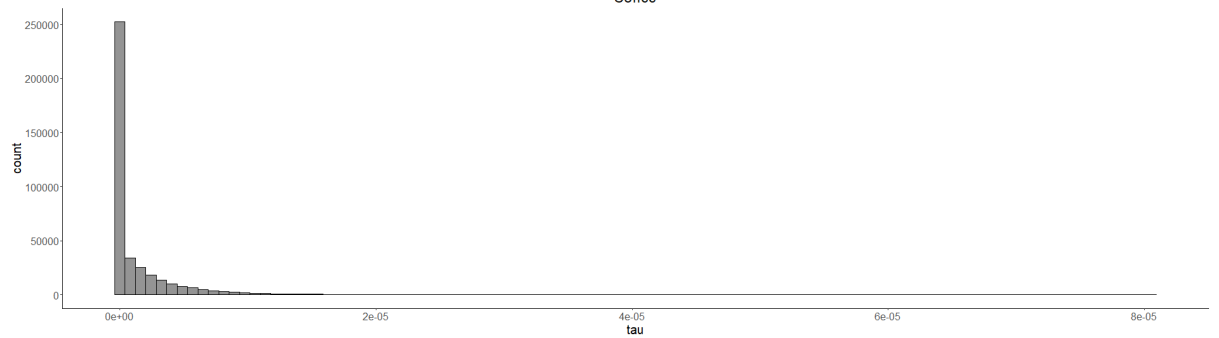

Fig 85

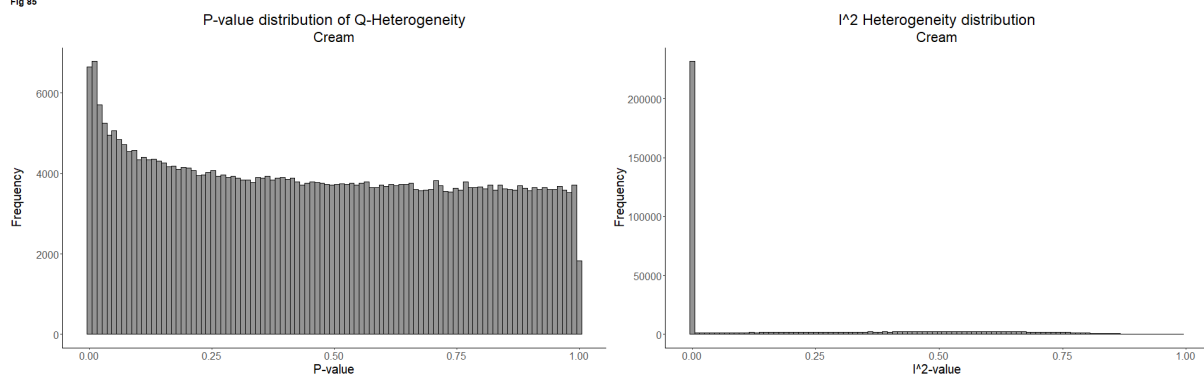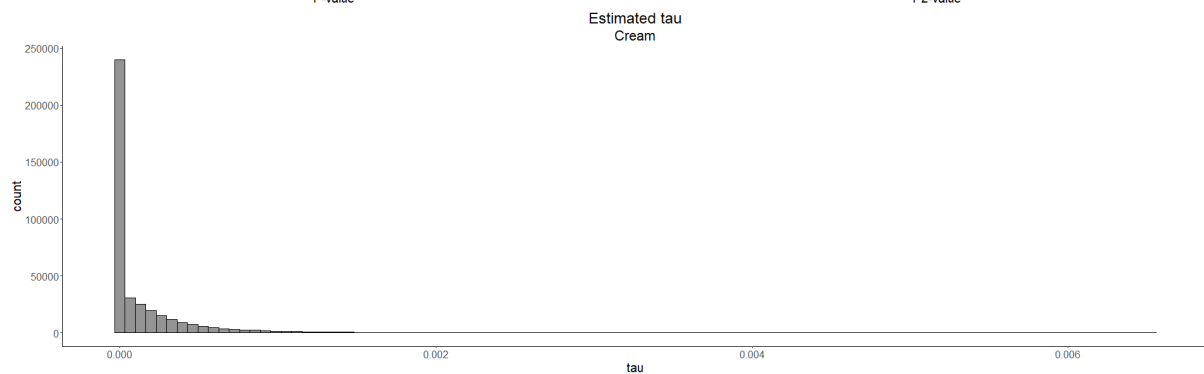

Fig 86

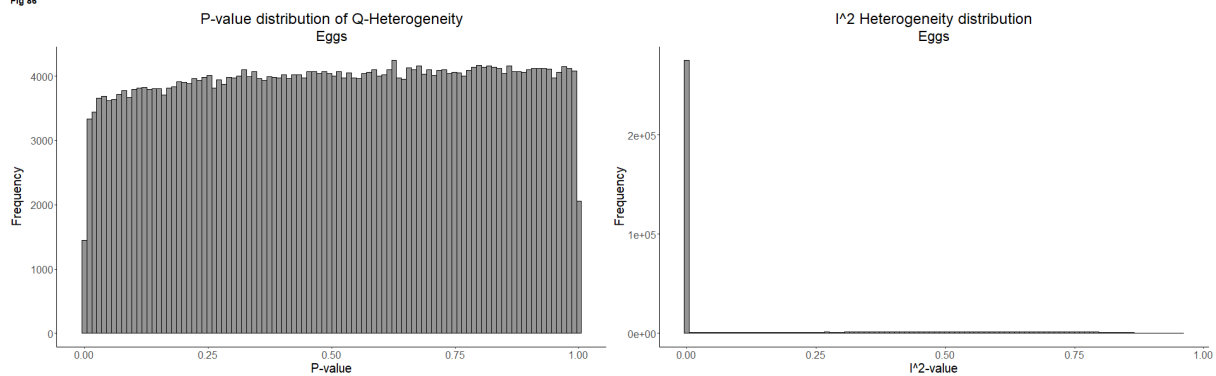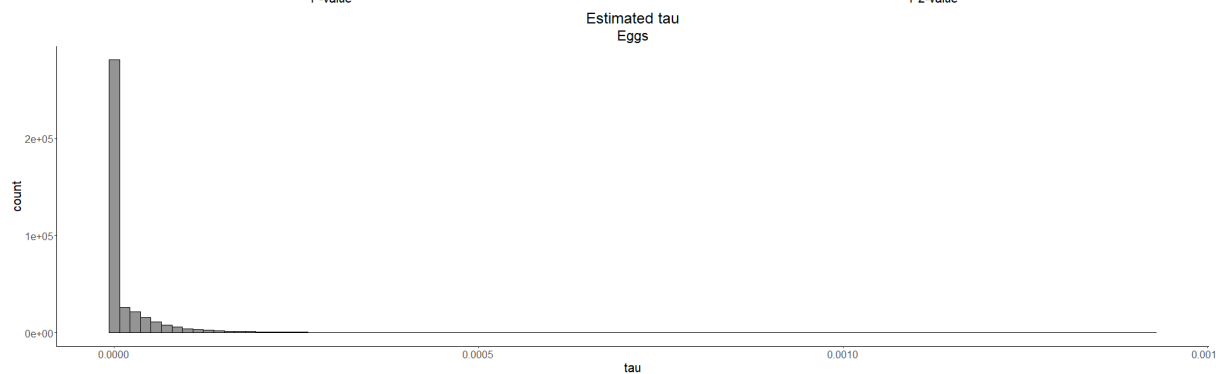

Fig 87

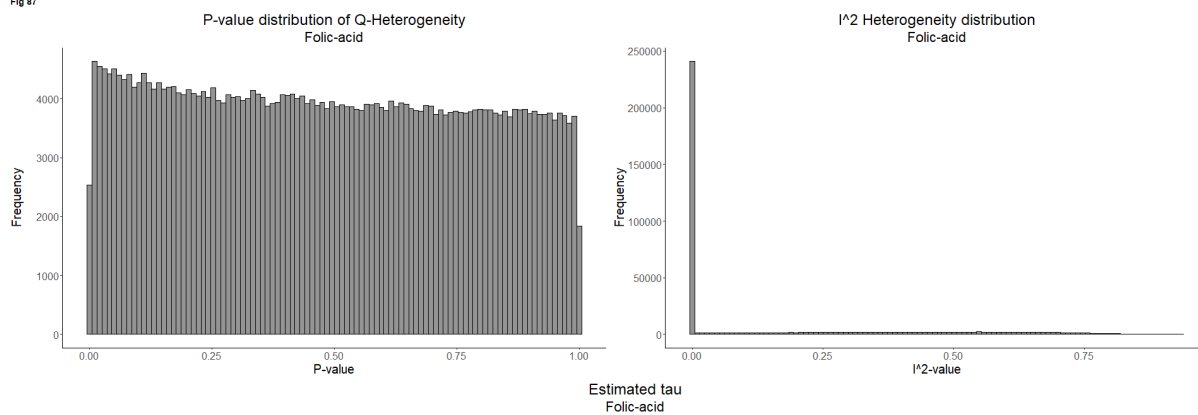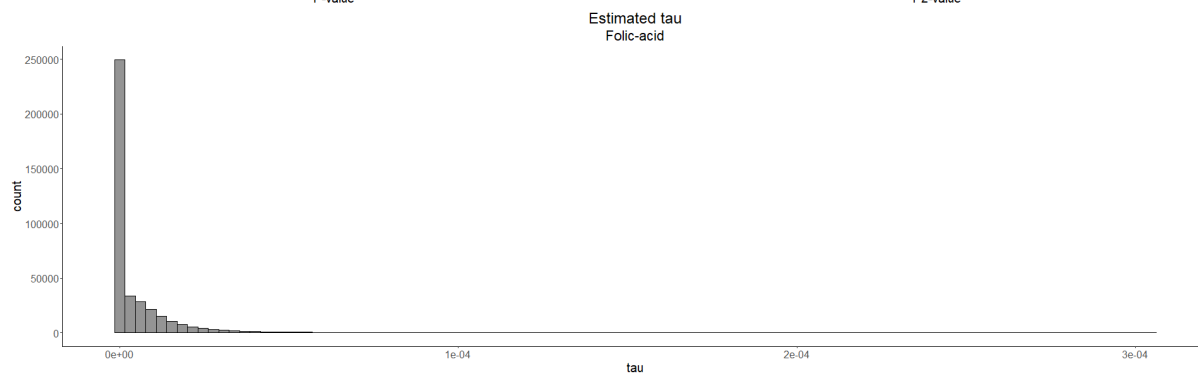

Fig 88

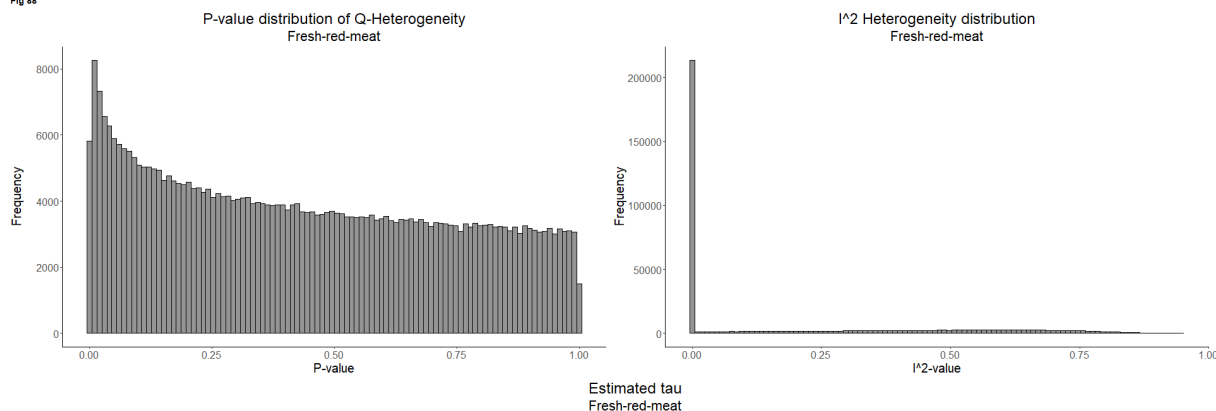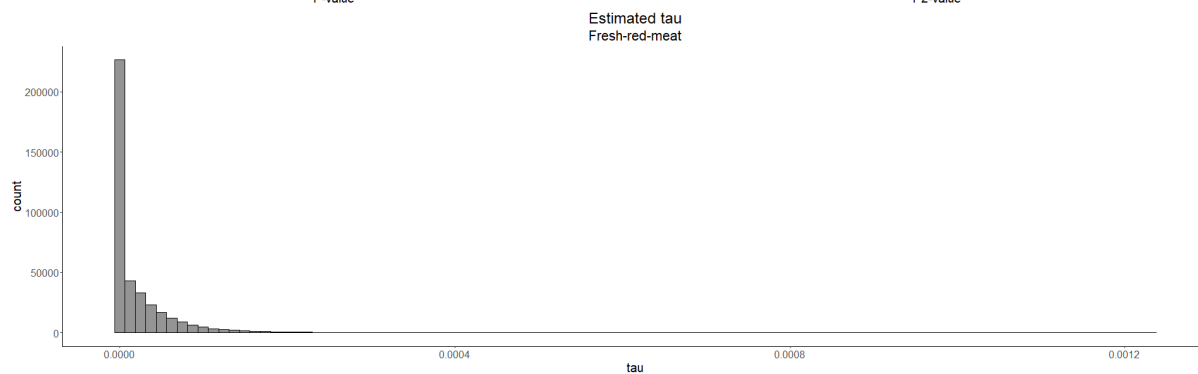

Fig 89

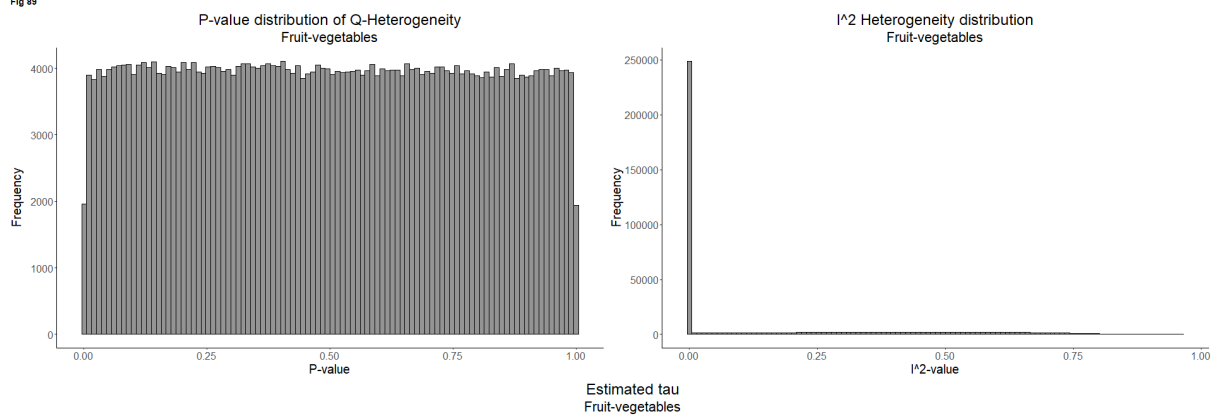

Fig 90

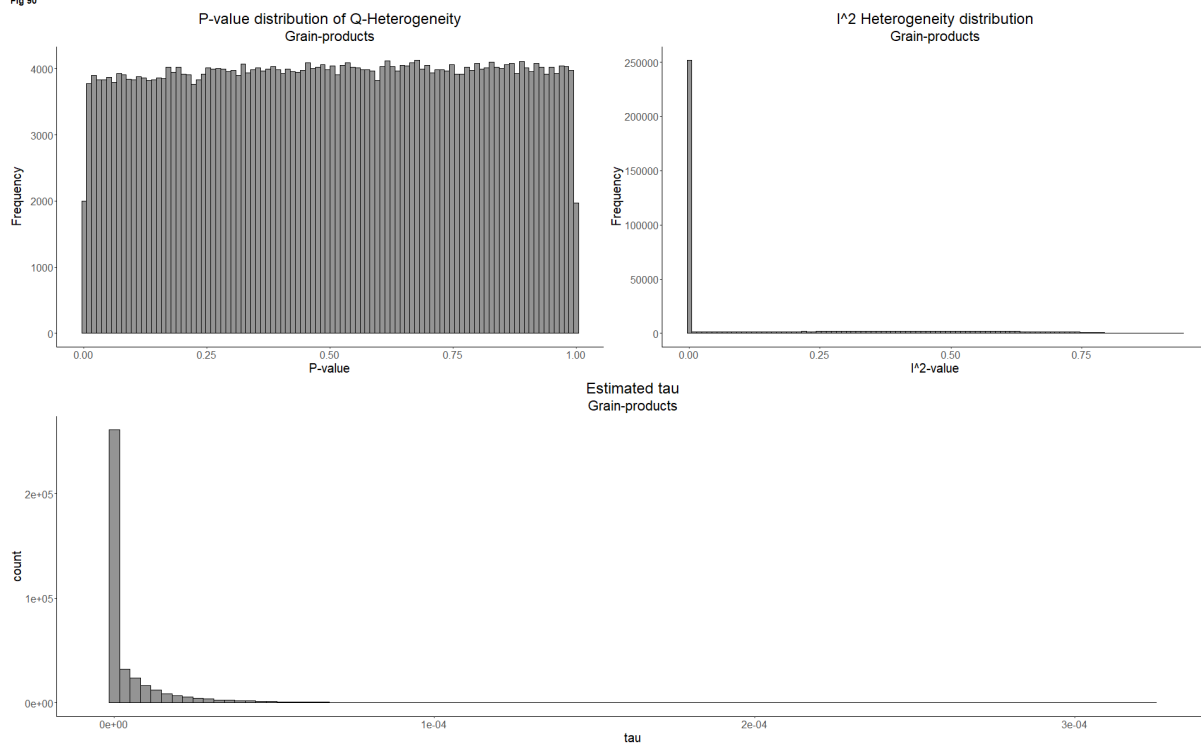



Fig 91

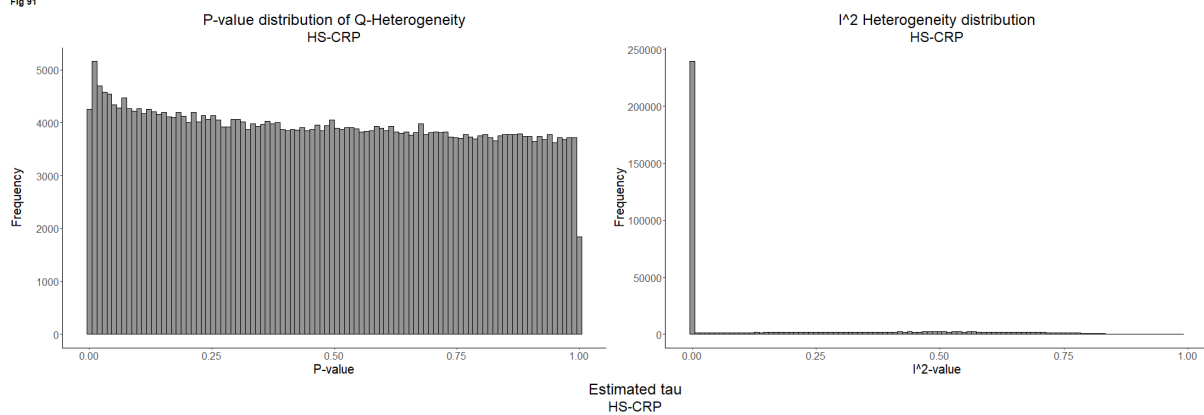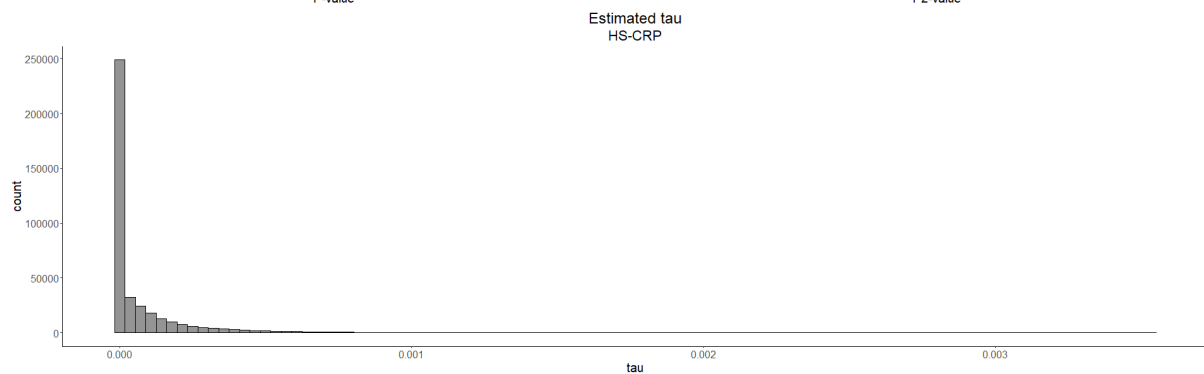

Fig 92

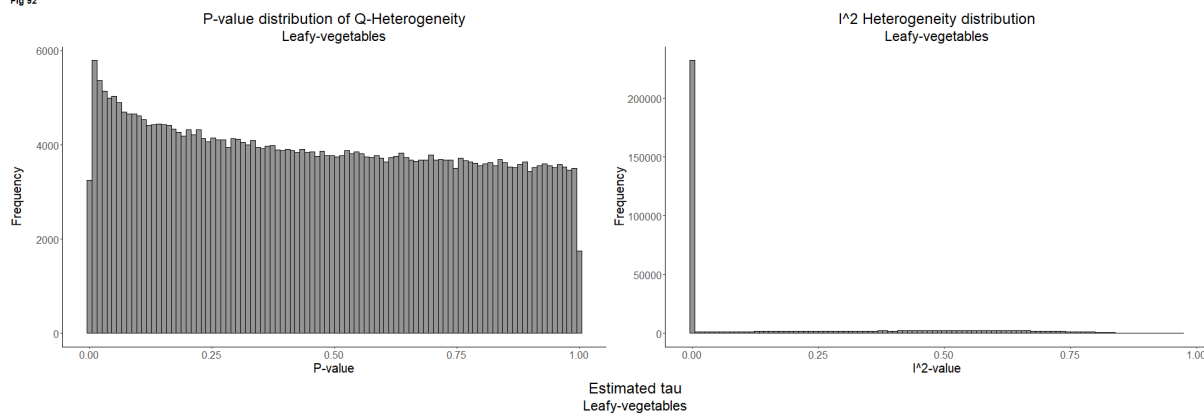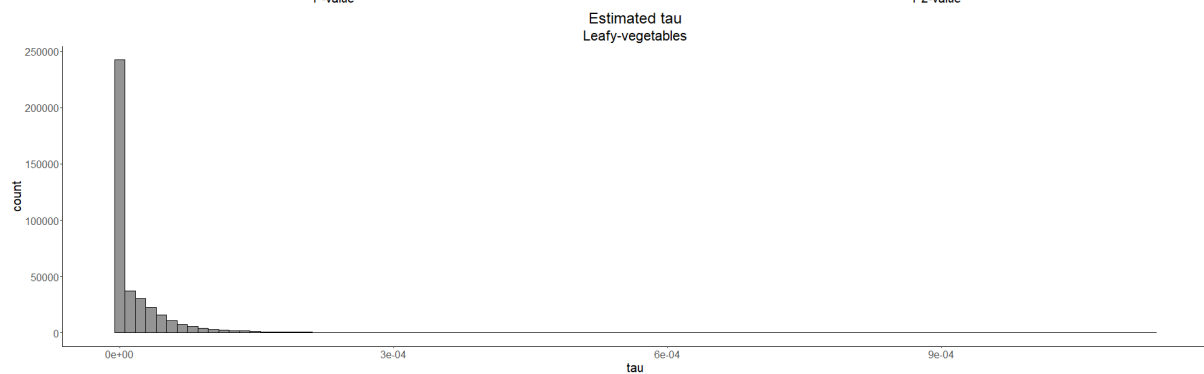

Fig 93

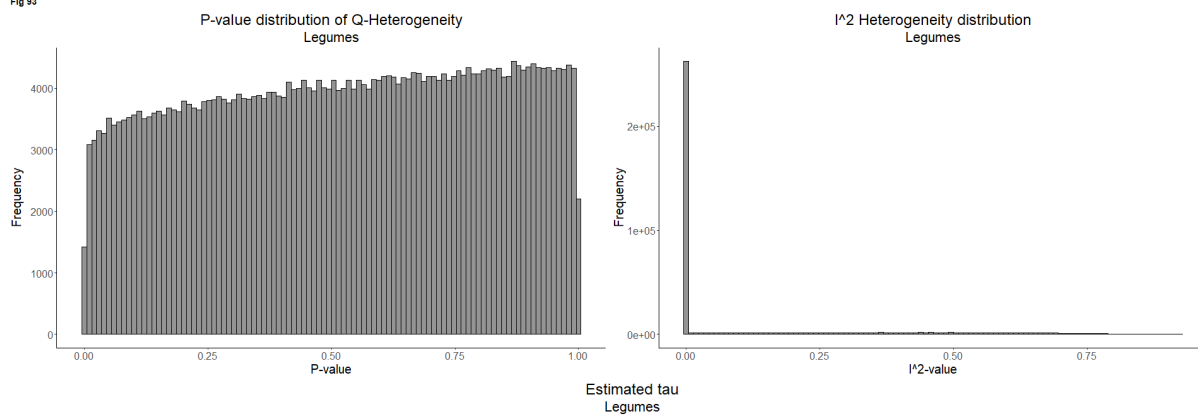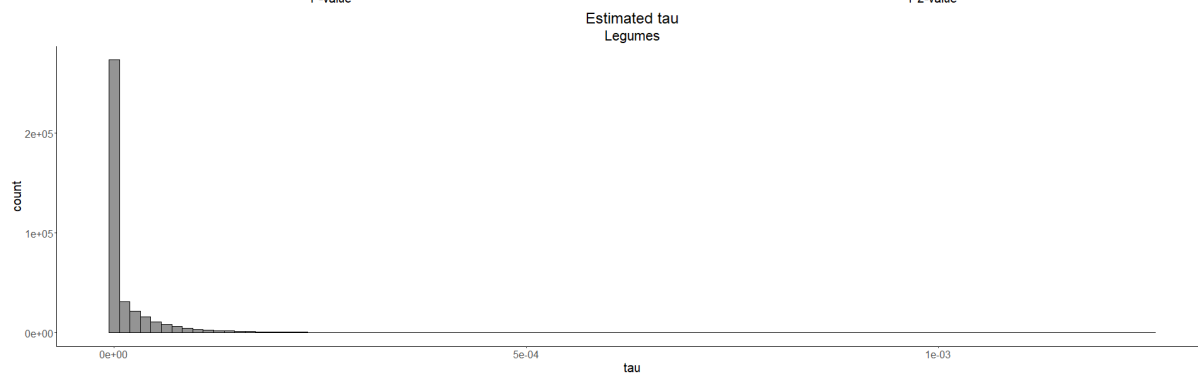

Fig 94

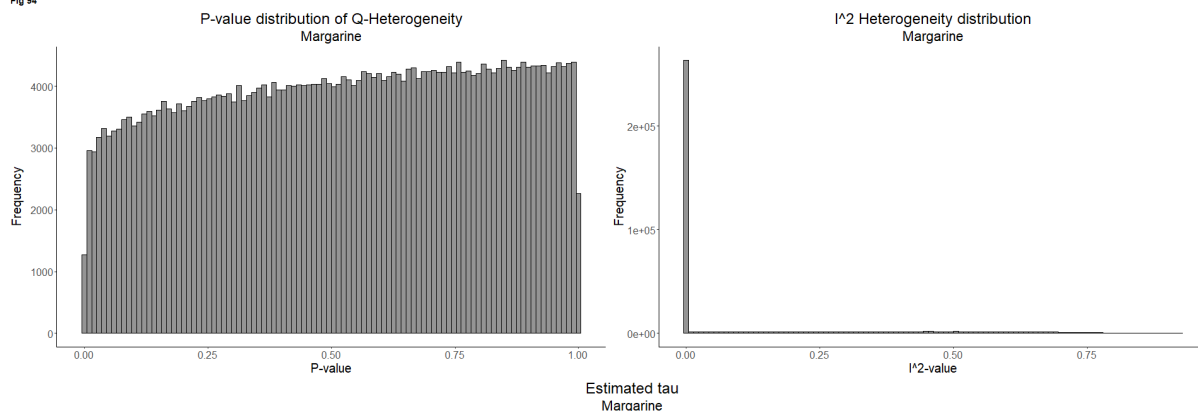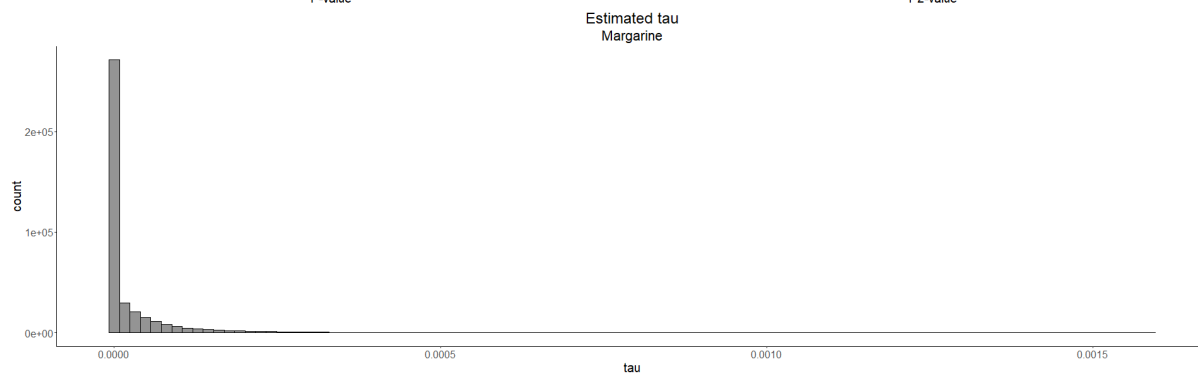

Fig 95

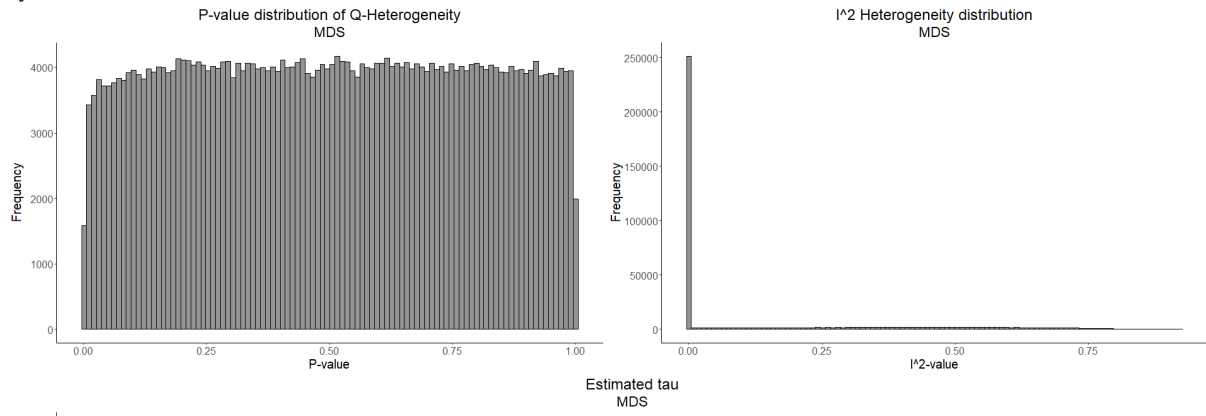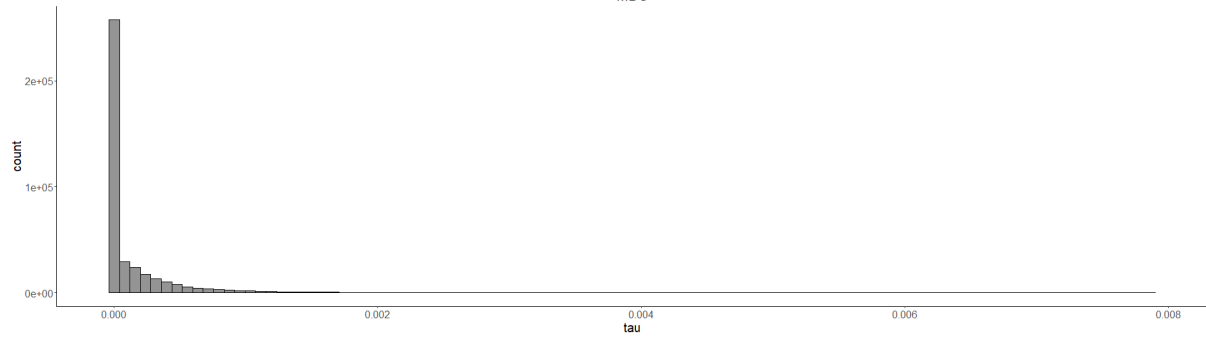

Fig 96

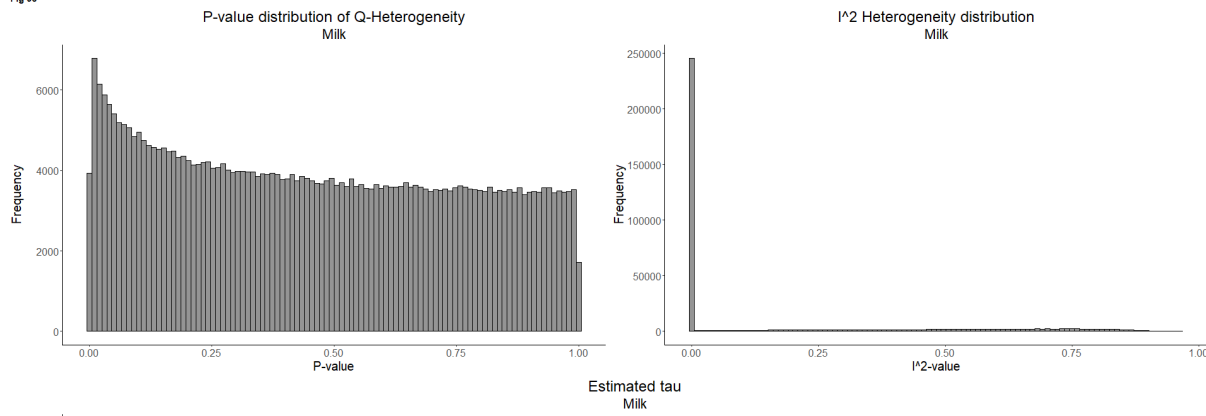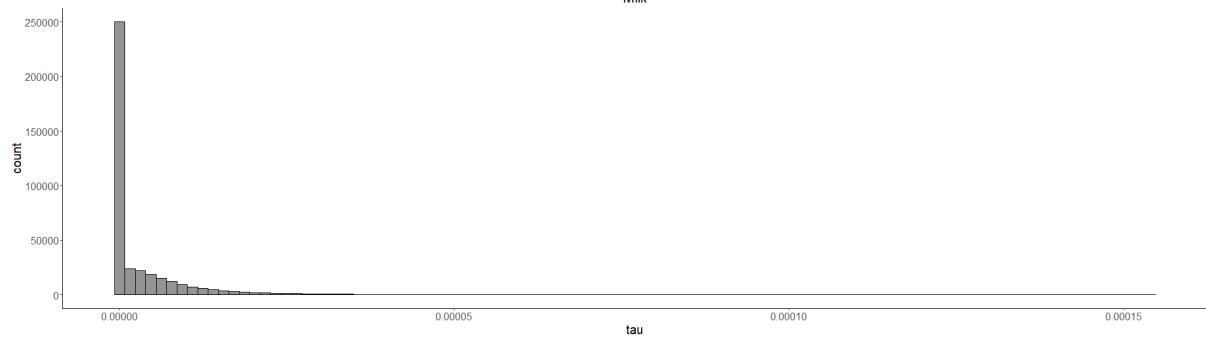

Fig 97

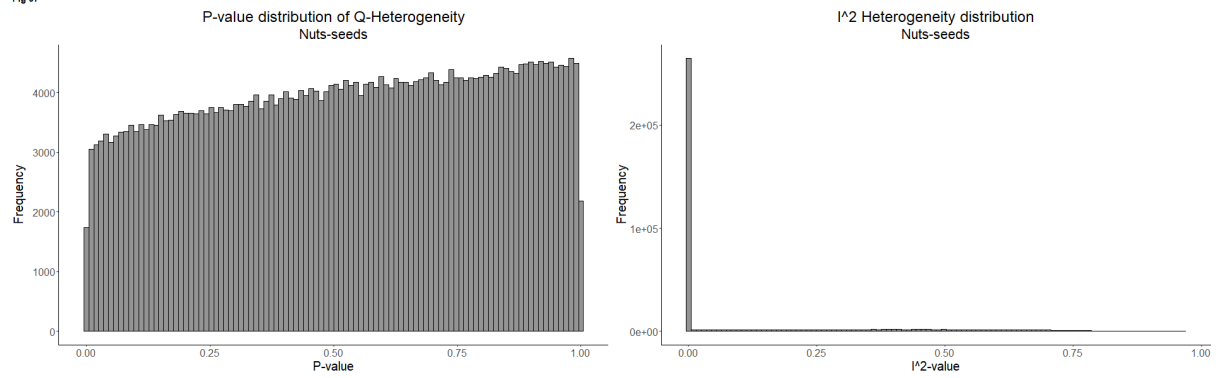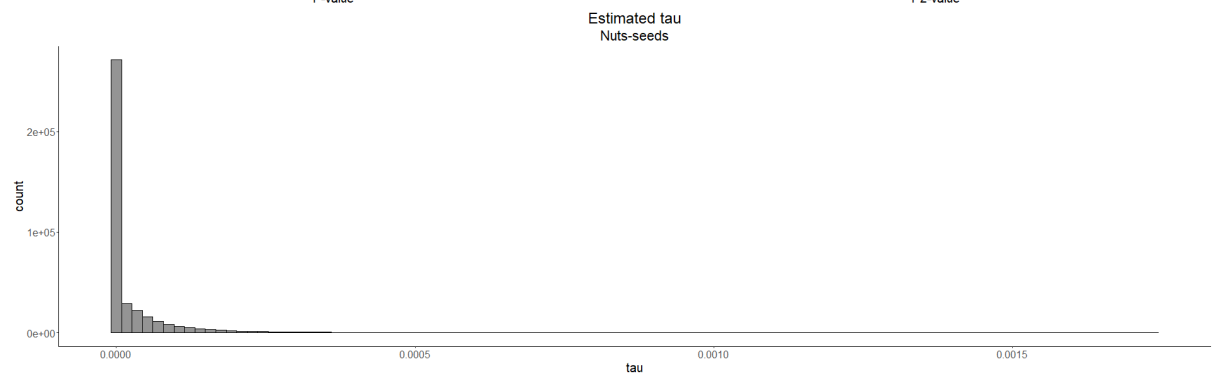

Fig 98

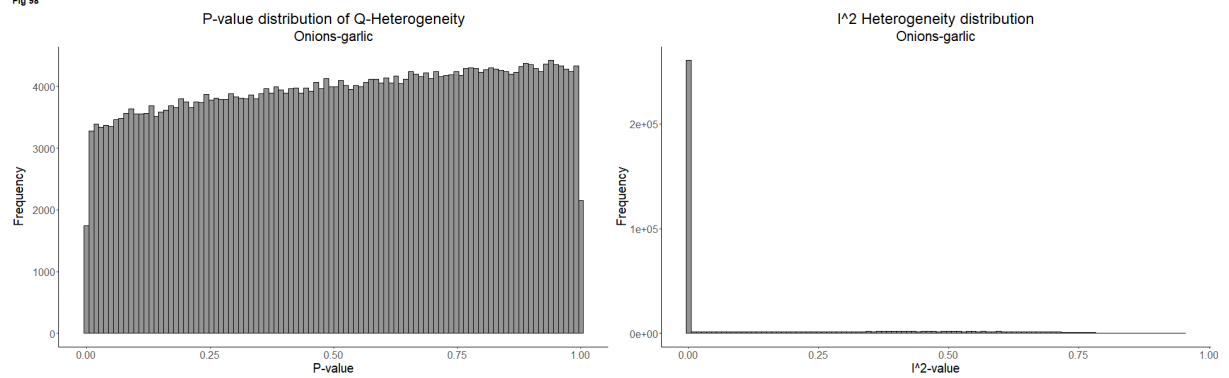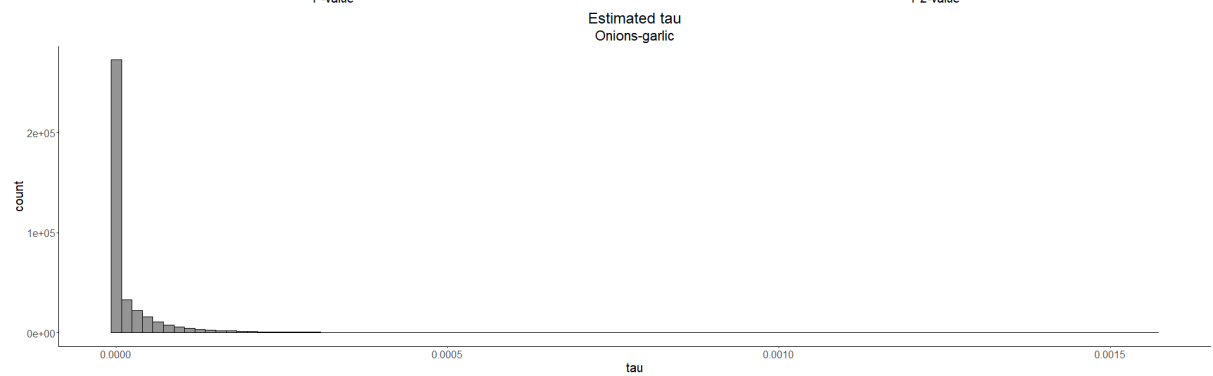

Fig 99

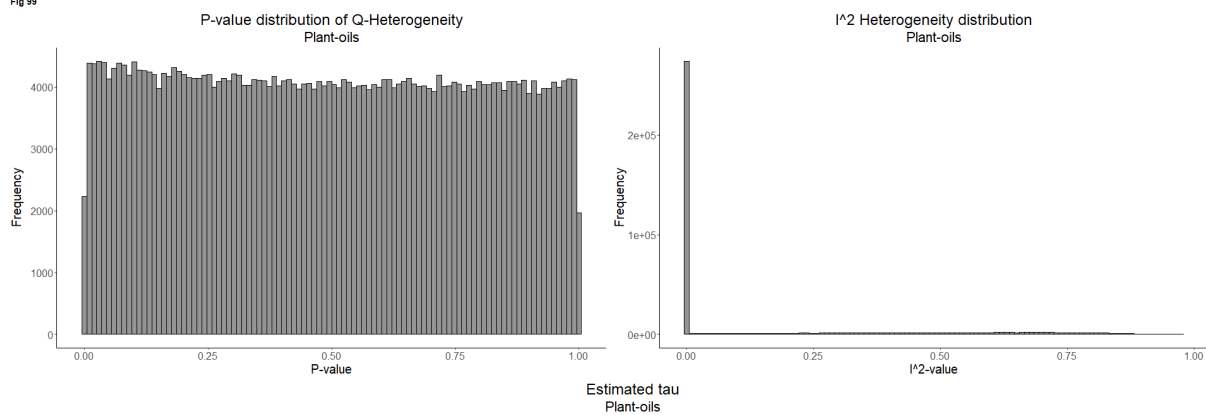

Fig 100

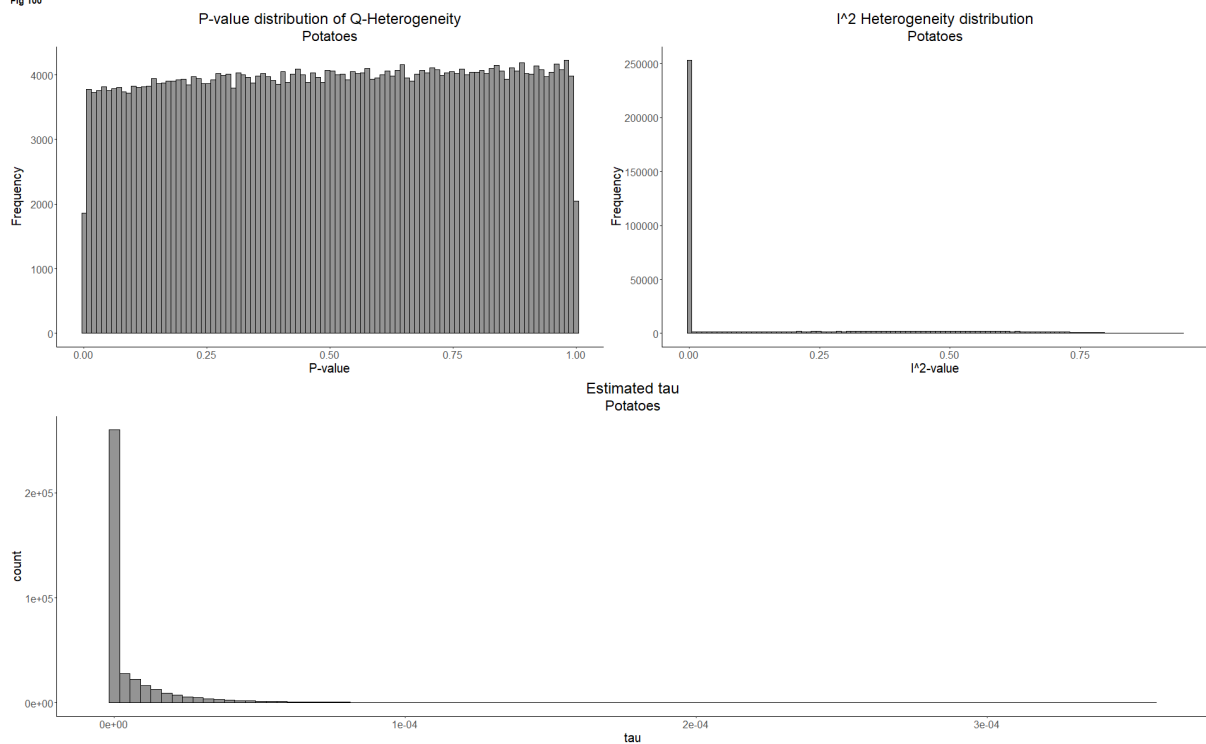

Fig 101

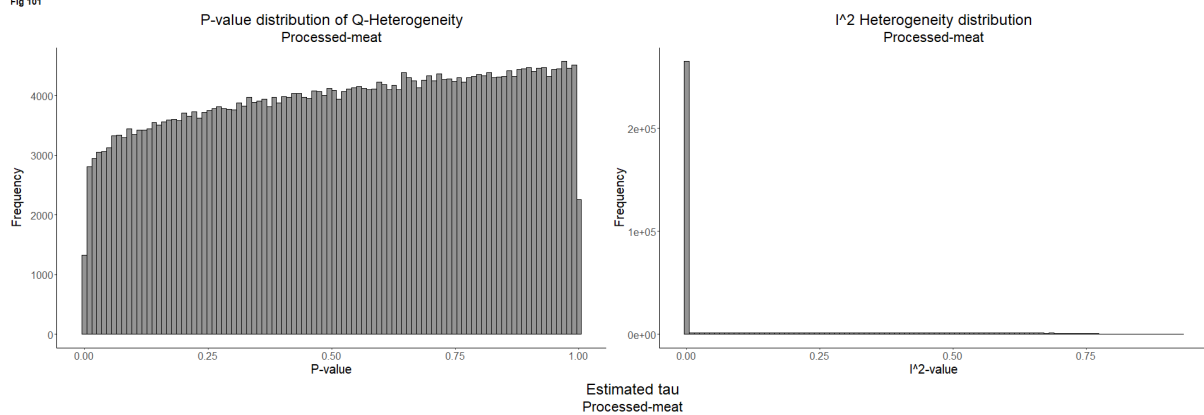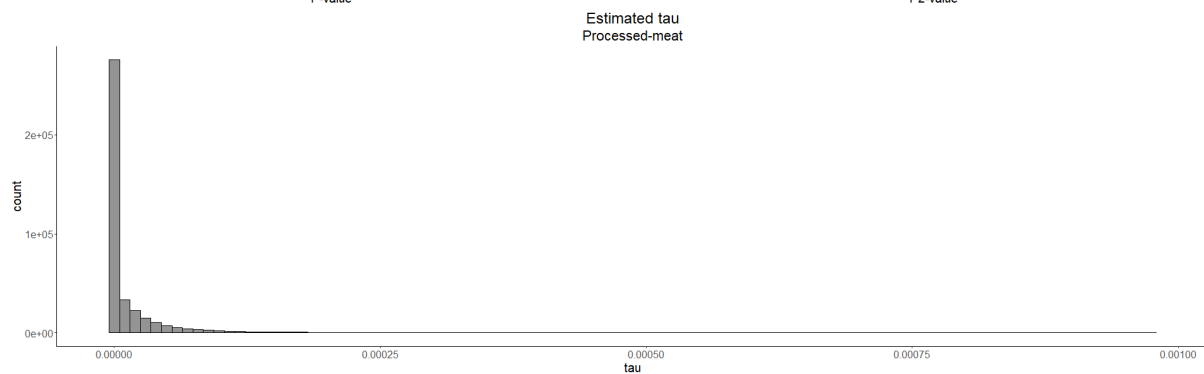

Fig 102

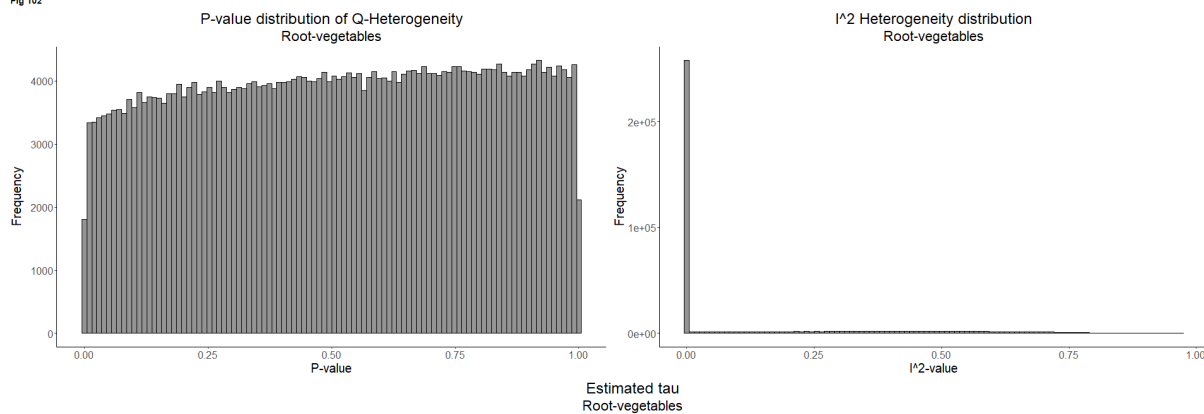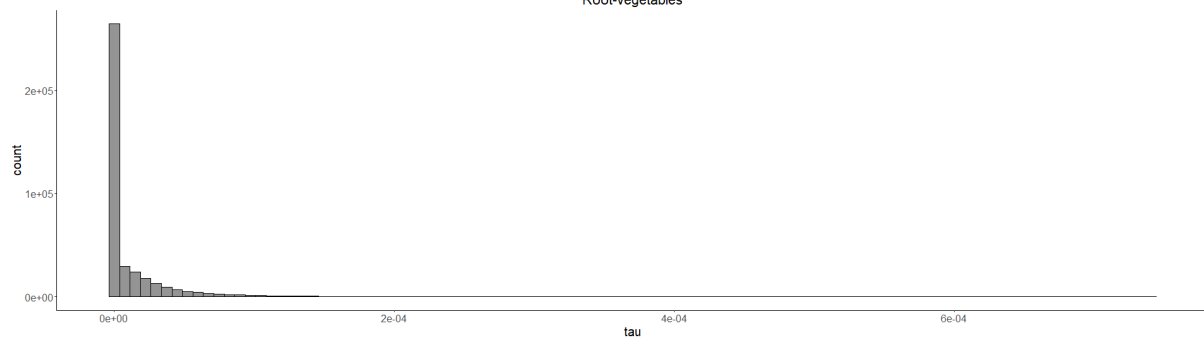

Fig 103

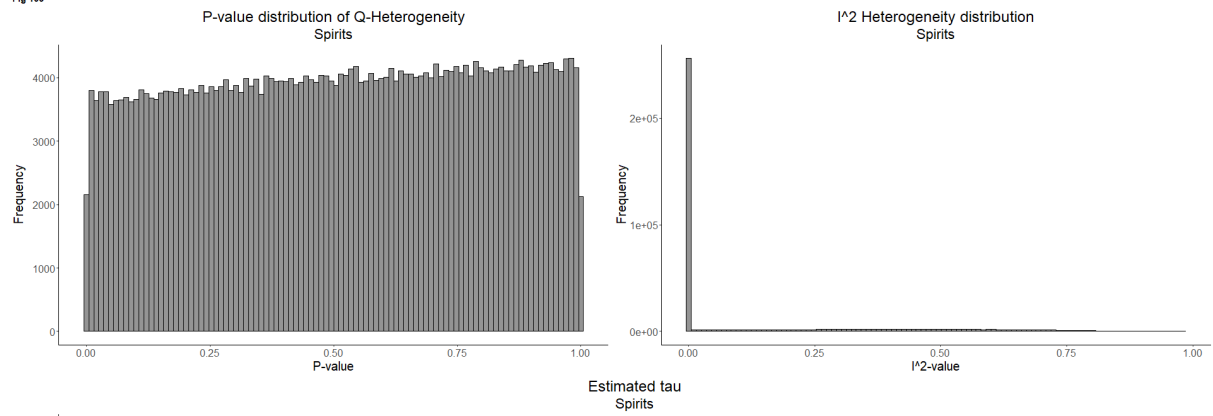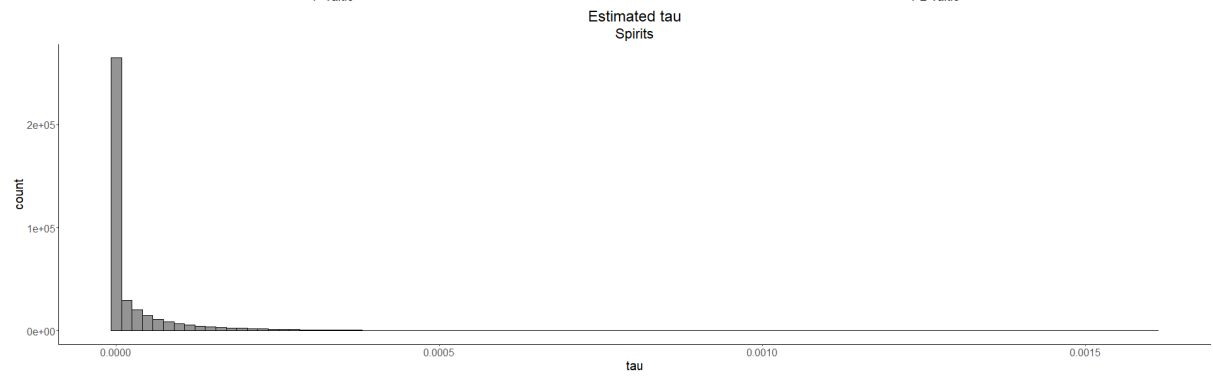

Fig 104

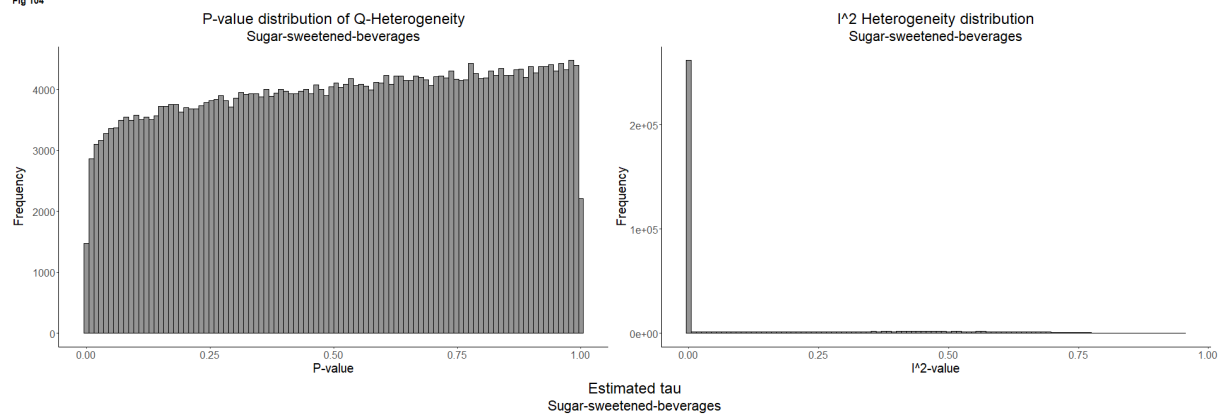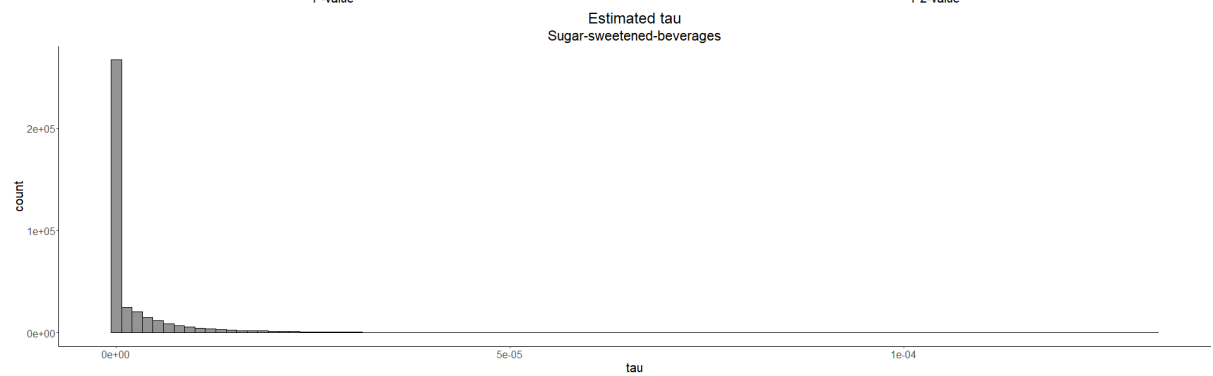

Fig 105

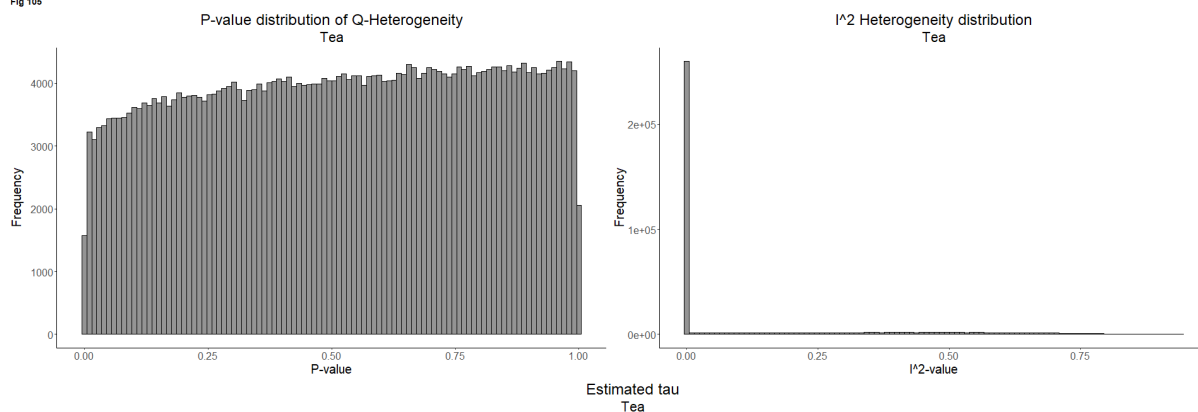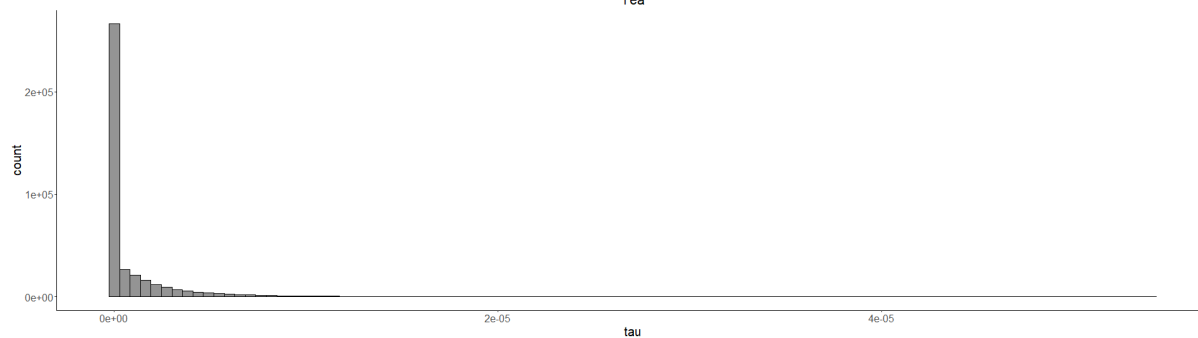

Fig 106

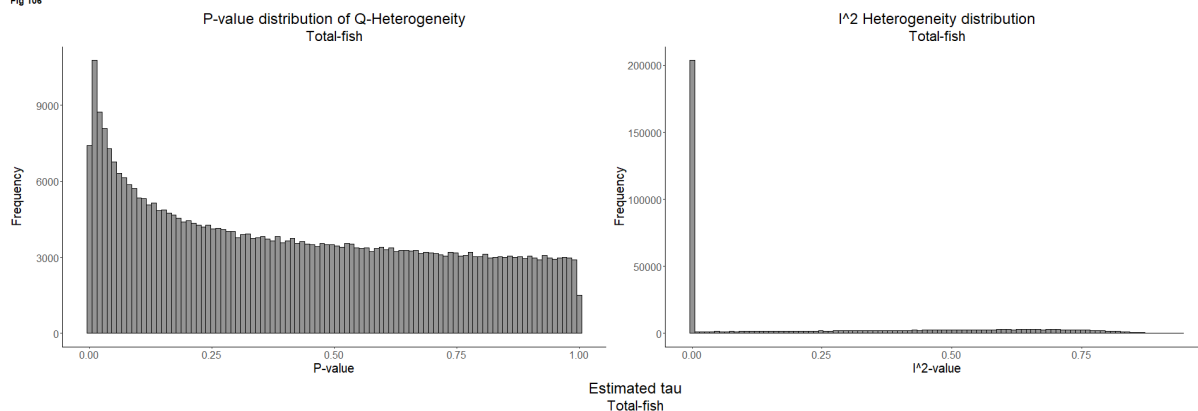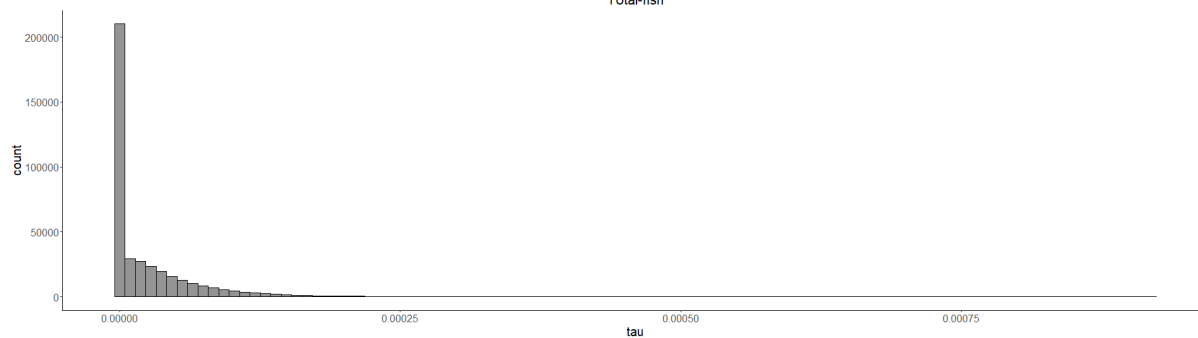



Fig 107

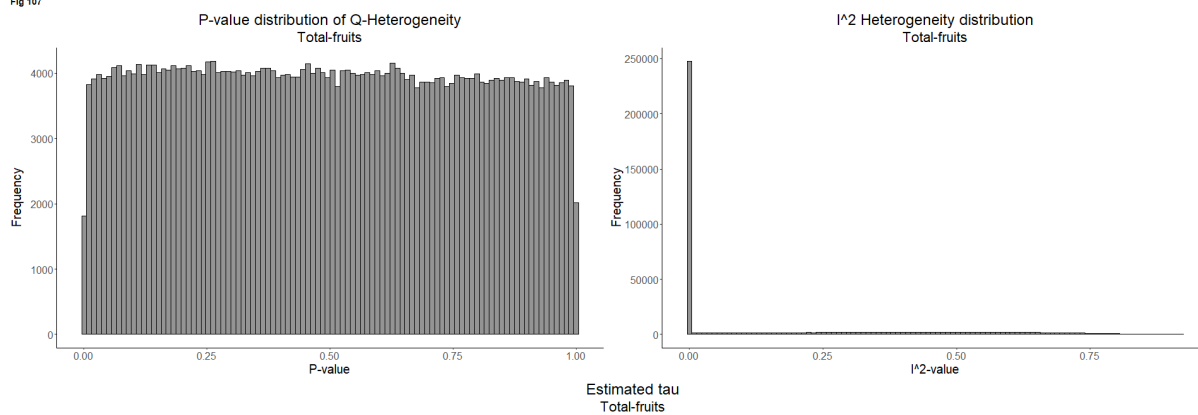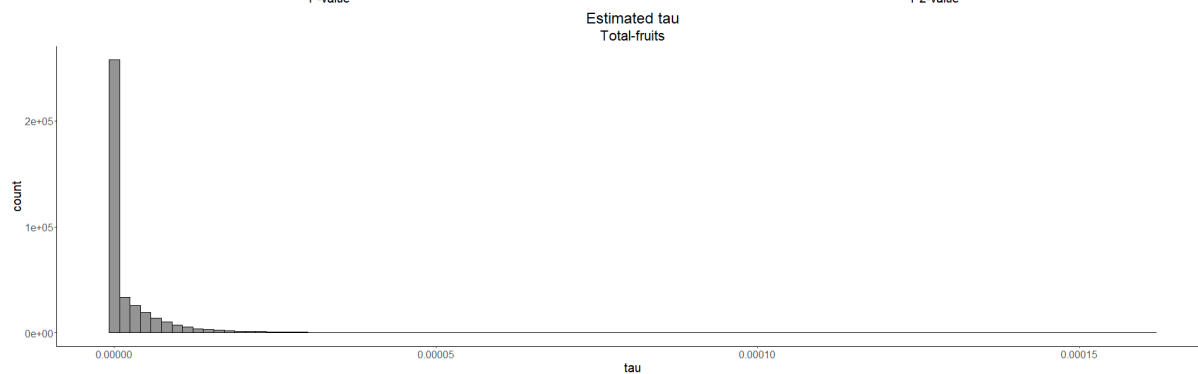

Fig 108

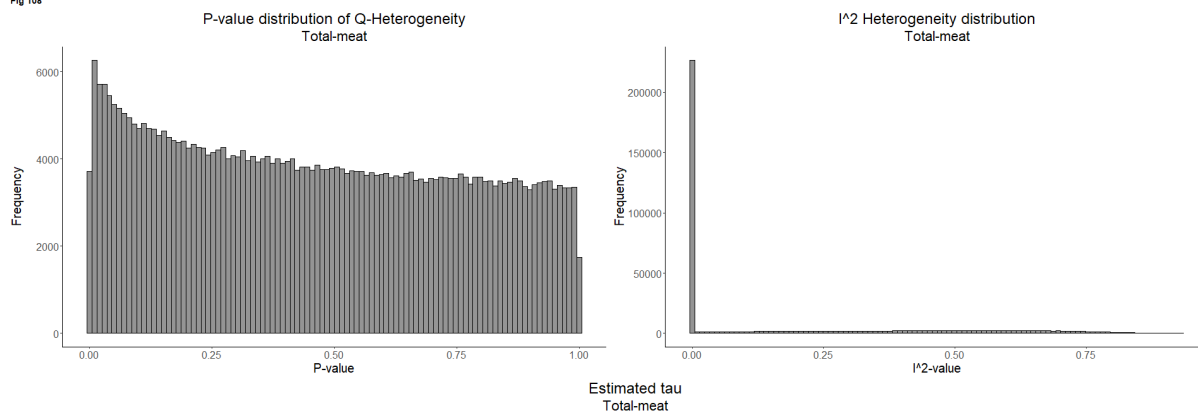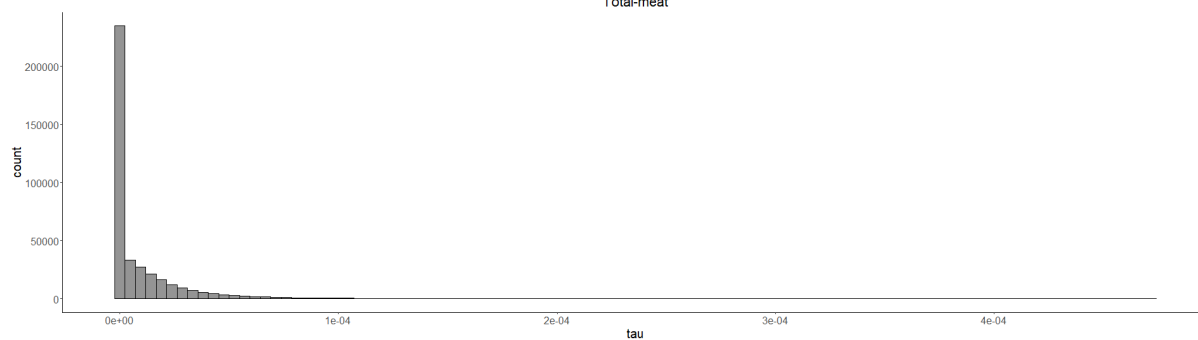

Fig 109

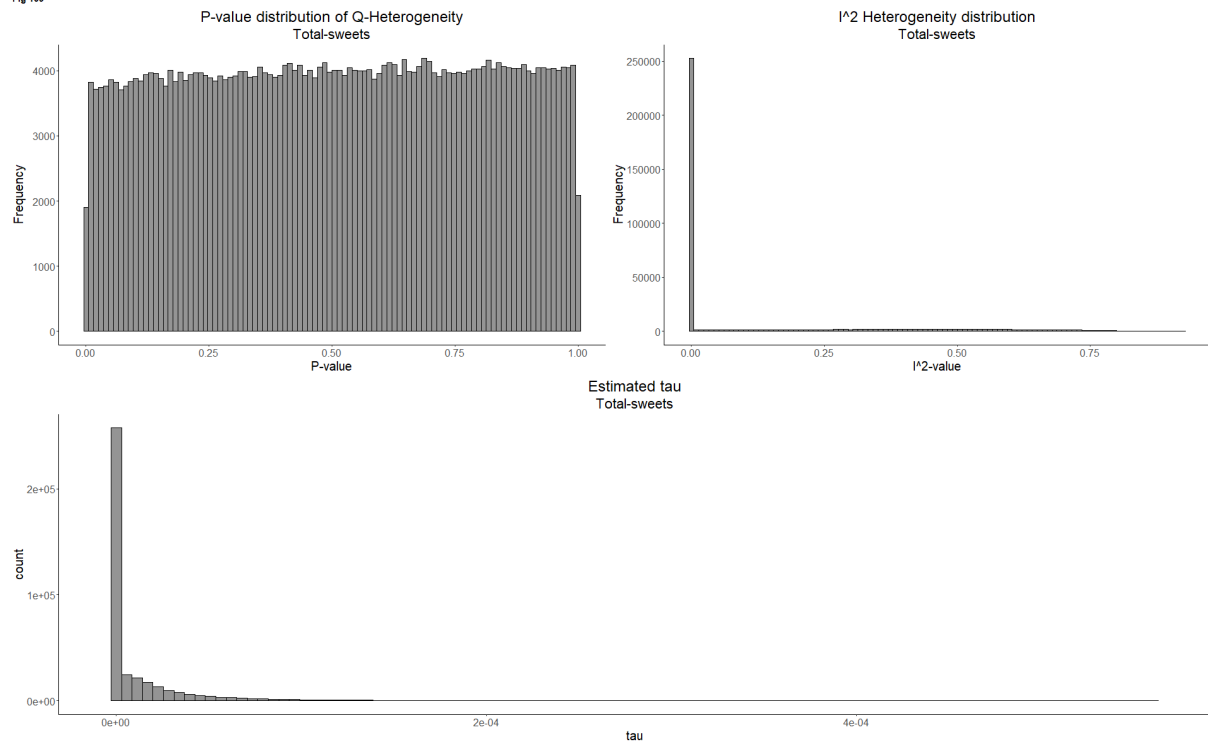

Fig 110

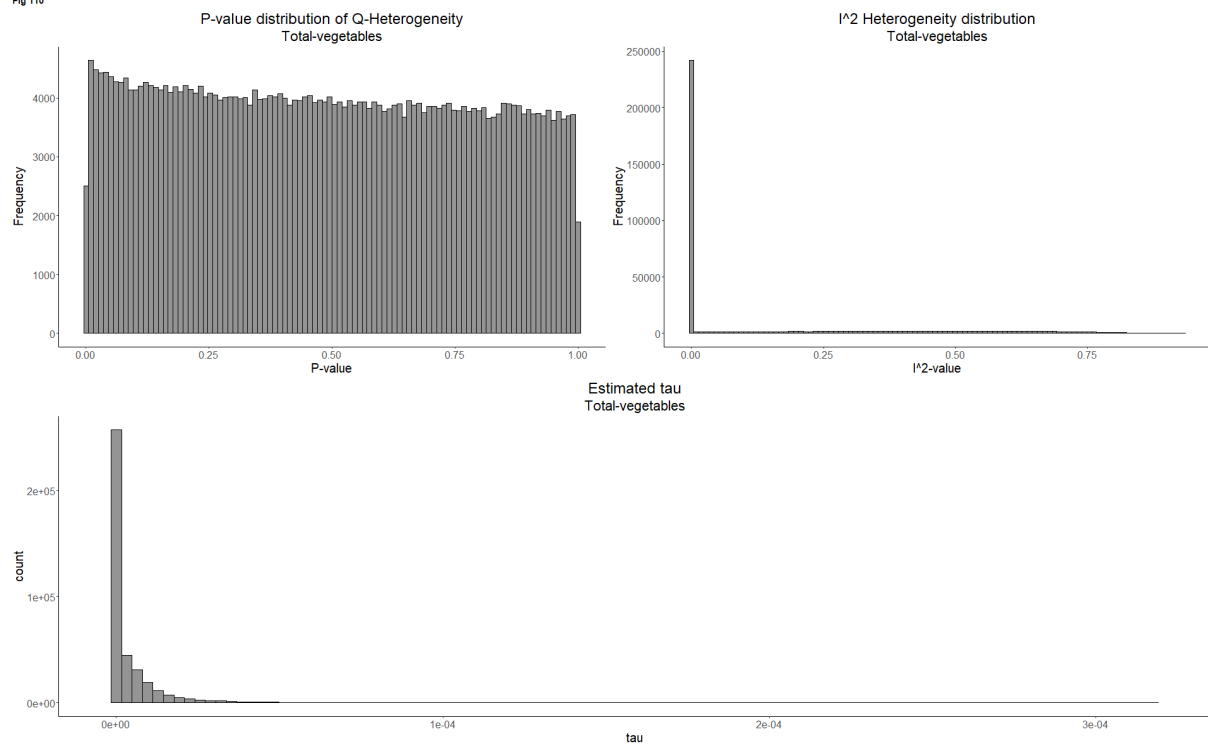

Fig 111

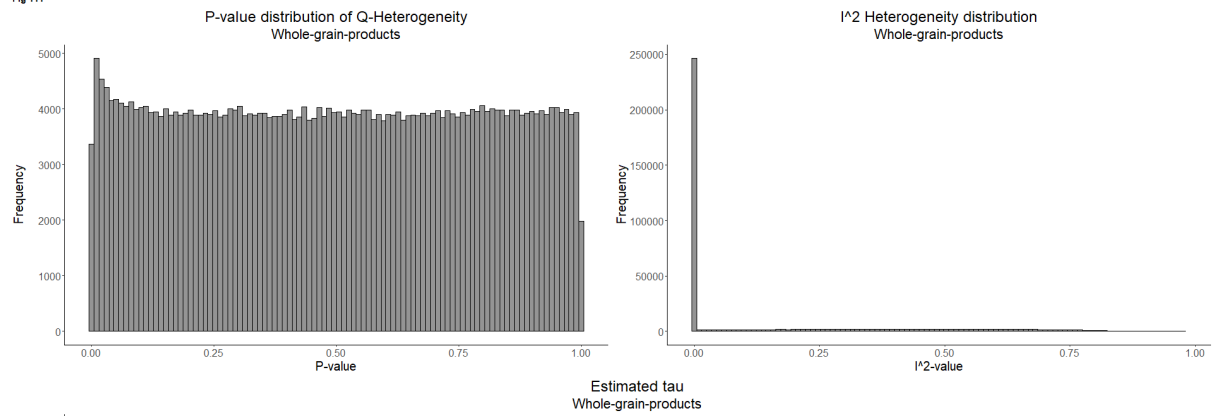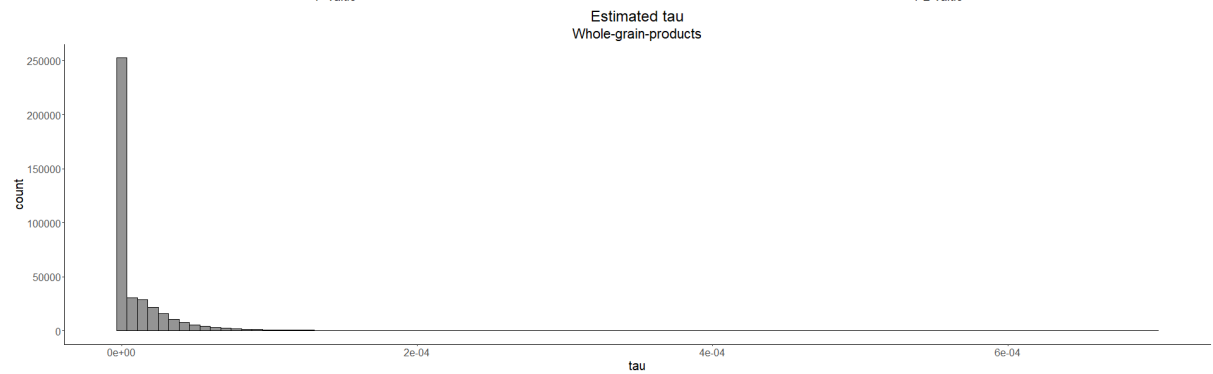

Fig 112

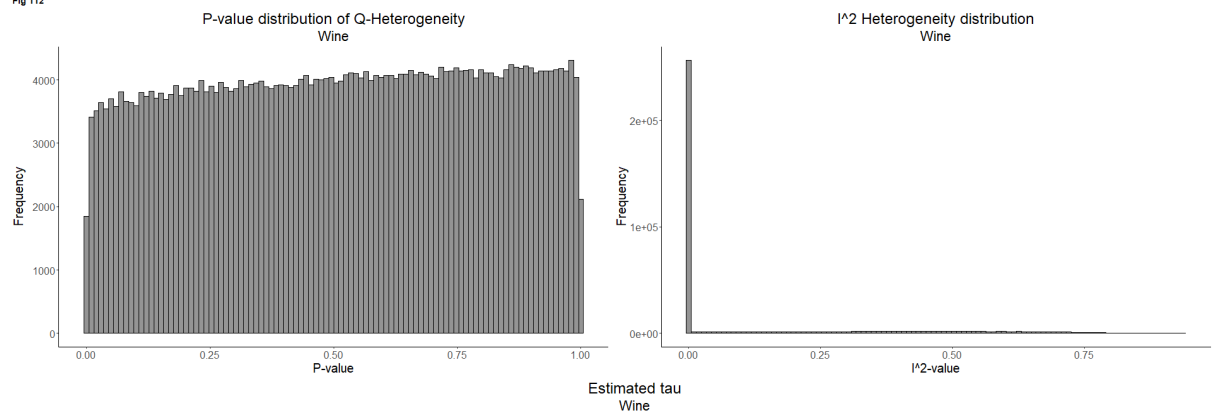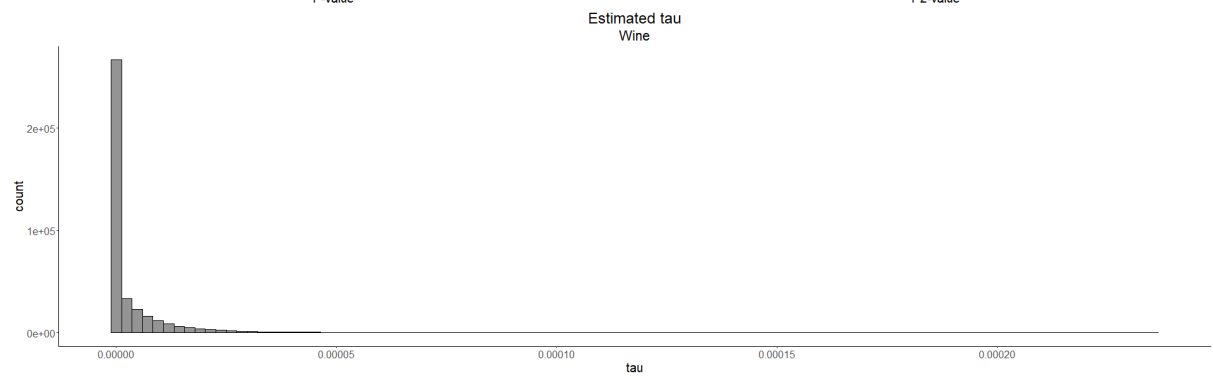

Fig 113

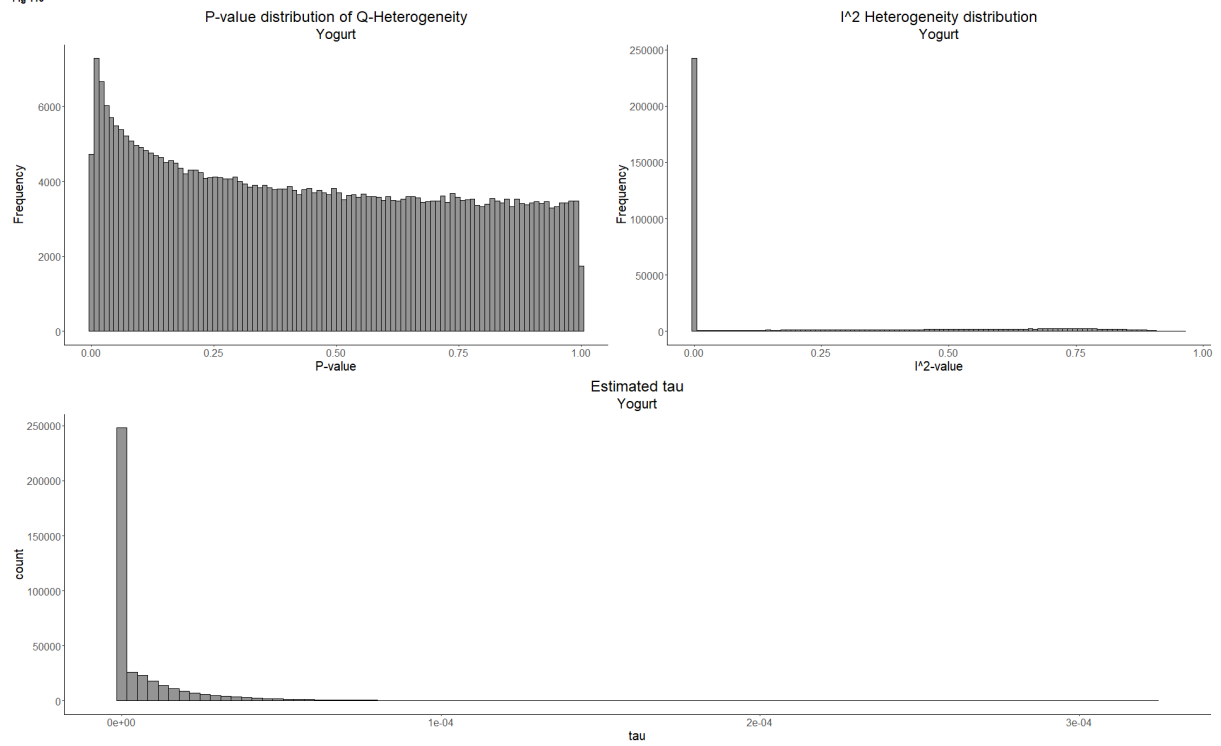

Supplement: MOESM4 [file 394_2022_3074_MOESM4_ESM.pdf › 394_2022_3074_MOESM4_ESM.pdf]
