# Supplementary material for: Pooled analysis of epigenome-wide association studies of food consumption in KORA, TwinsUK and LLS
Source: Springer Nature journal article supplement (doi:10.1007/s00394-022-03074-9), 2022-12-26
Supplement: MOESM5 [file 394_2022_3074_MOESM5_ESM.pdf › 394_2022_3074_MOESM5_ESM.pdf]

**Article title:** Pooled-analysis of epigenome-wide association studies of food consumption in KORA, TwinsUK and LLS

**Journal name:** European Journal of Nutrition

**Author names:** Fabian Hellbach, Lucy Sinke, Ricardo Costeira, Sebastian-Edgar Baumeister, Marian Beekman, Panayiotis Louca, Emily R Leeming, Olatz Mompeo, Sarah Berry, Rory Wilson, Nina Wawro, Dennis Freuer, Hans Hauner, Annette Peters, Juliane Winkelmann, Wolfgang Koenig, Christa Meisinger, Melanie Waldenberger, Bas Heijmans, Eline Slagboom, Jordana T Bell, Jakob Linseisen

**Corresponding Author:** Fabian Hellbach<sup>1,2</sup>

**Email:** [fabian.hellbach@med.uni-augsburg.de](mailto:fabian.hellbach@med.uni-augsburg.de)

<sup>1</sup>Institute for Medical Information Processing, Biometry, and Epidemiology; Medical Faculty; Ludwig-Maximilian University Munich; Marchioninstr. 15, 81377 Munich, Germany

<sup>2</sup>Epidemiology; Faculty of Medicine; University of Augsburg; University Hospital Augsburg; Stenglinstraße 2, 86156 Augsburg; Germany

**Caption:** Volcano plots for every food group analyzed. Effect size on the x-axis is %-methylation change per gram residual/day. Turquoise dots were significant after false-discovery rate correction.

Fig 114

Volcano plot  
AHEI

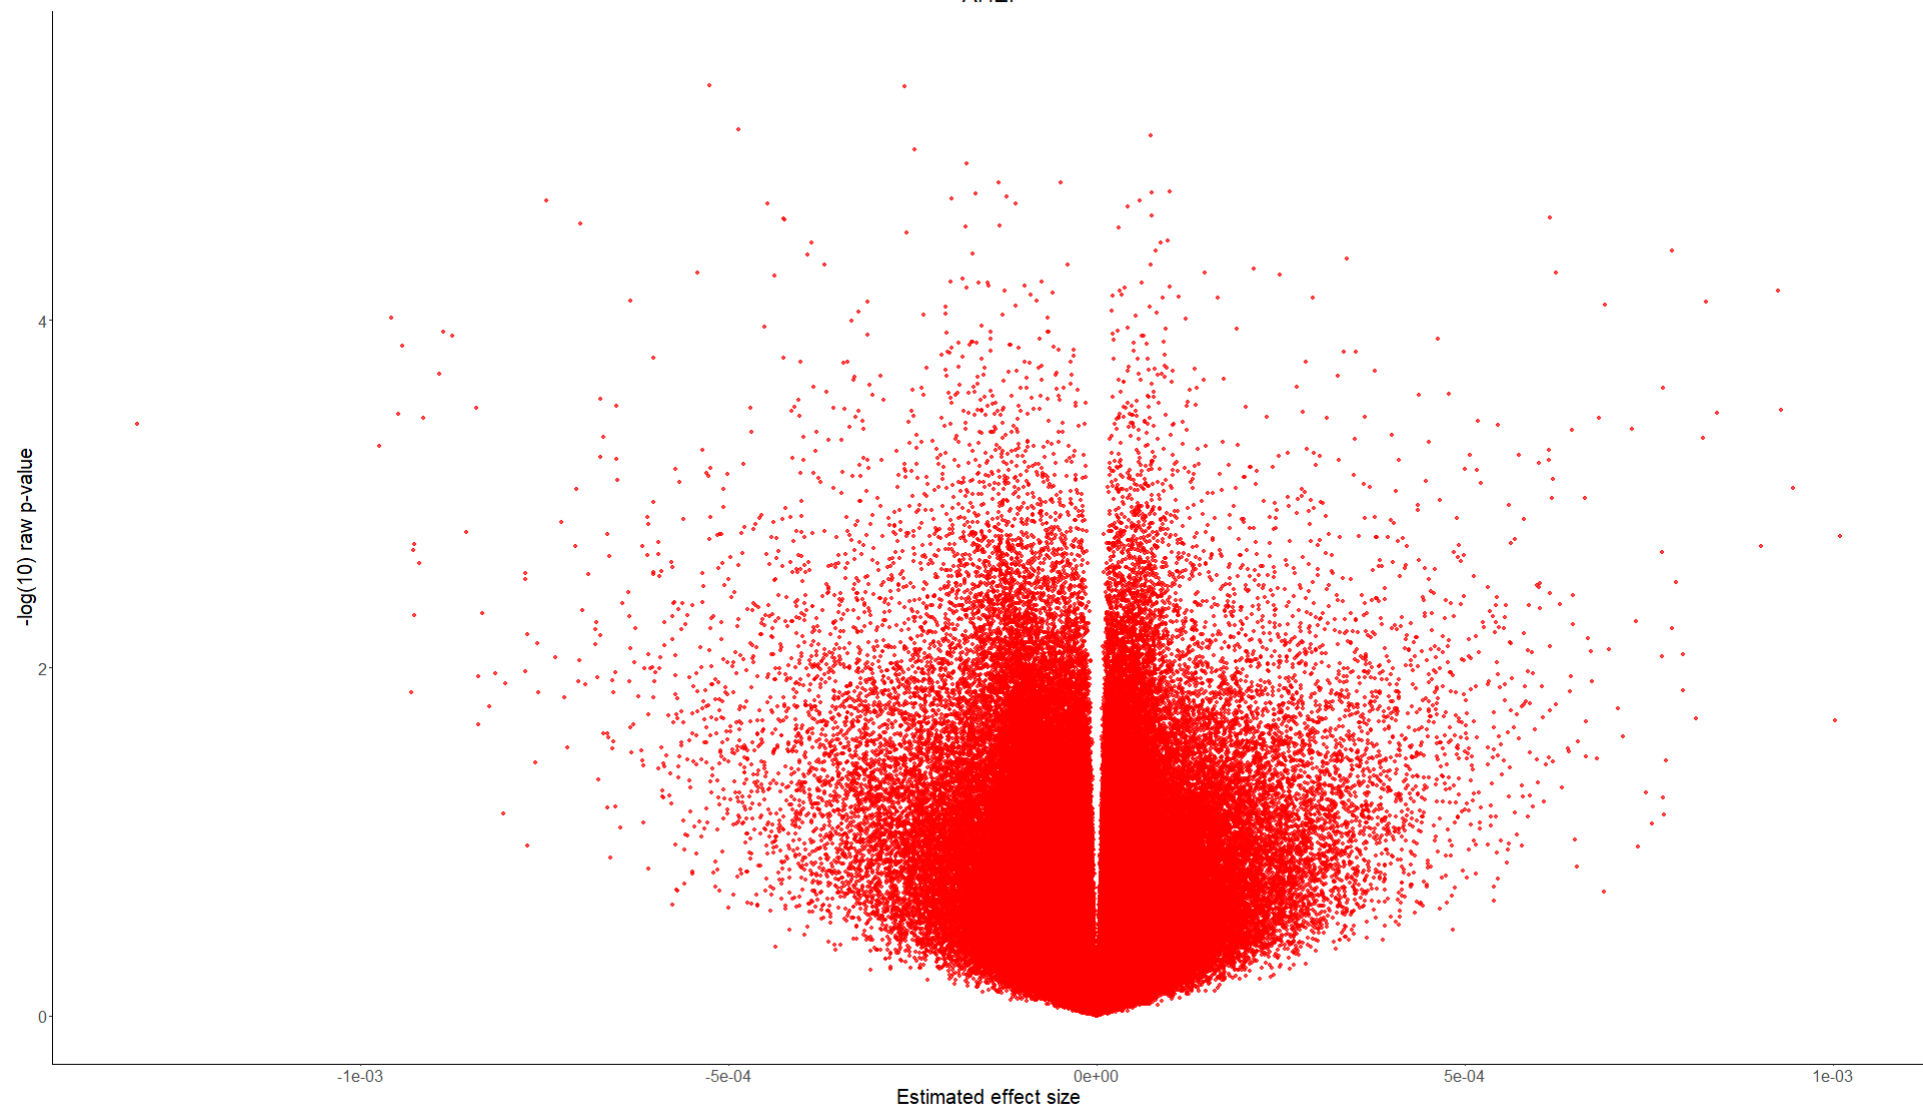

0 exceeded alpha threshold  
fdr corrected

Fig 115

Volcano plot  
Alcohol

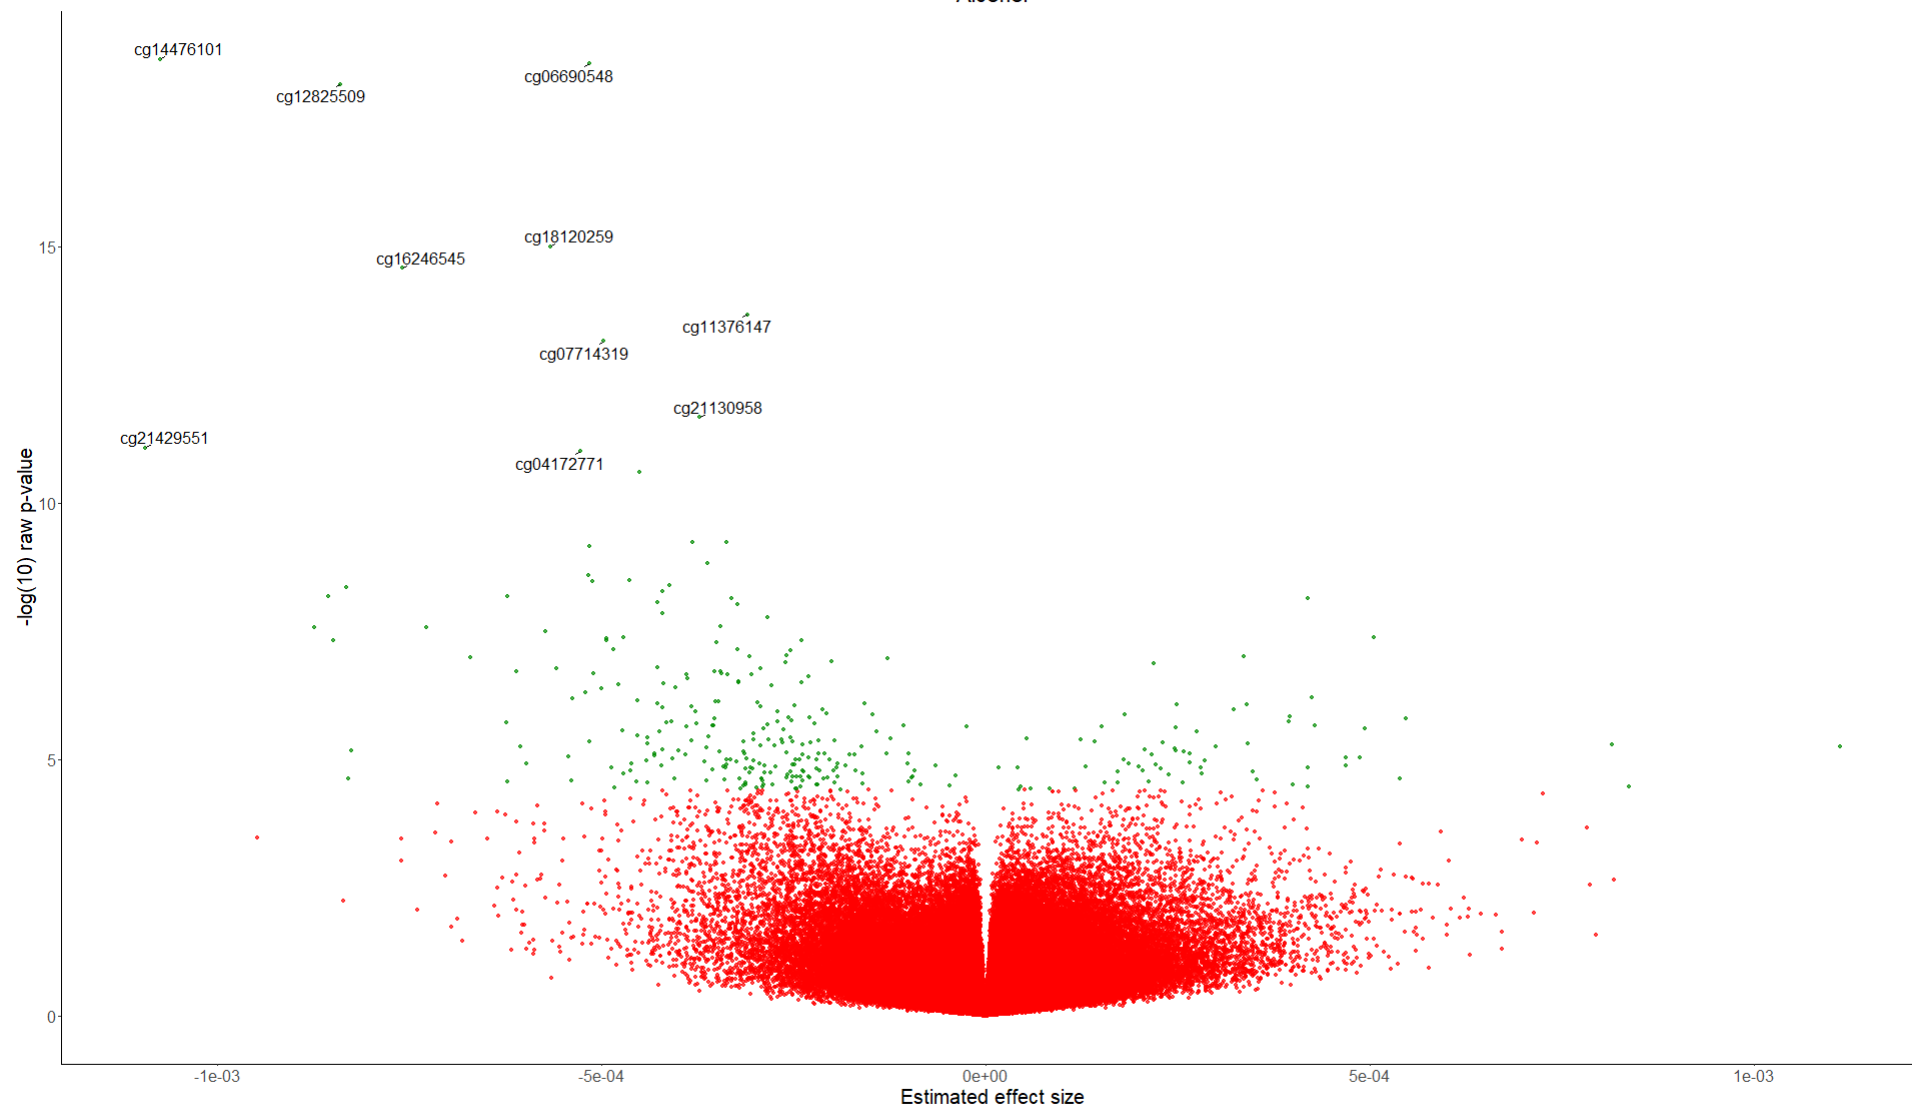

308 exceeded alpha threshold  
fdr corrected

Fig 116

Volcano plot  
Beer

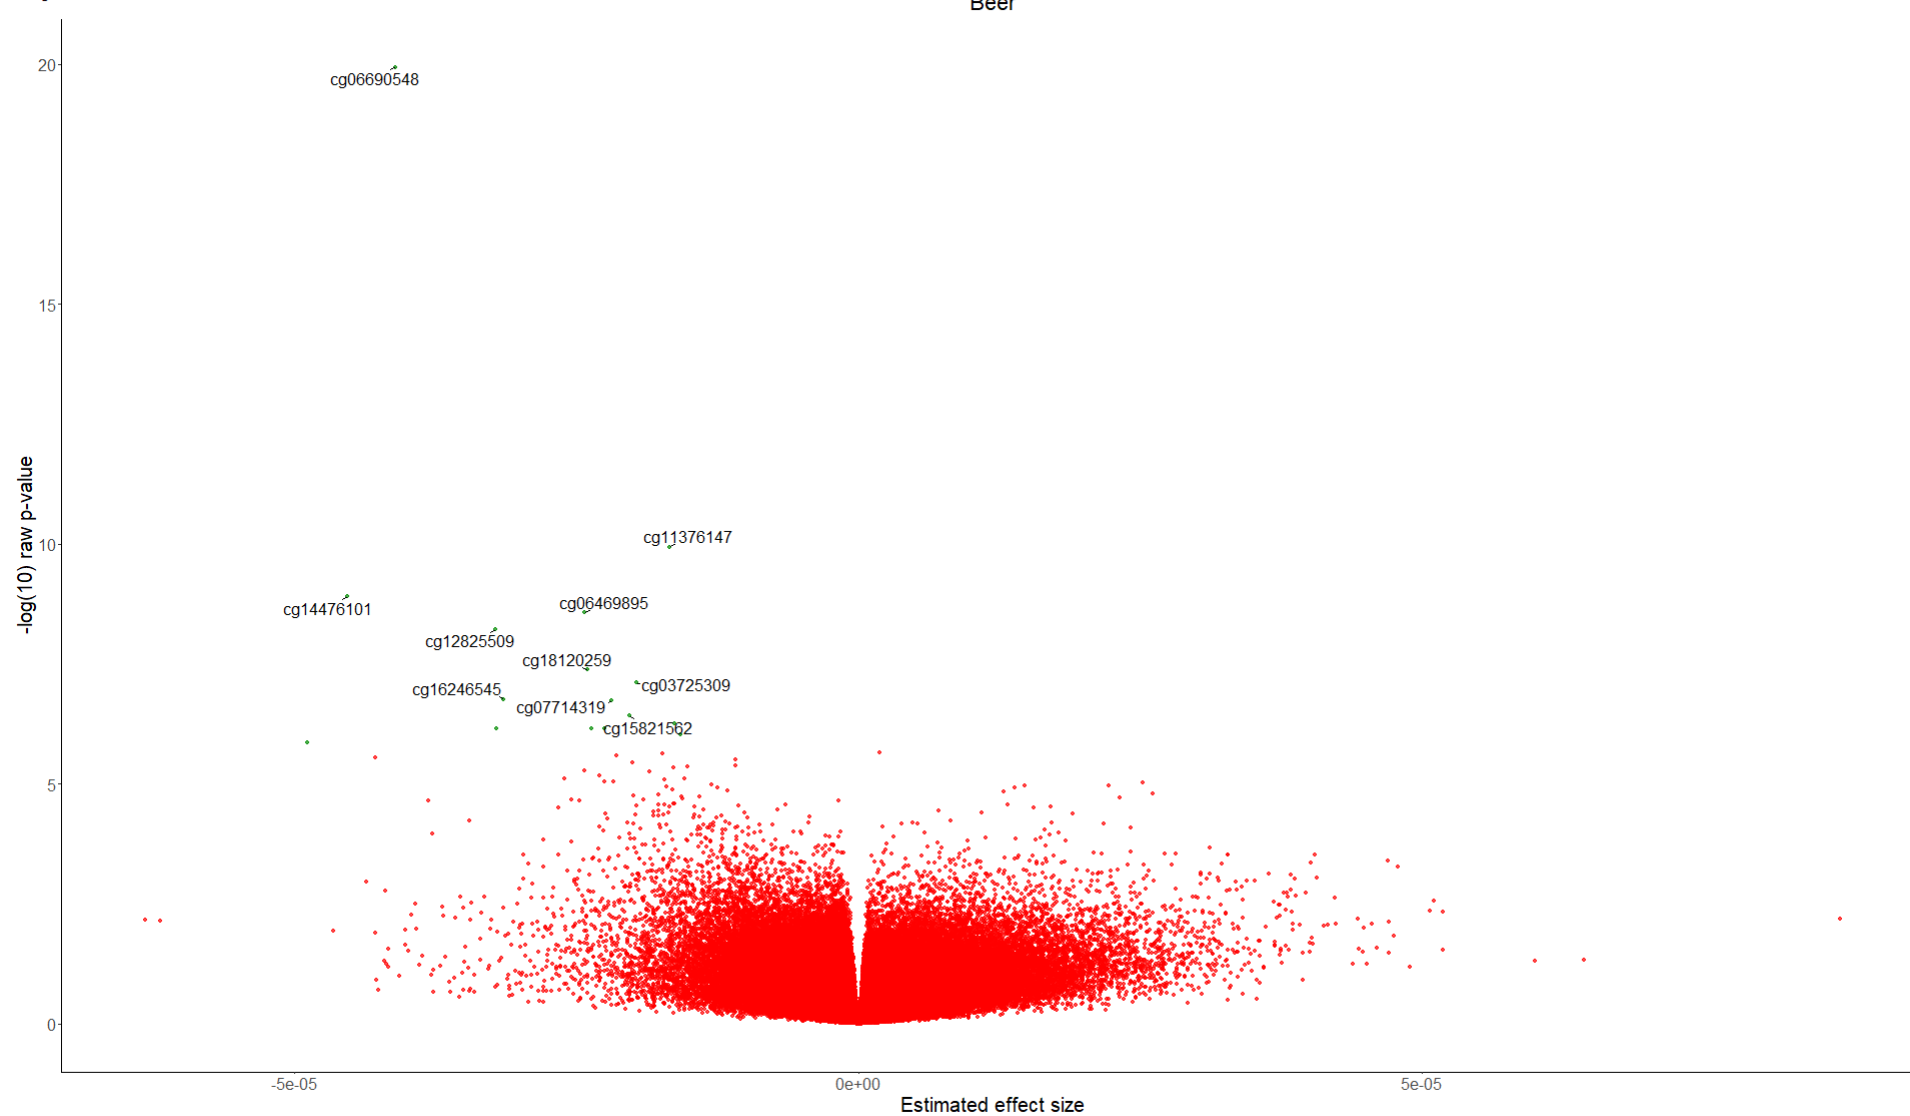

16 exceeded alpha threshold  
fdr corrected

Fig 117

# Volcano plot Butter

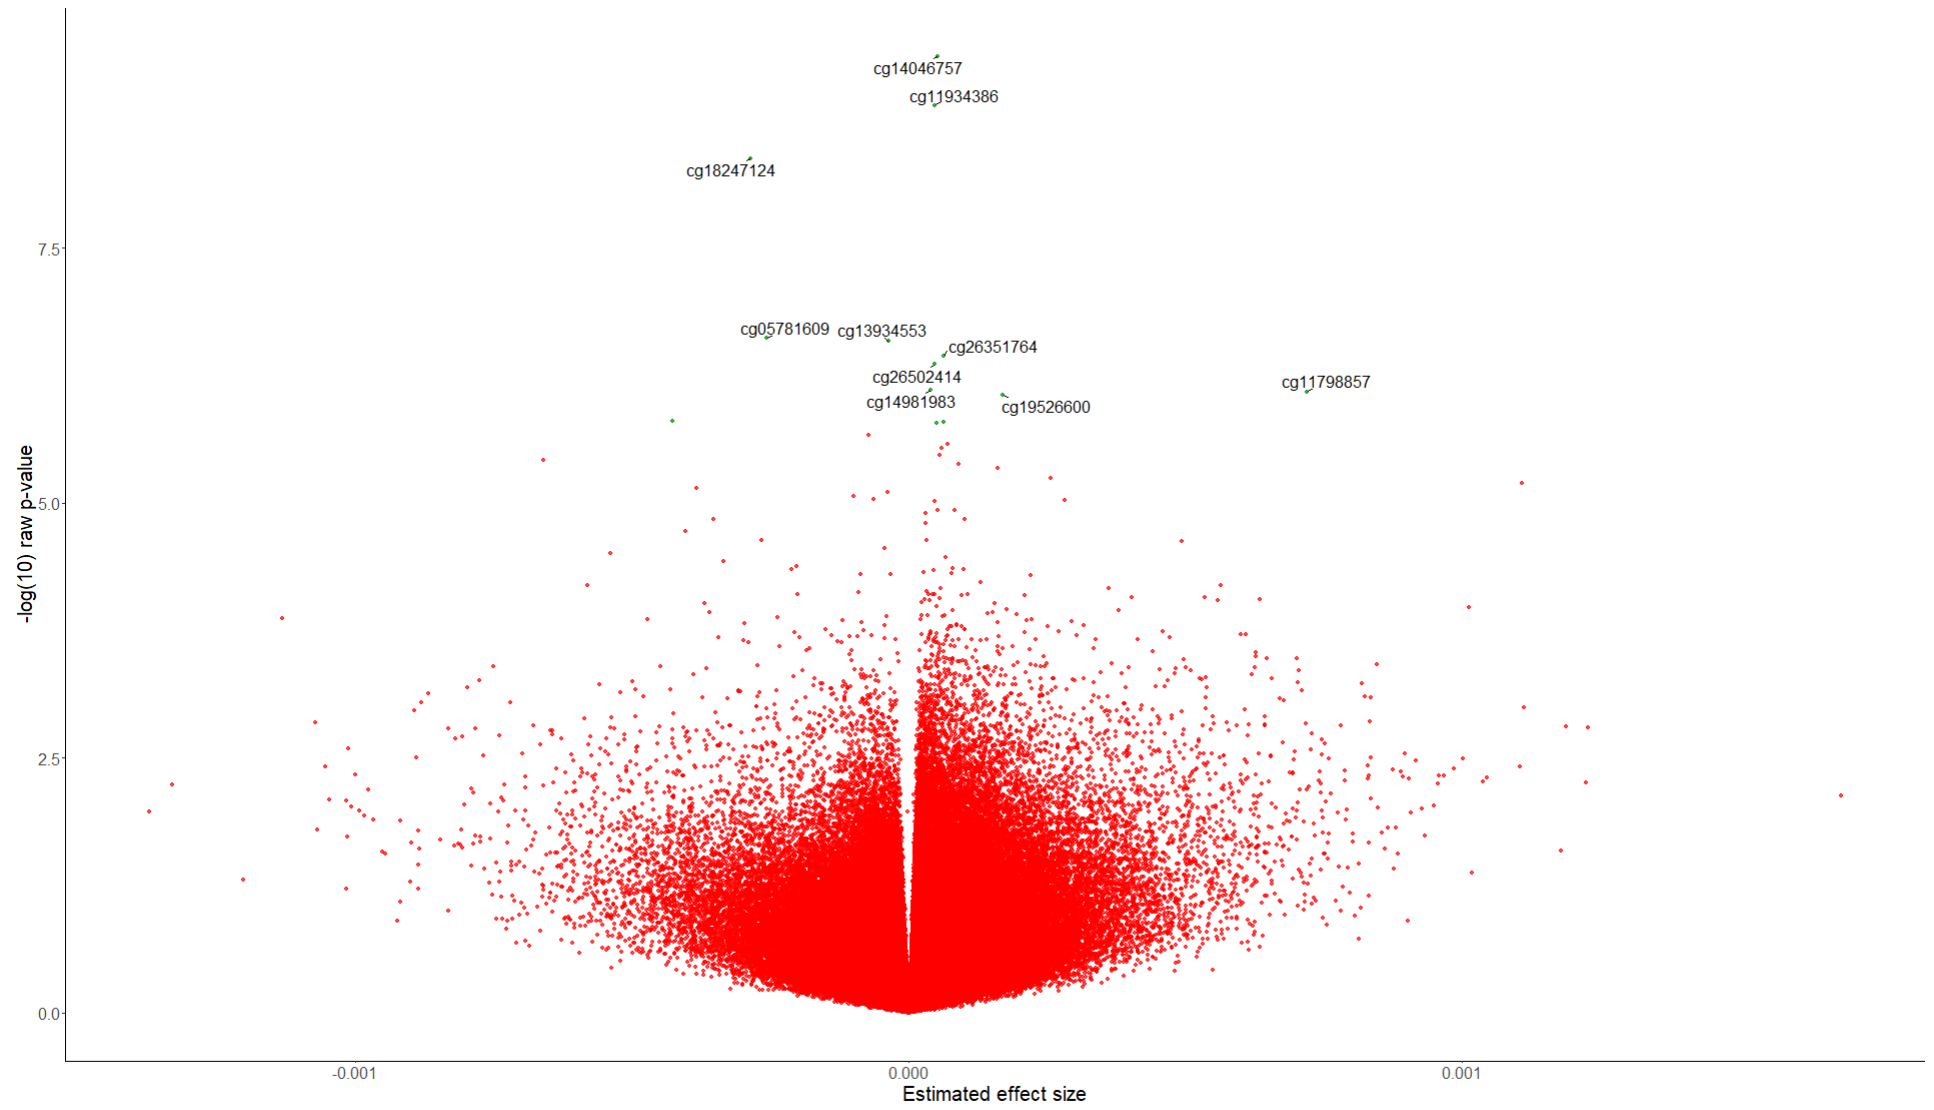

13 exceeded alpha threshold  
fdr corrected

Fig 118

Volcano plot  
Cabbage-vegetables

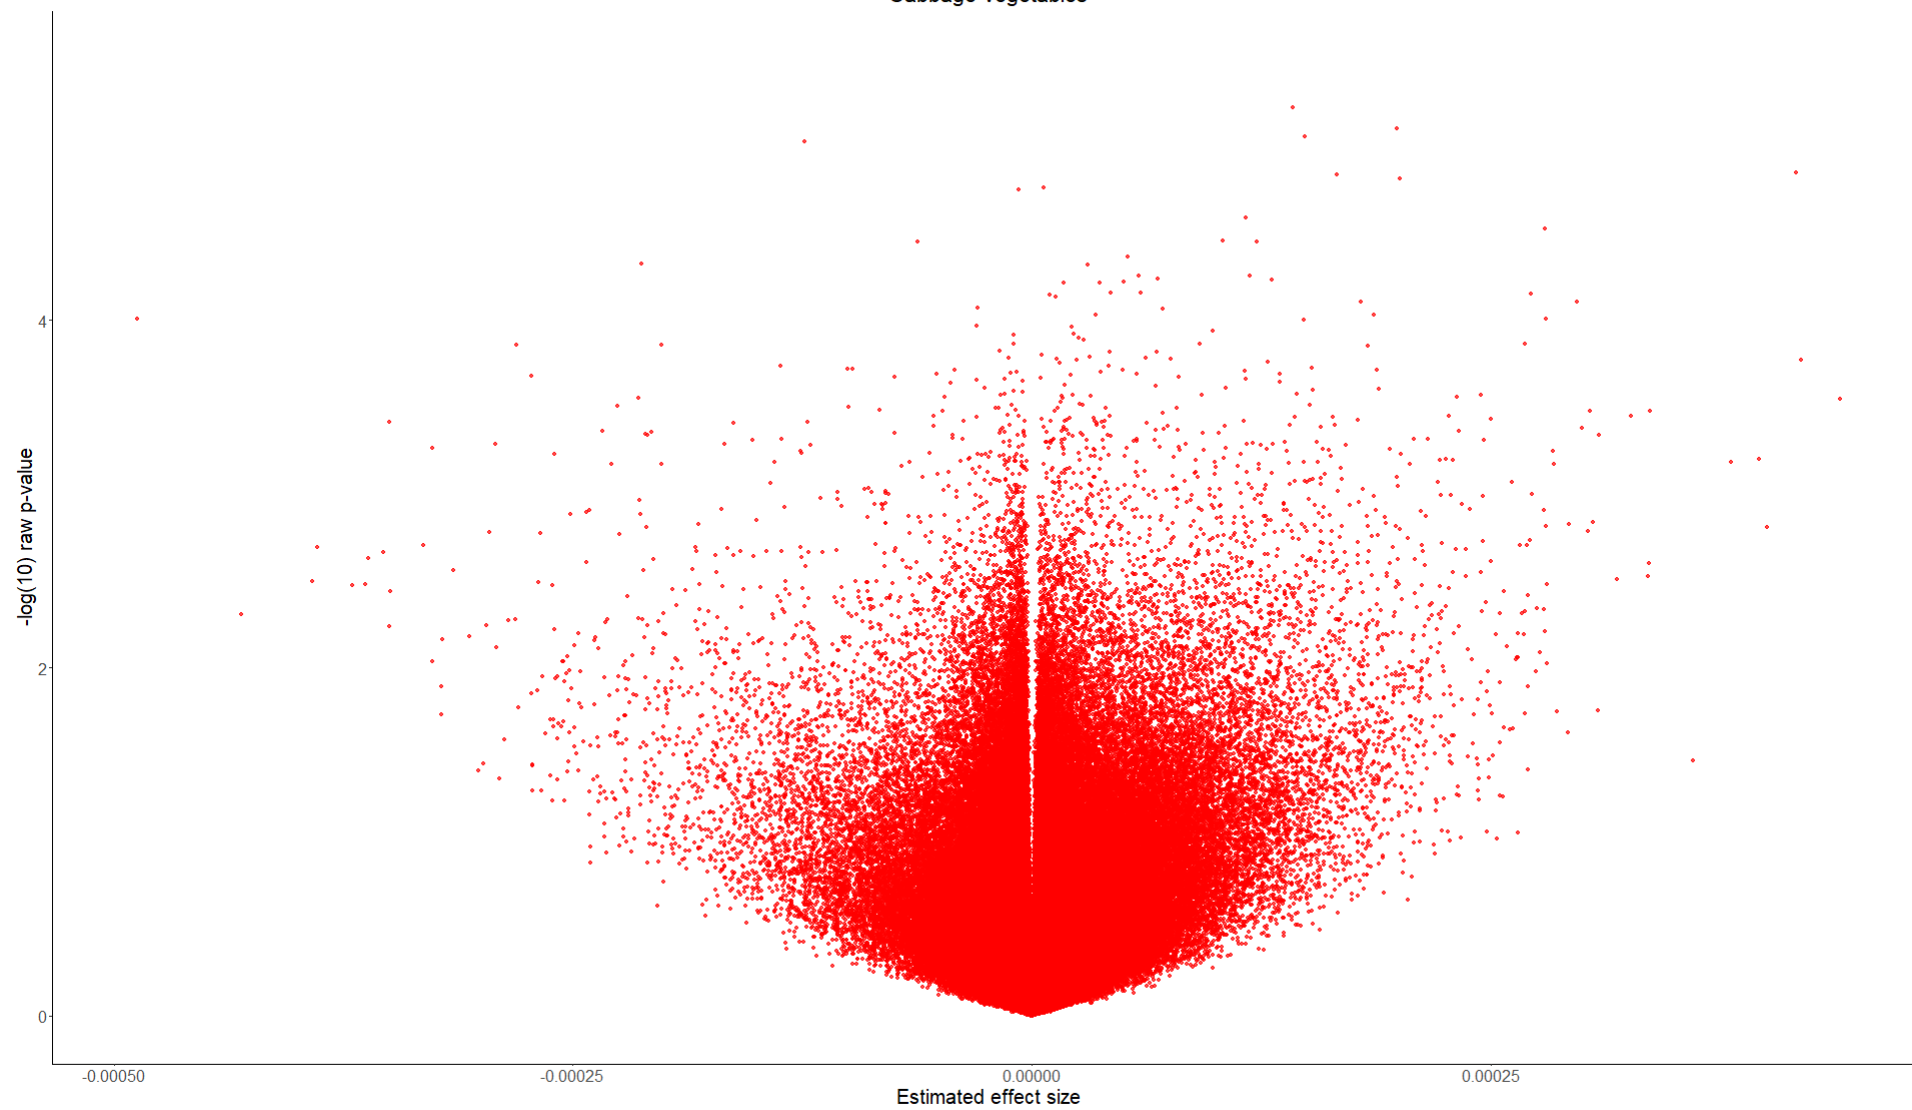

0 exceeded alpha threshold  
fdr corrected

Fig 119

# Volcano plot Cakes

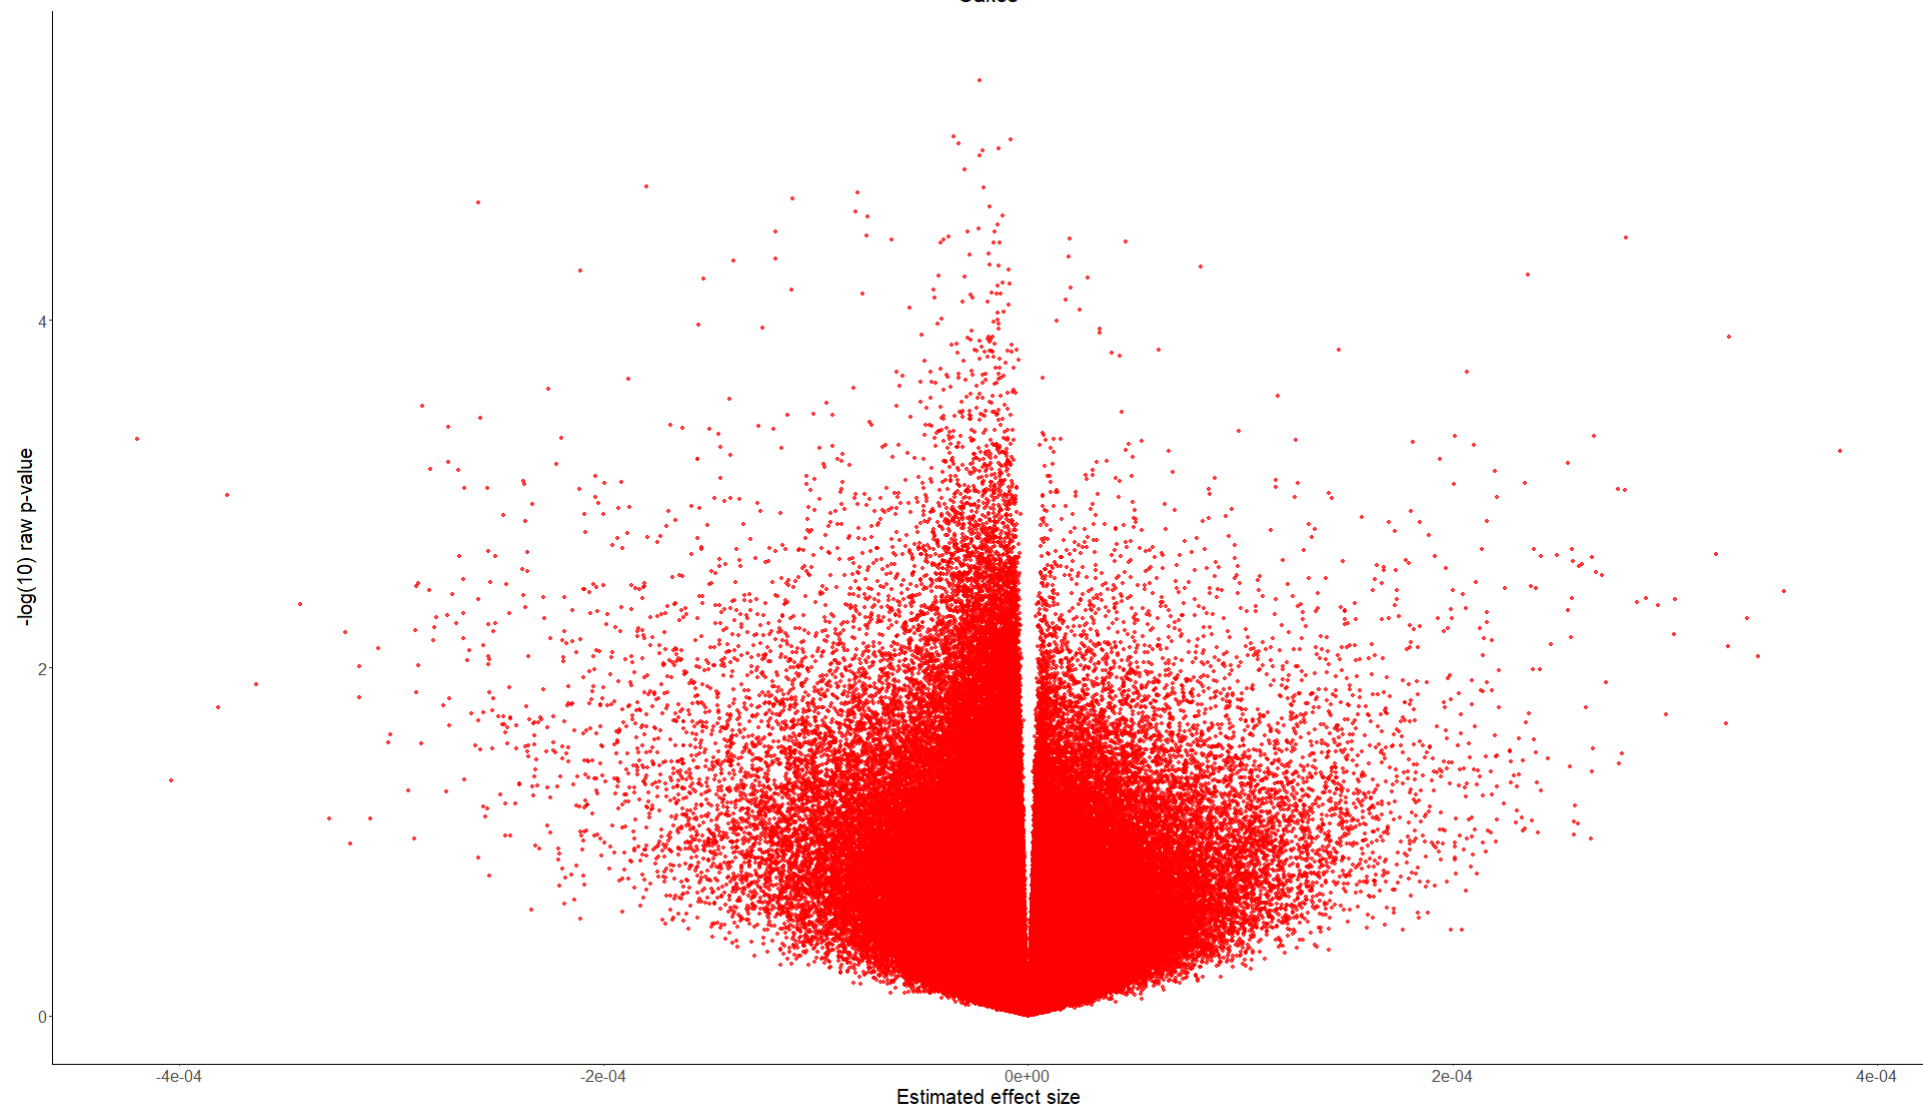

0 exceeded alpha threshold  
fdr corrected

Fig 120

# Volcano plot Cheese

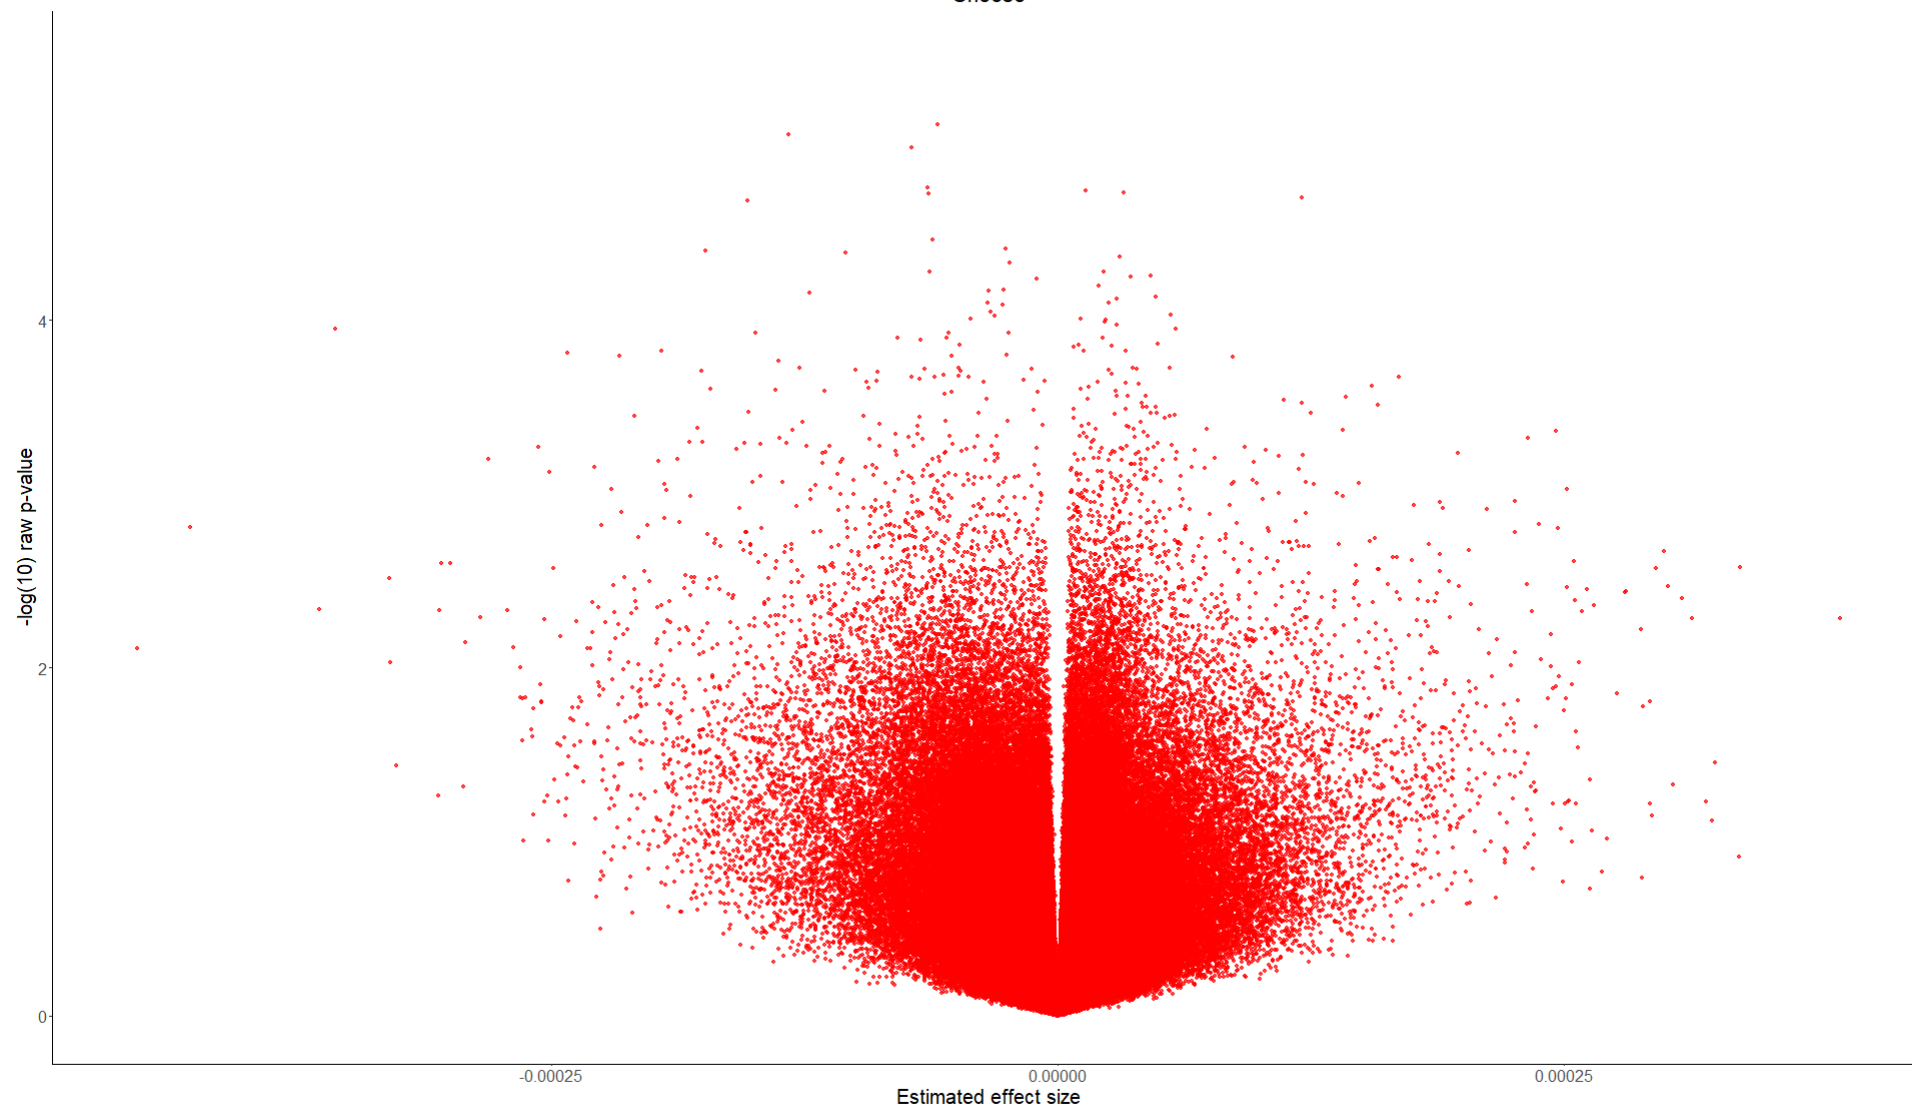

0 exceeded alpha threshold  
fdr corrected



Fig 121

Volcano plot  
Coffee

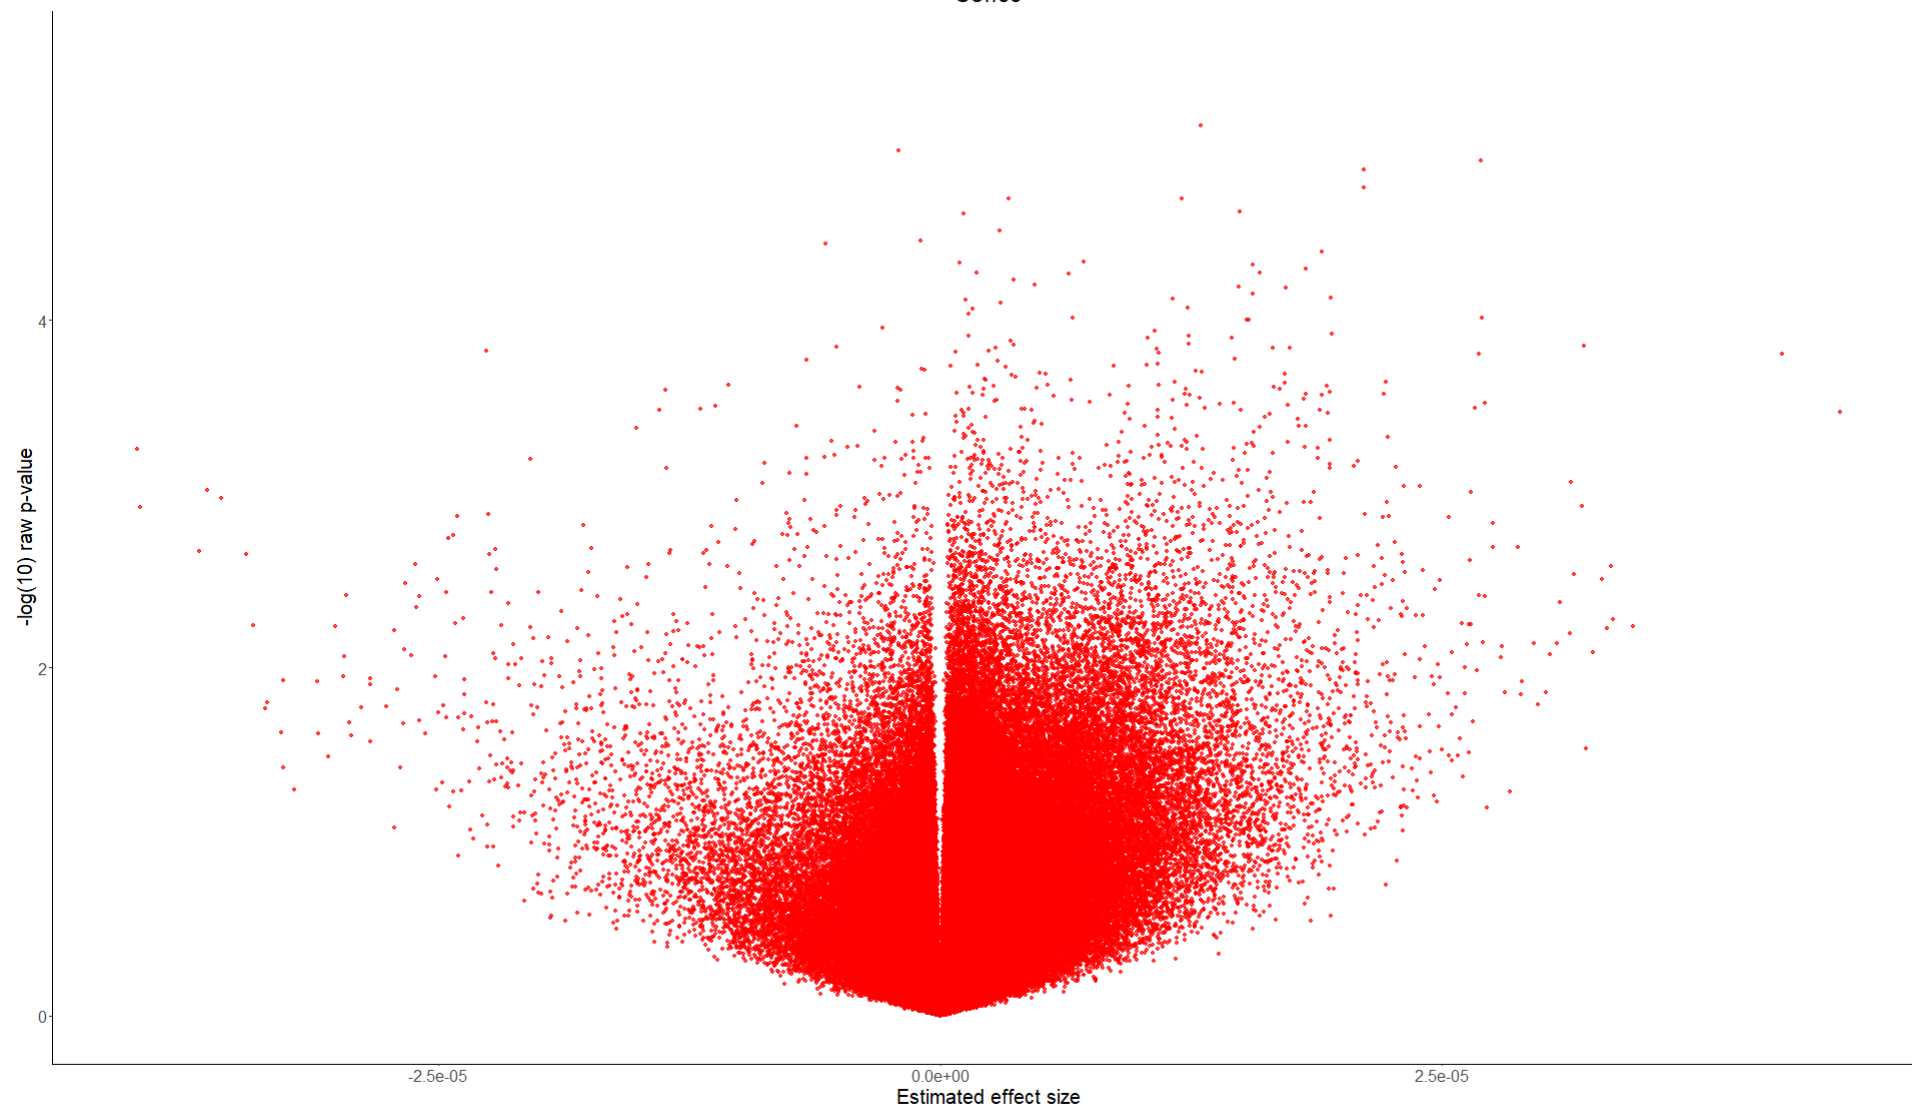

0 exceeded alpha threshold  
fdr corrected

Fig 122

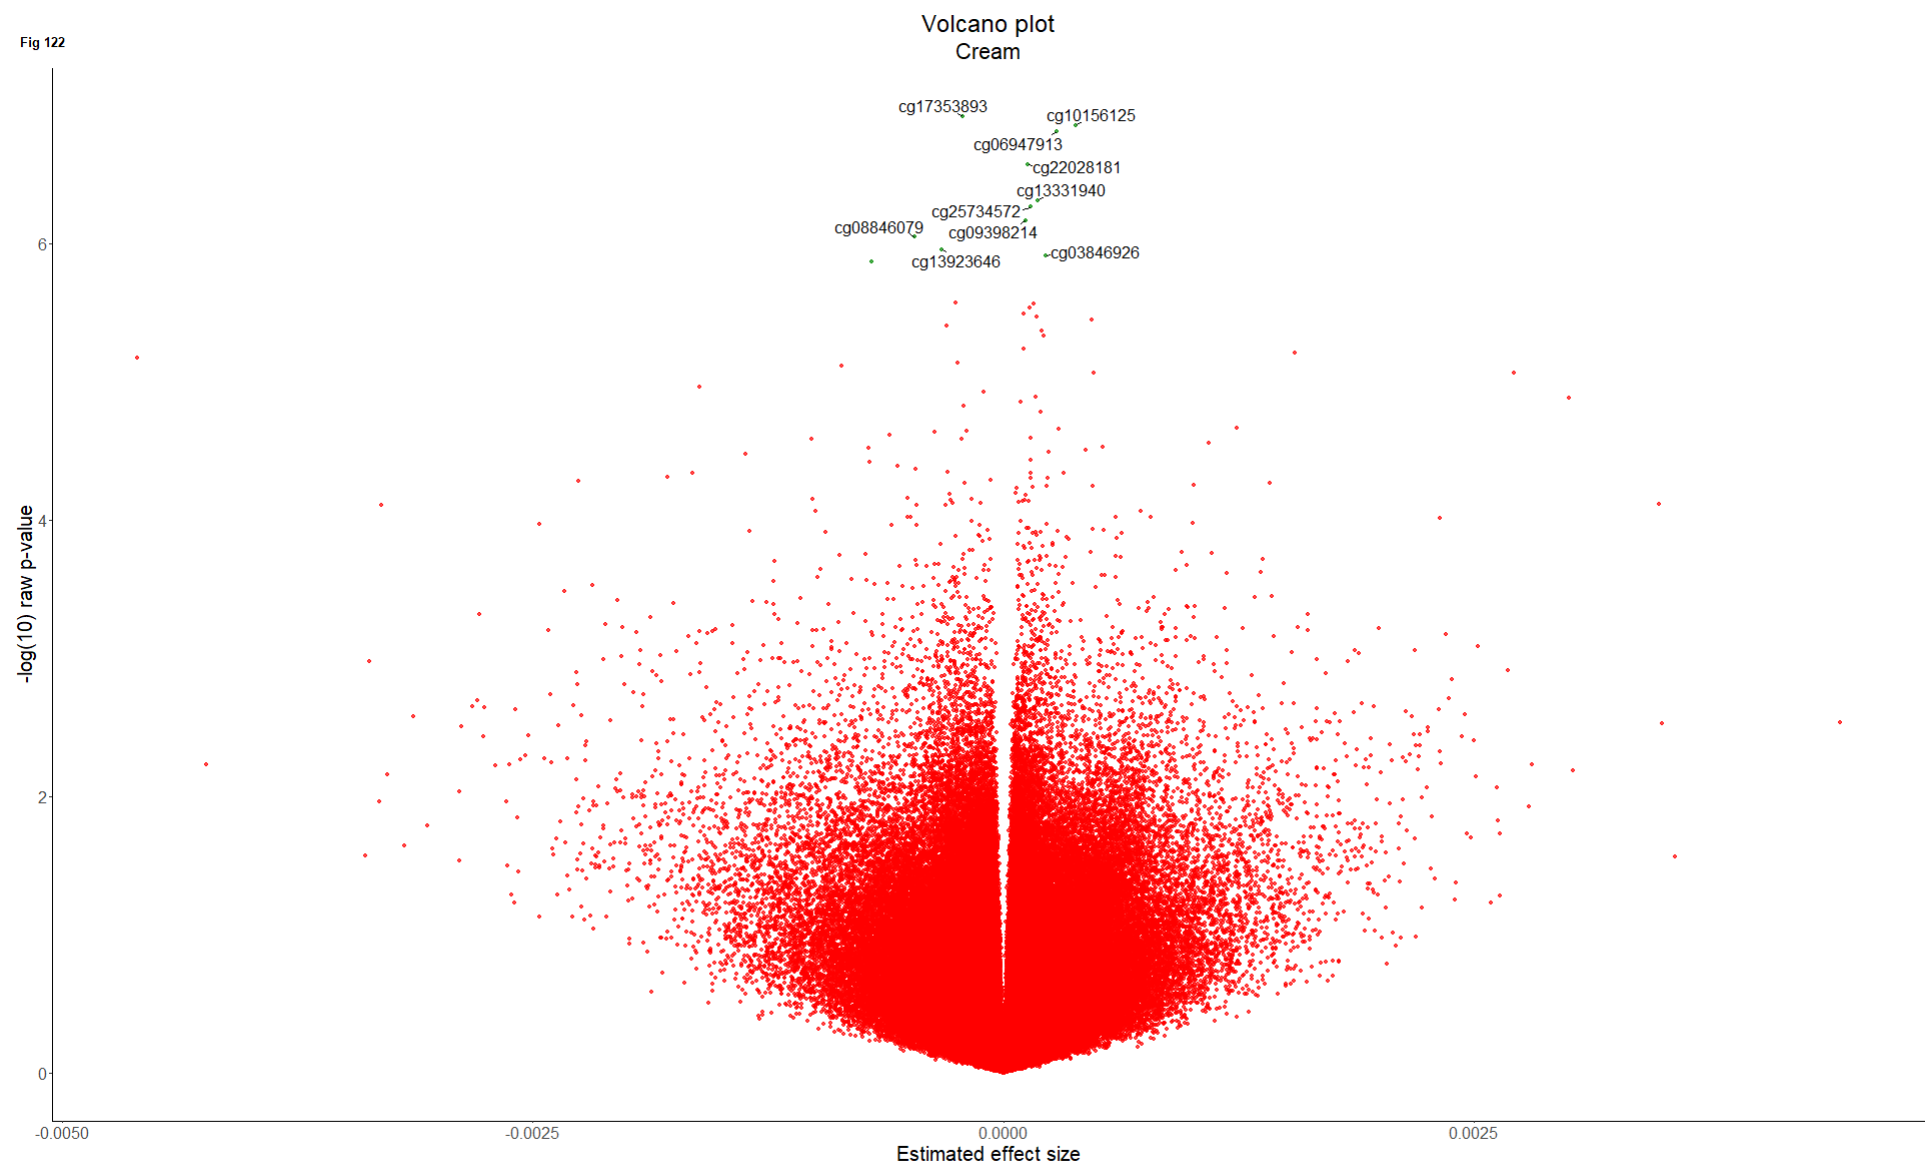

Fig 123

# Volcano plot Eggs

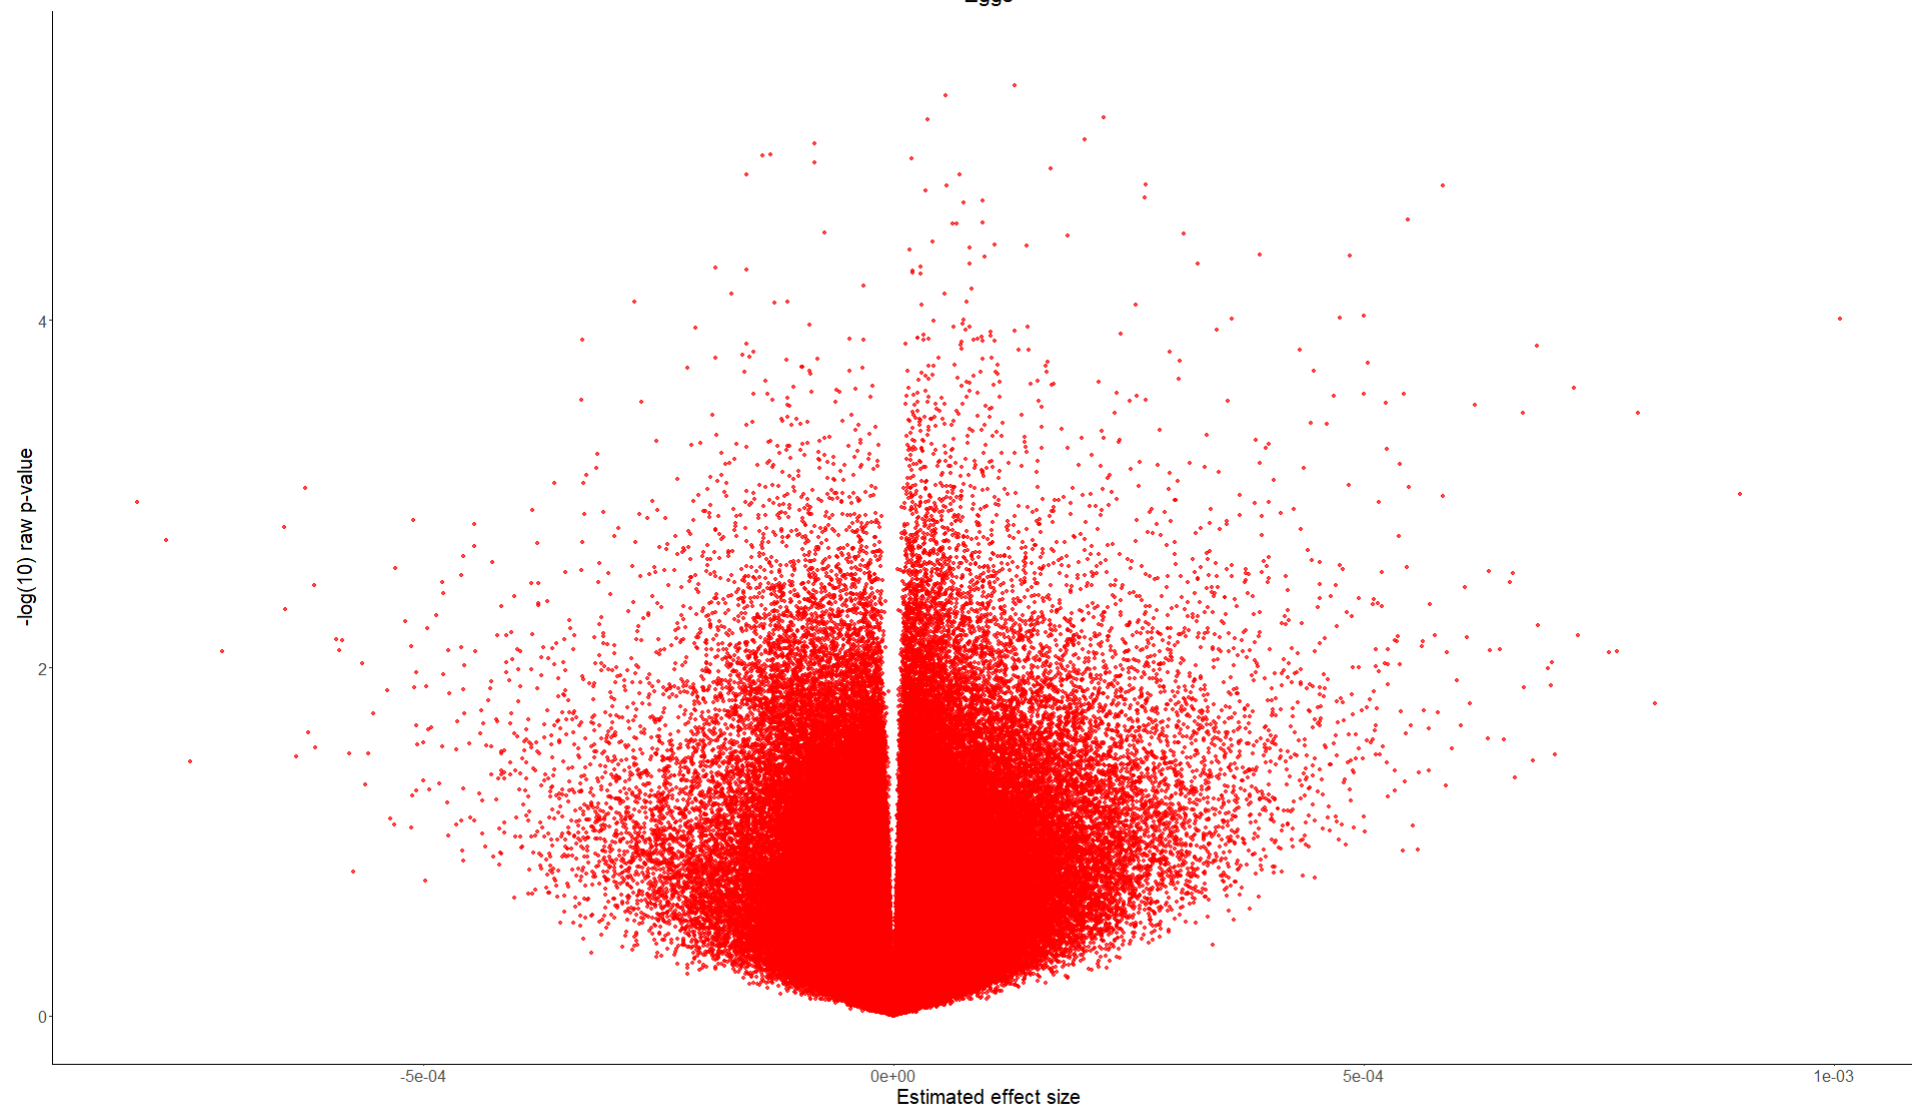

0 exceeded alpha threshold  
fdr corrected

Fig 124

Volcano plot  
Folic-acid

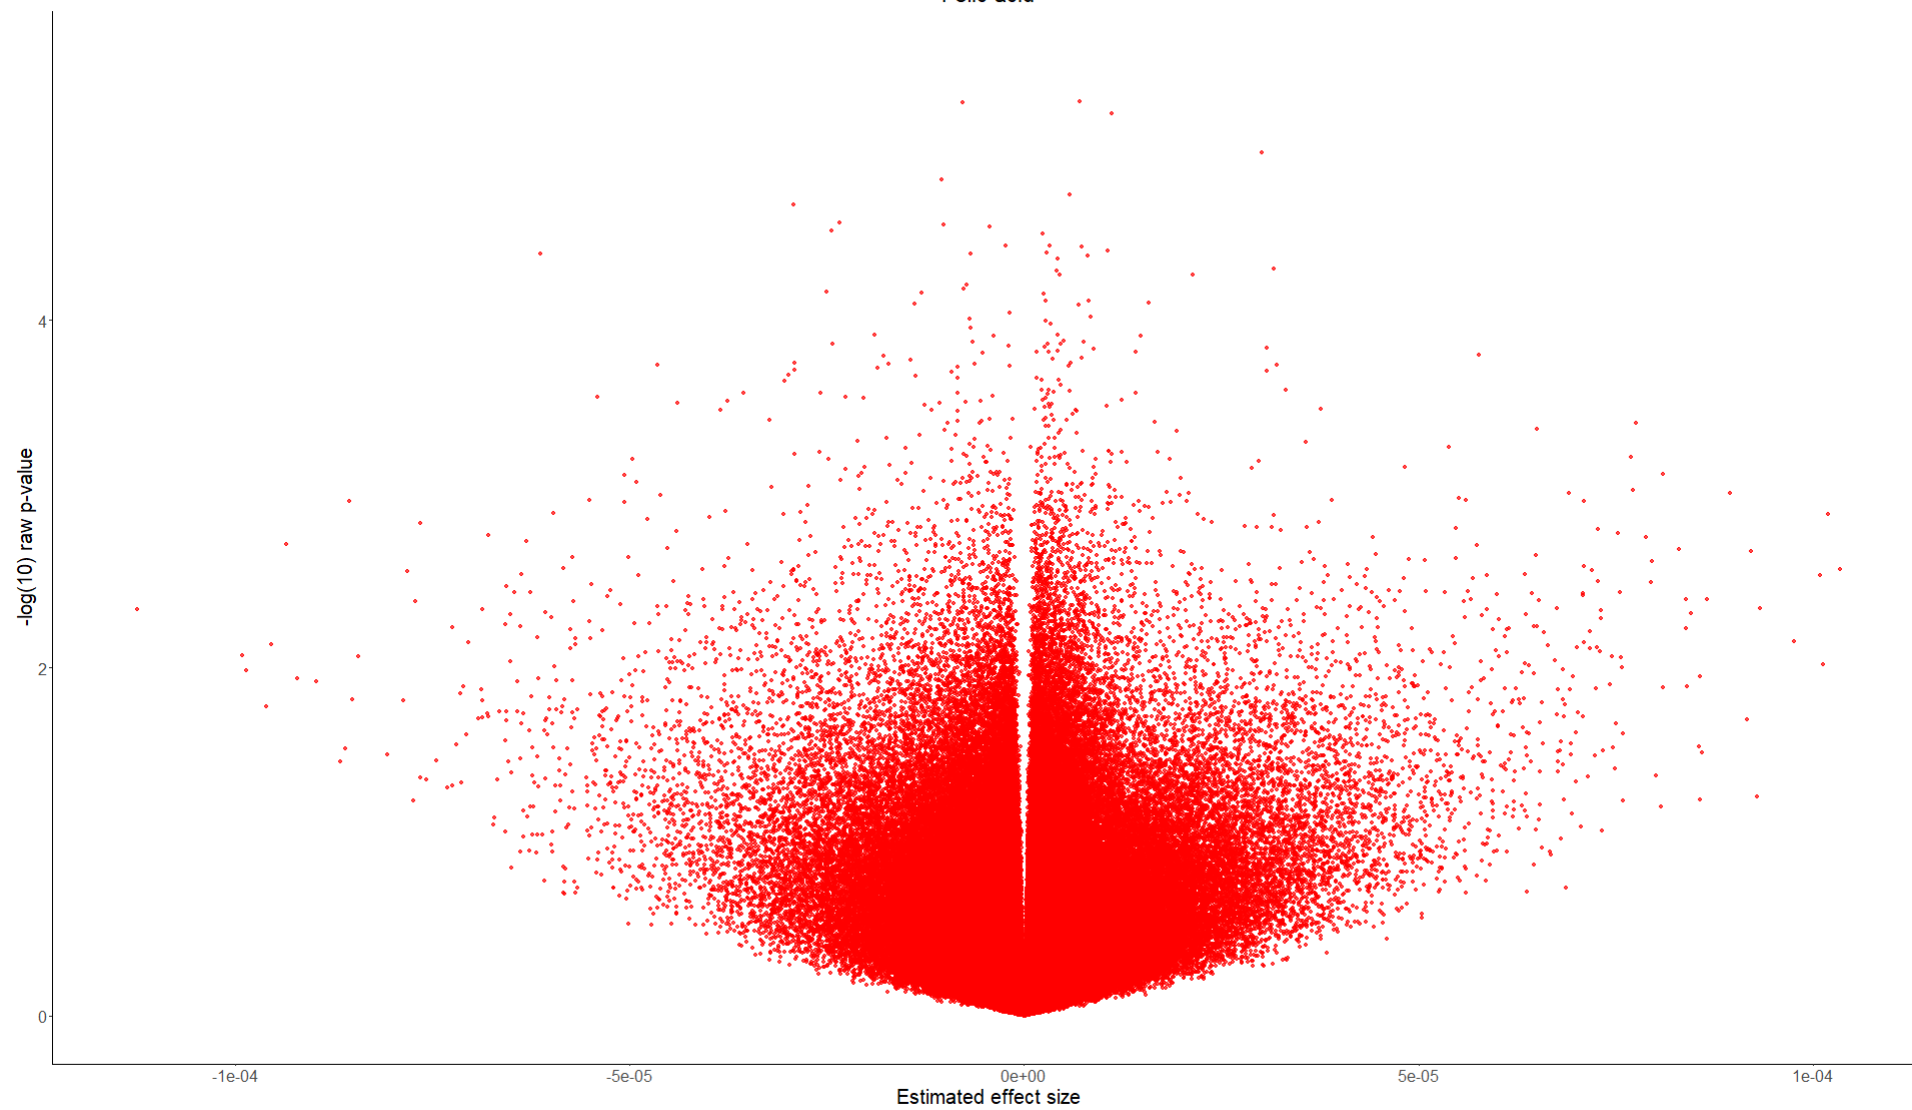

0 exceeded alpha threshold  
fdr corrected

Fig 125

Volcano plot  
Fresh-red-meat

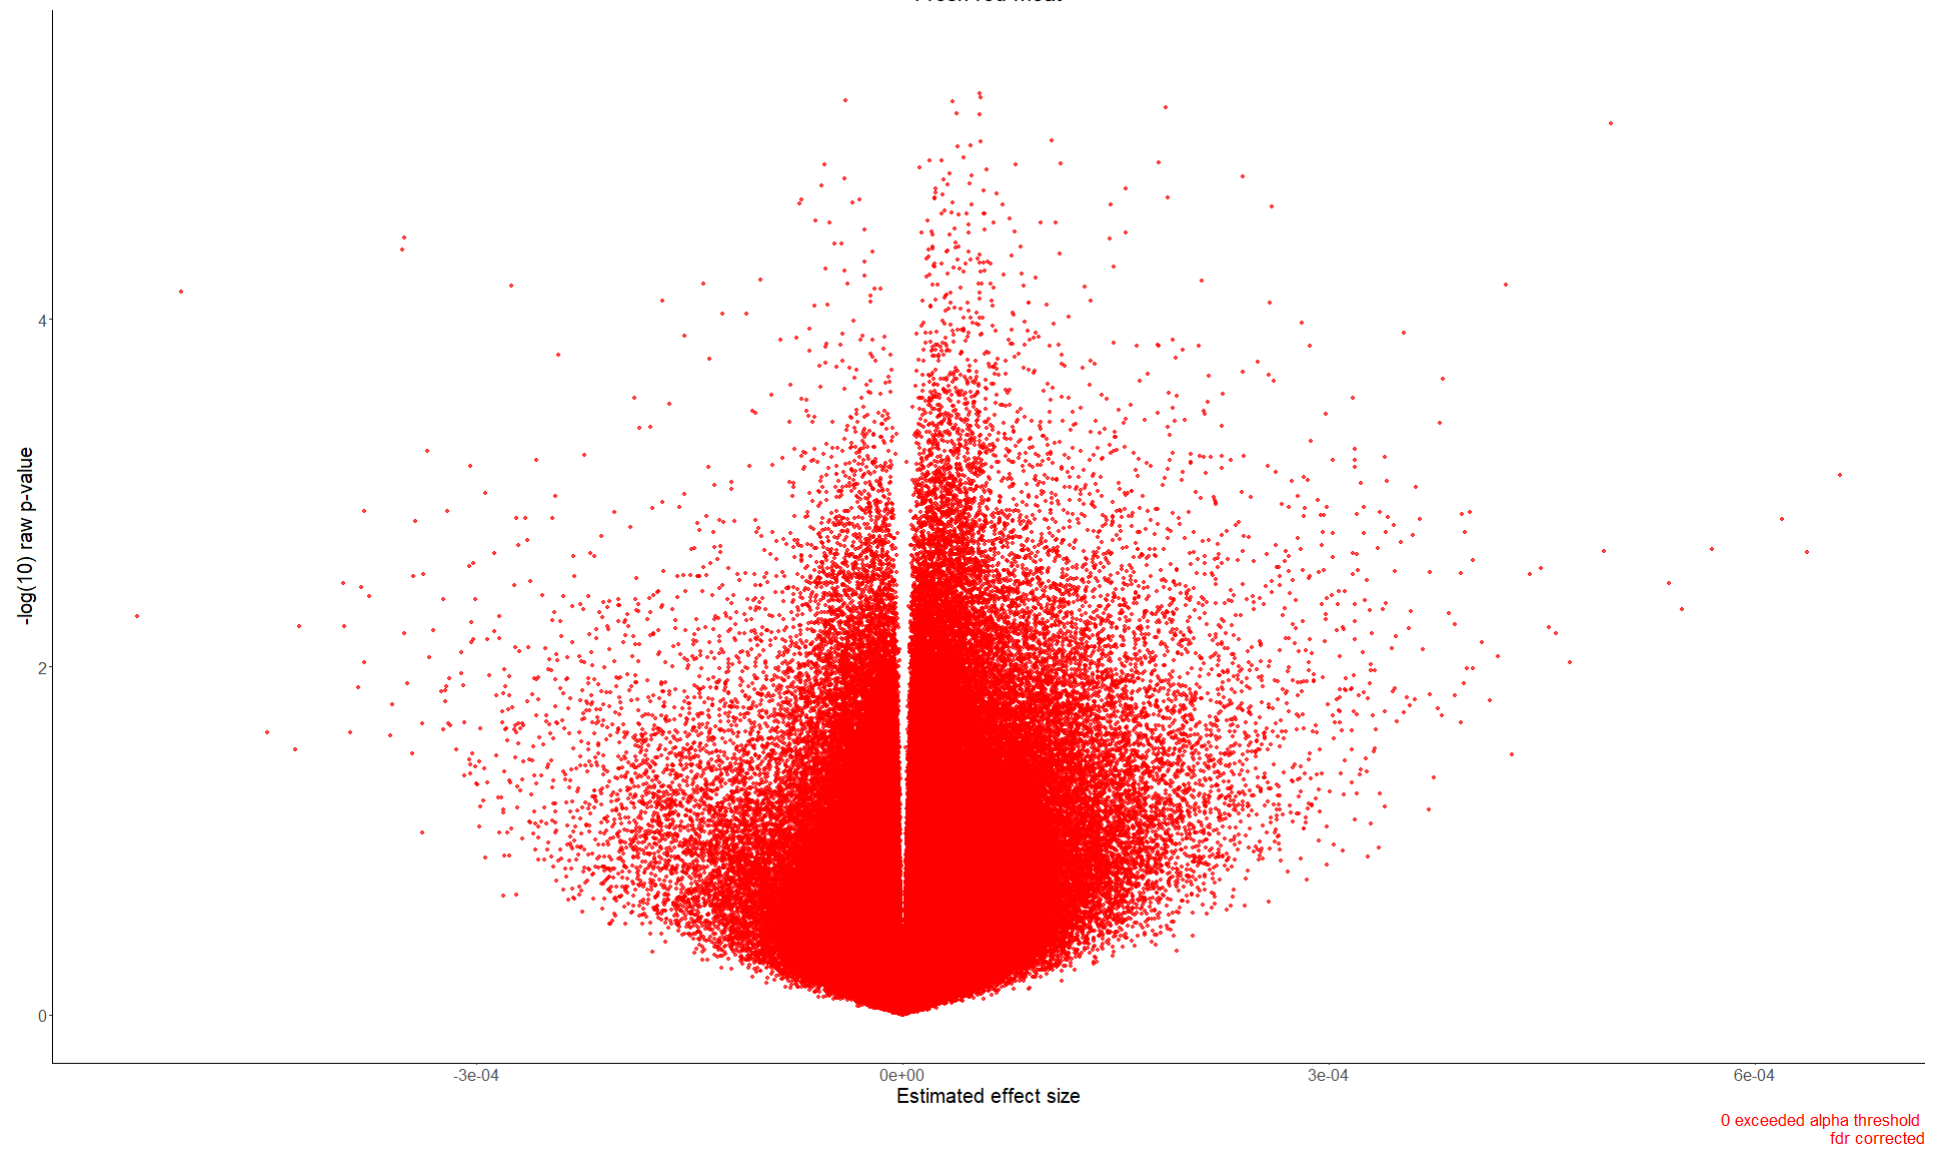

Fig 126

Volcano plot  
Fruit-vegetables

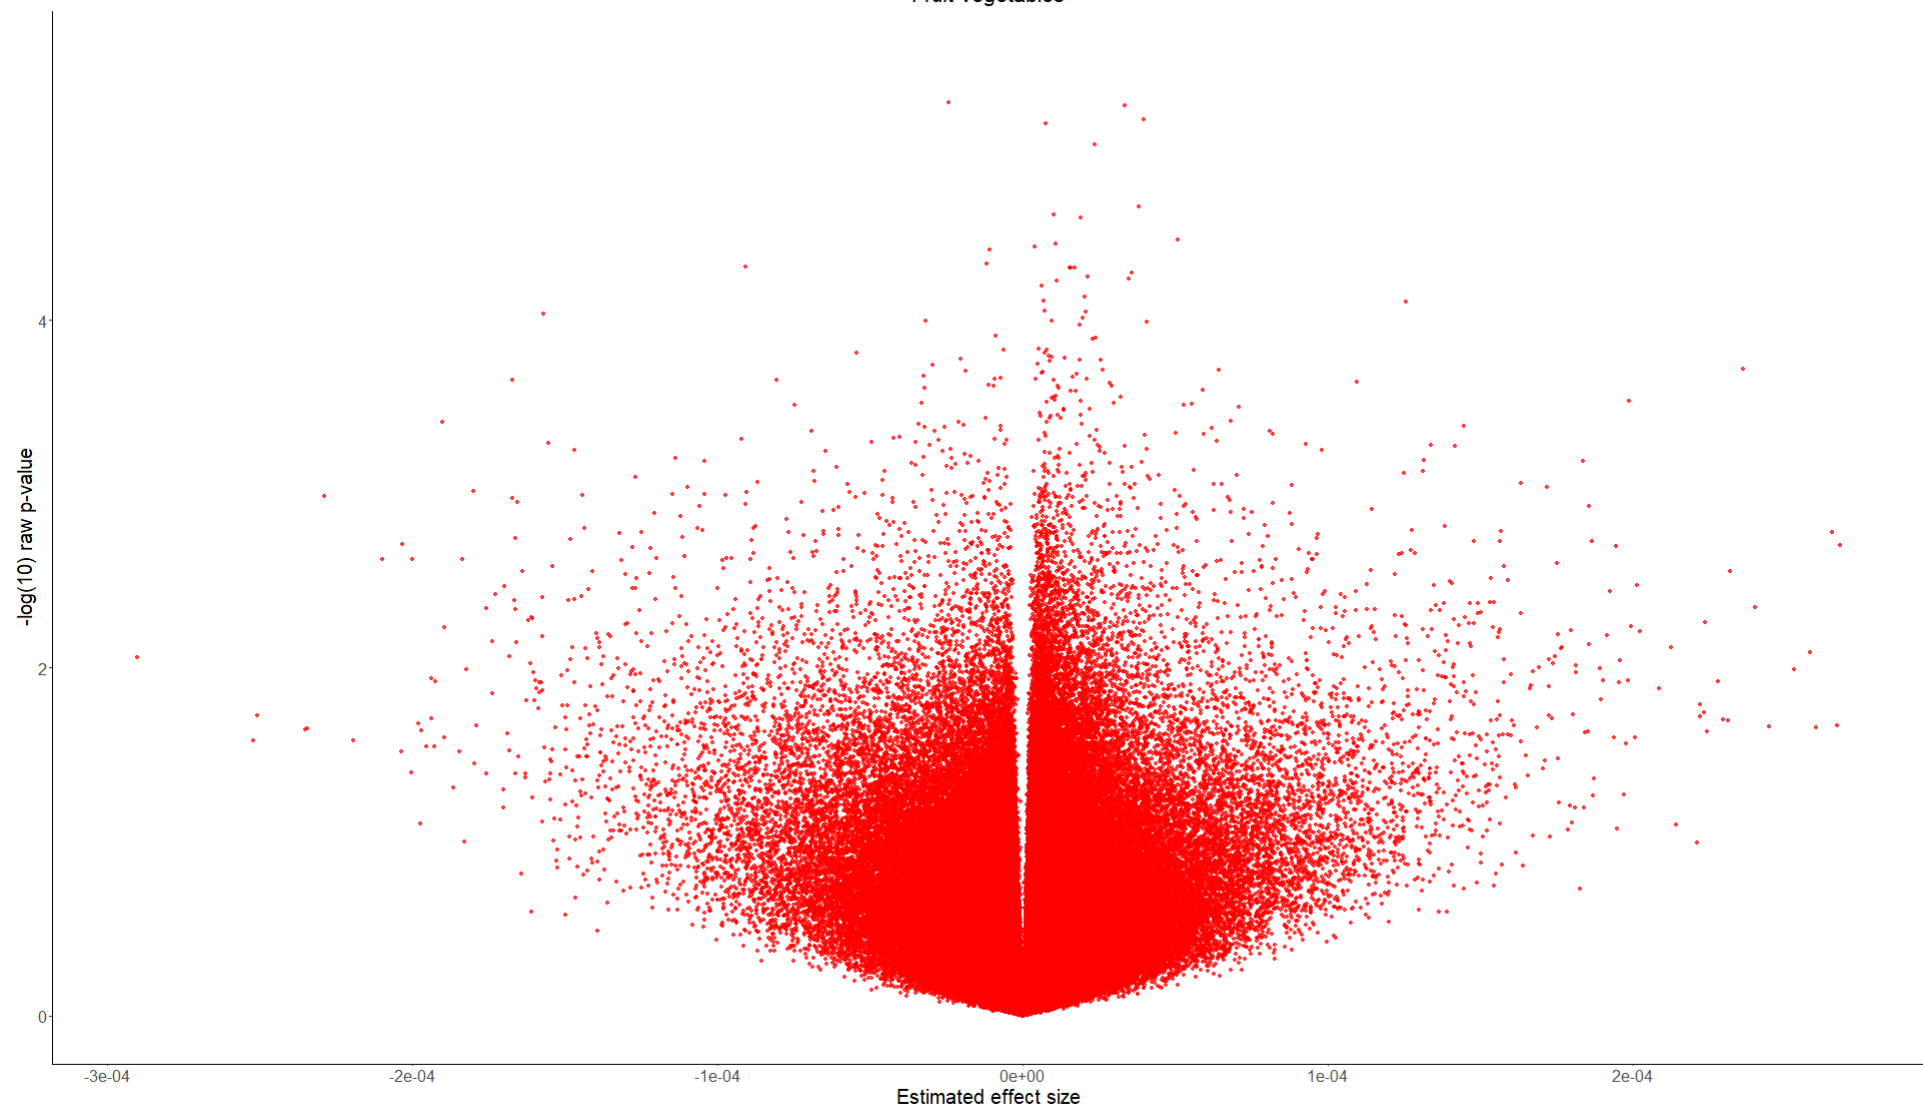

0 exceeded alpha threshold  
fdr corrected

Fig 127

Volcano plot  
Grain-products

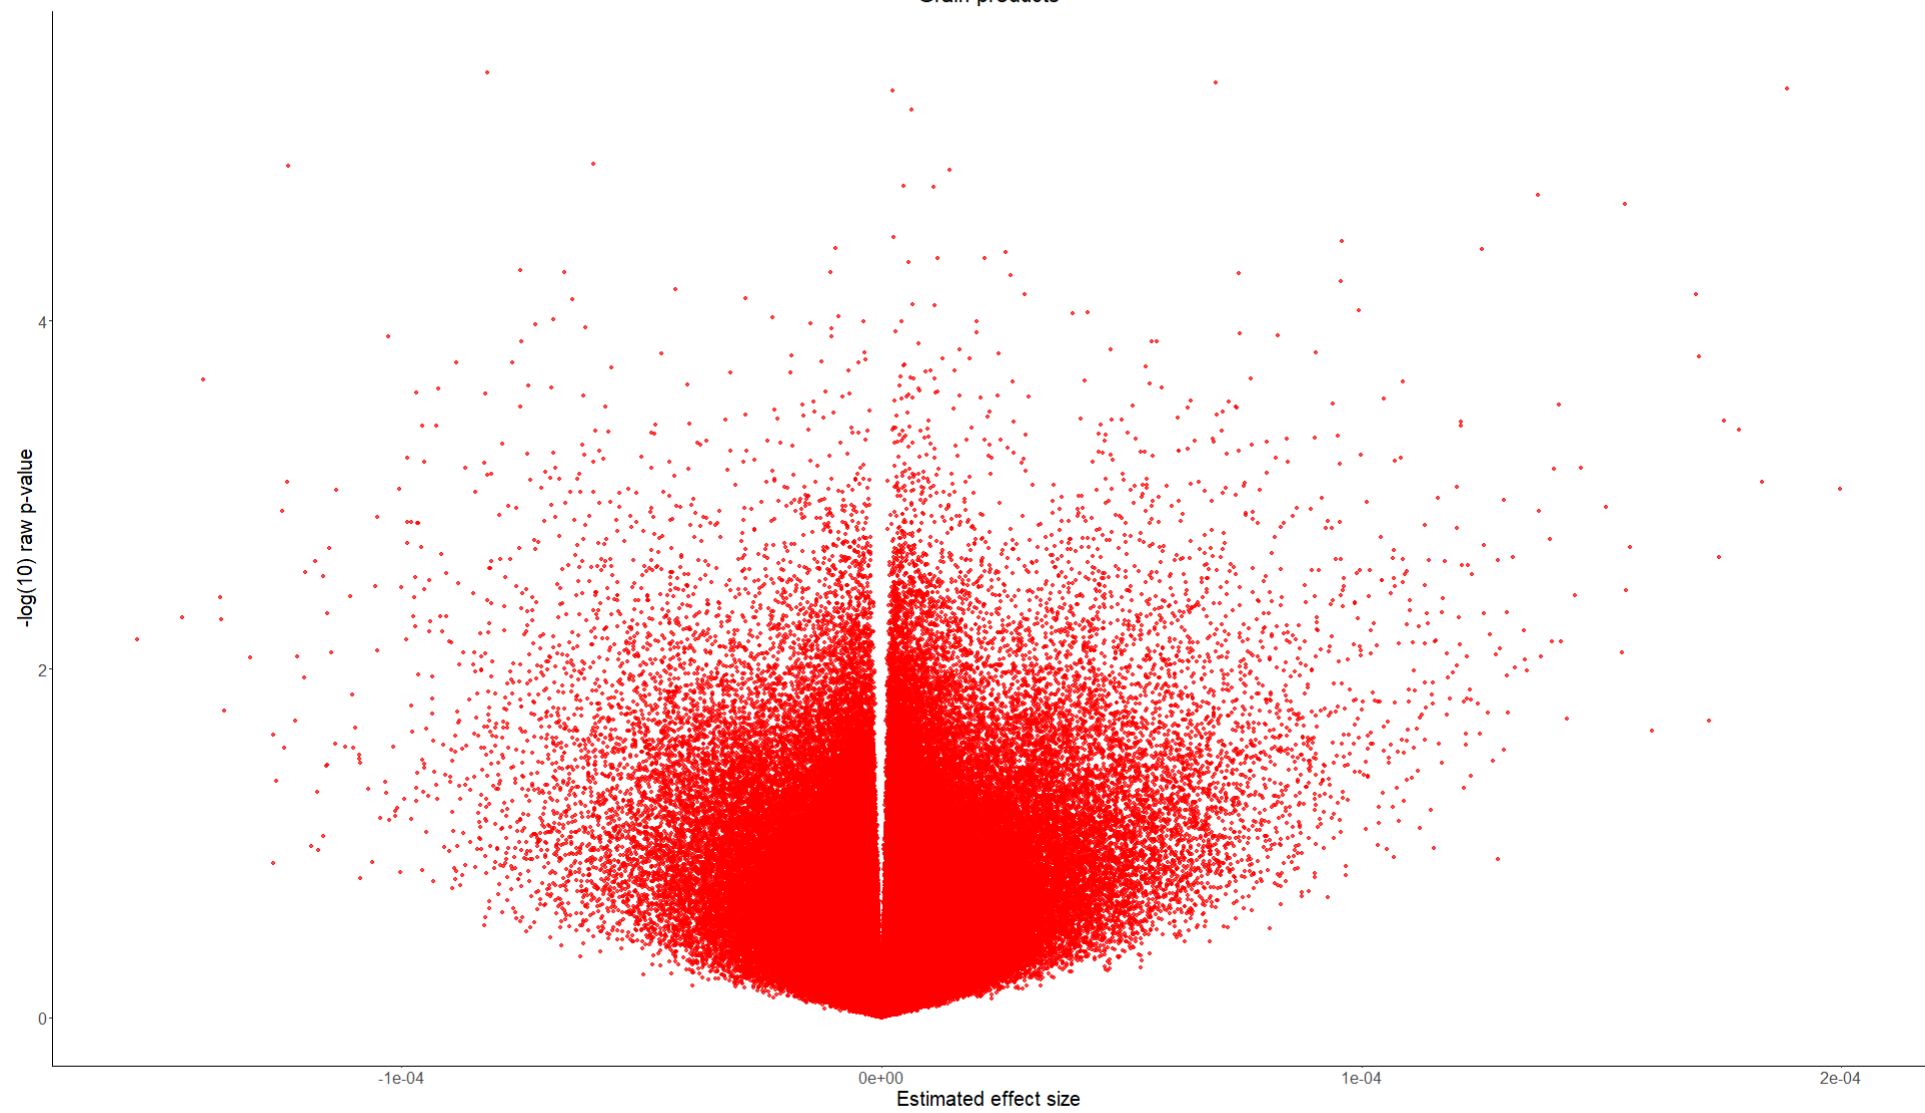

0 exceeded alpha threshold  
fdr corrected

Fig 128

Volcano plot  
HS-CRP

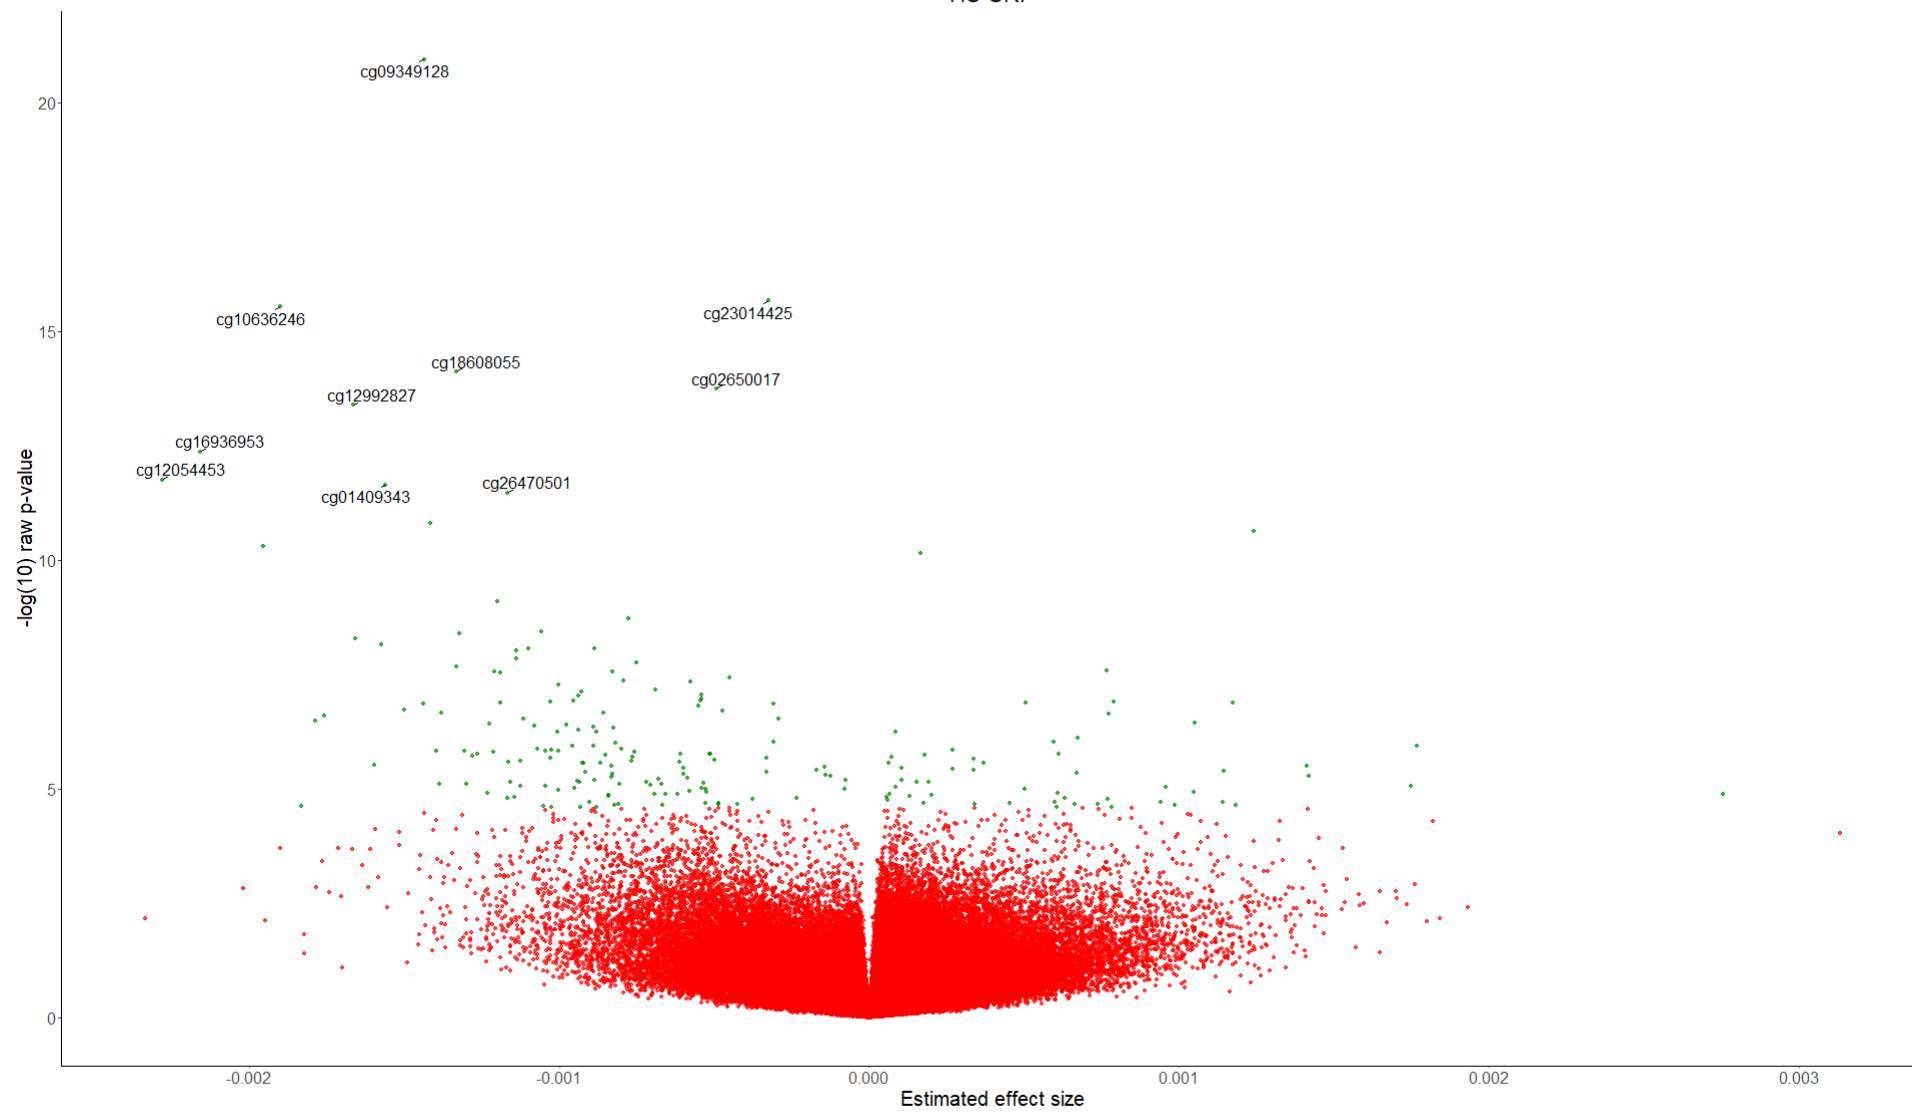

202 exceeded alpha threshold  
fdr corrected



Fig 129

Volcano plot  
Leafy-vegetables

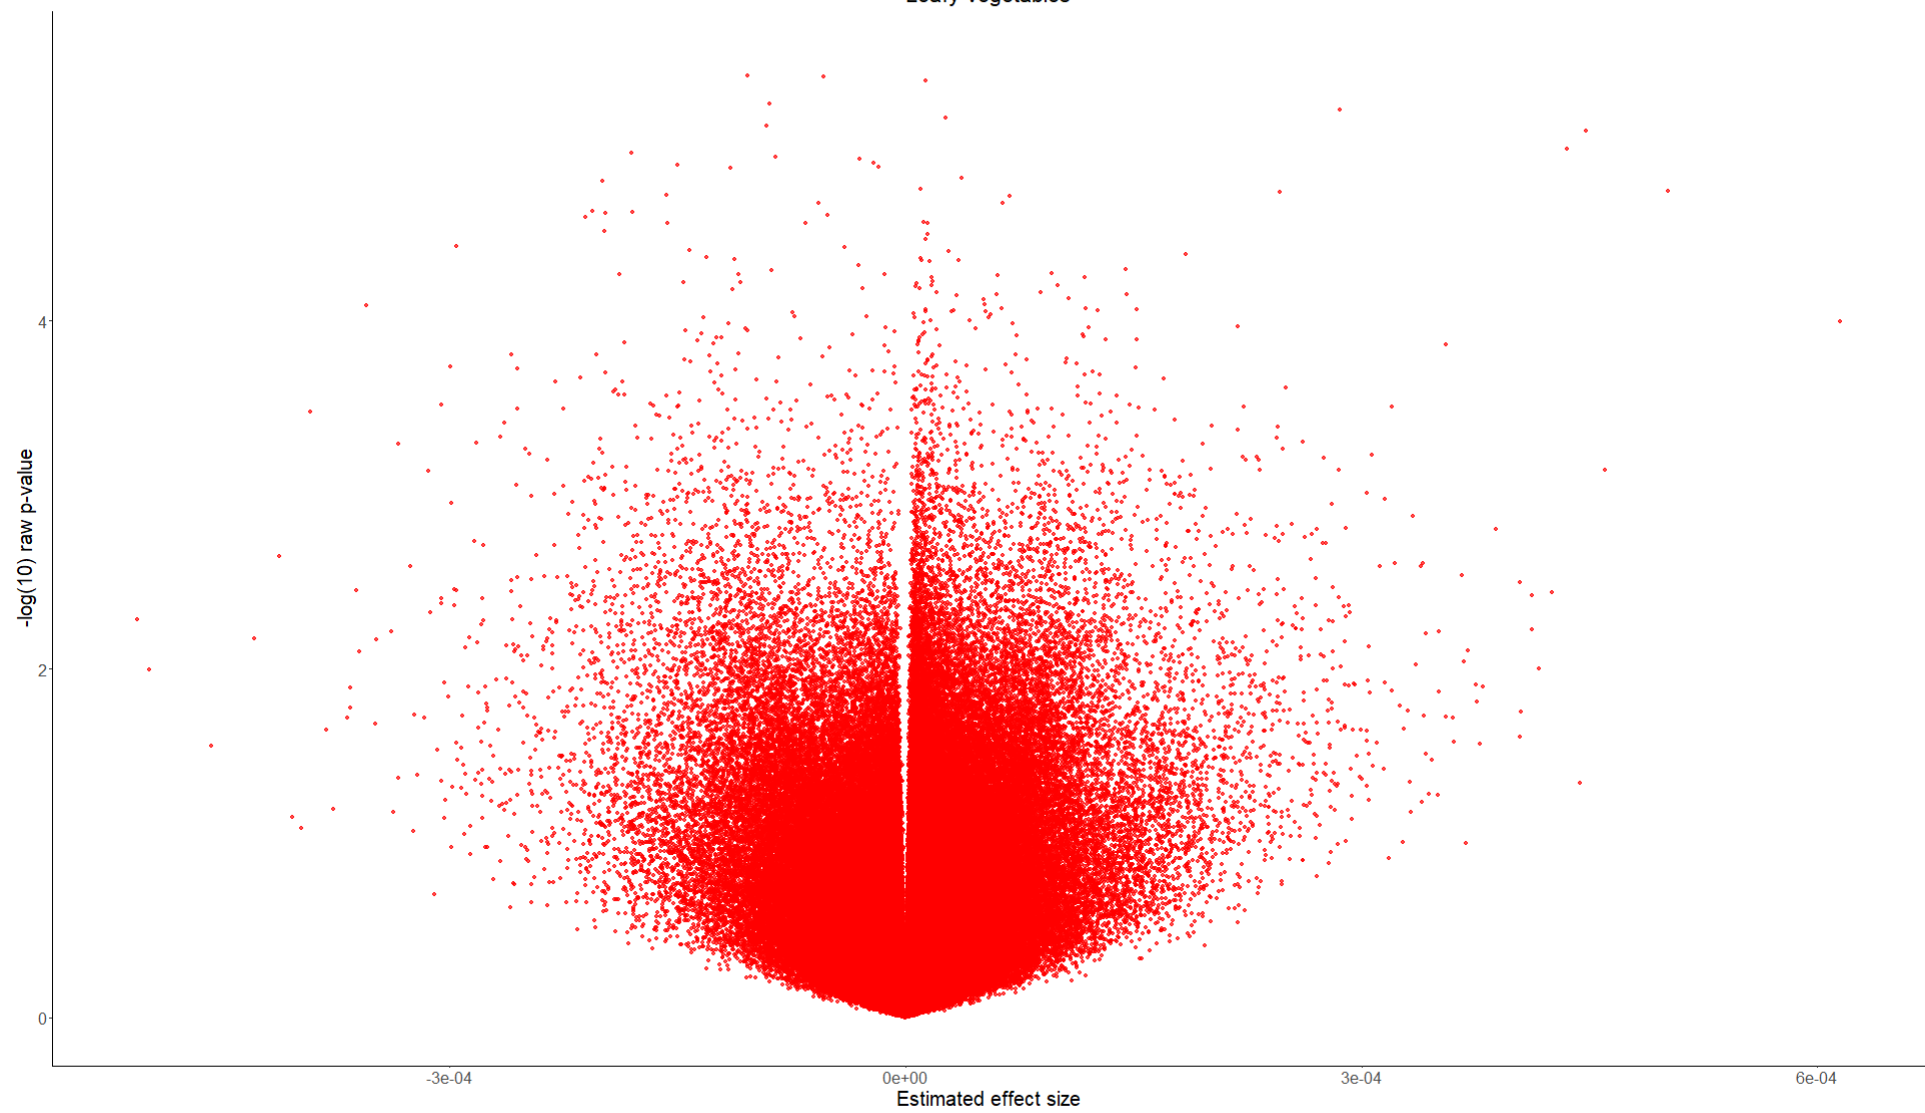

0 exceeded alpha threshold  
fdr corrected

Fig 130

Volcano plot  
Legumes

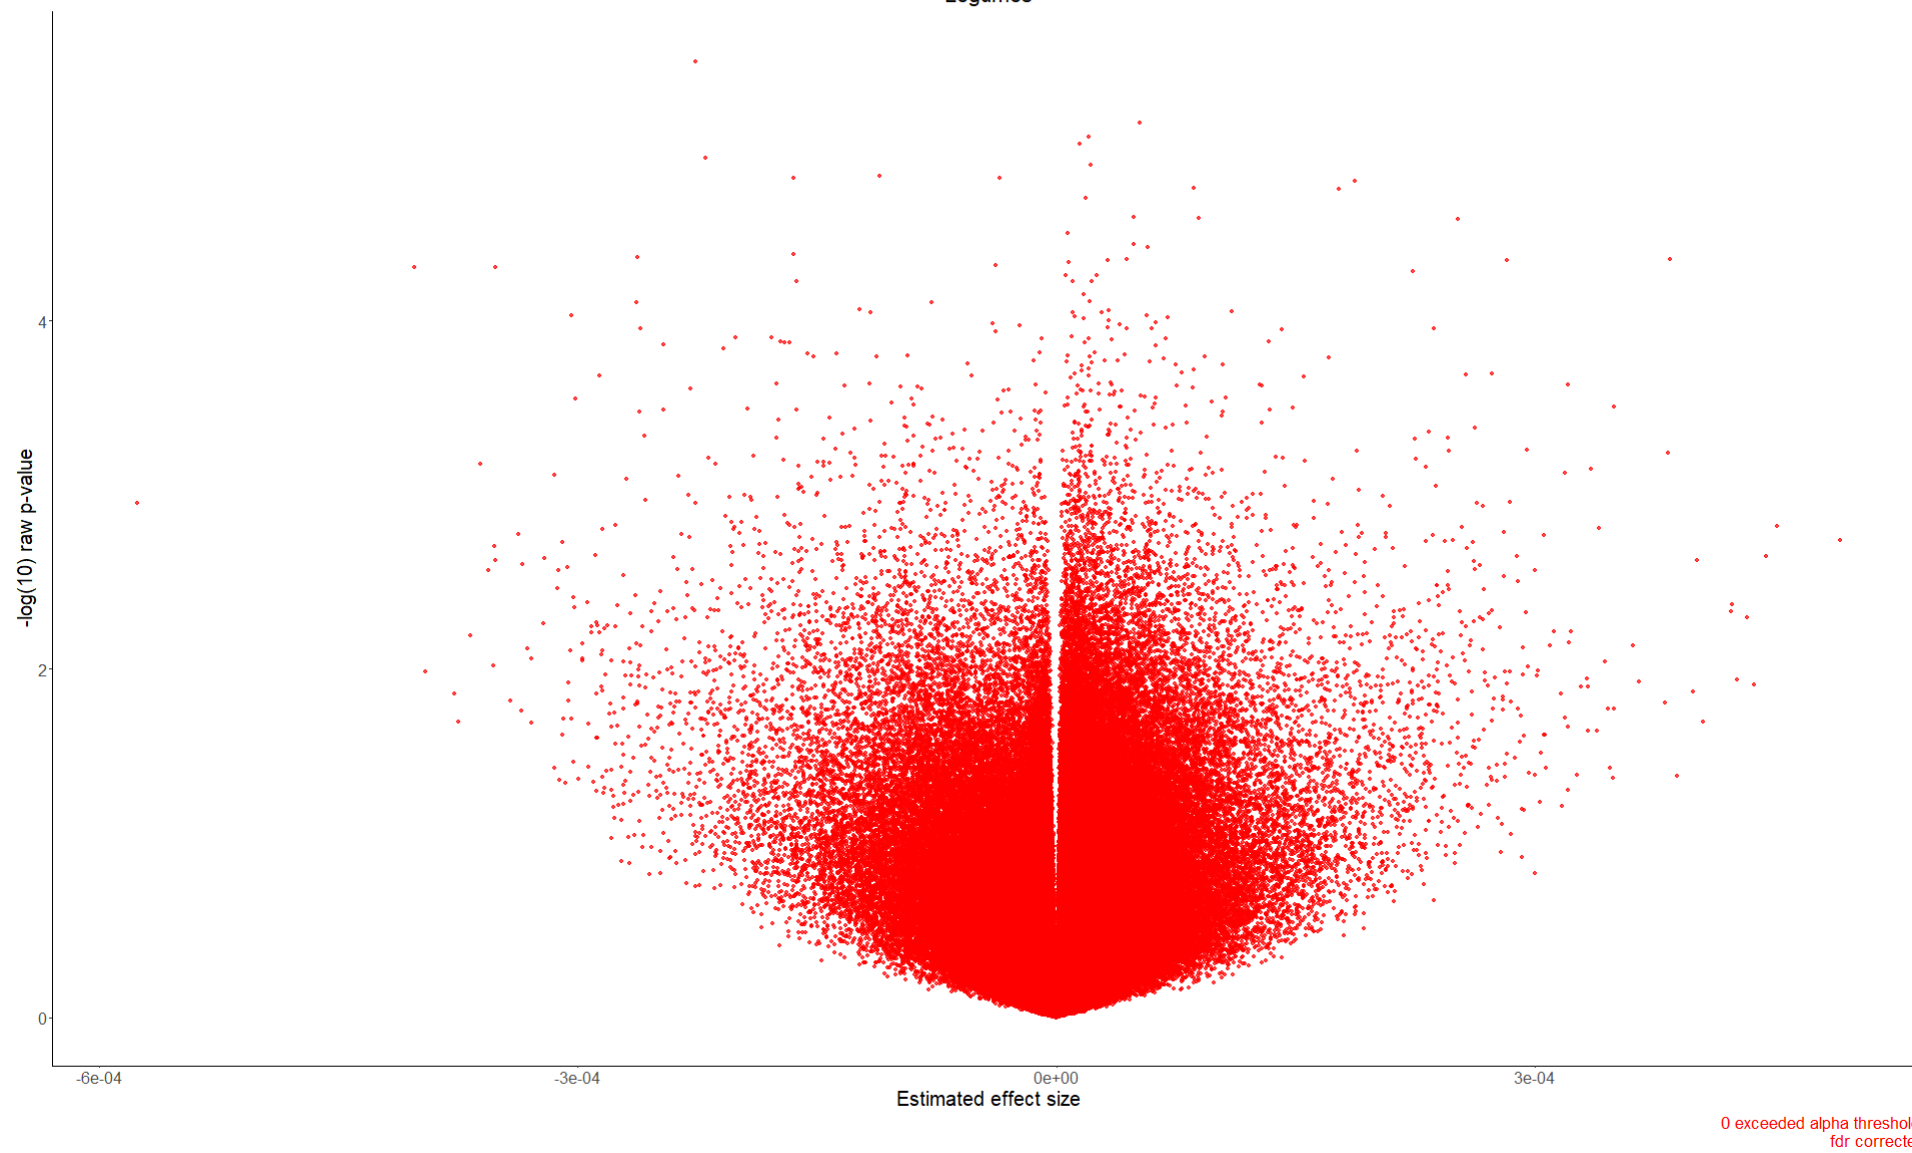

Fig 131

Volcano plot  
Margarine

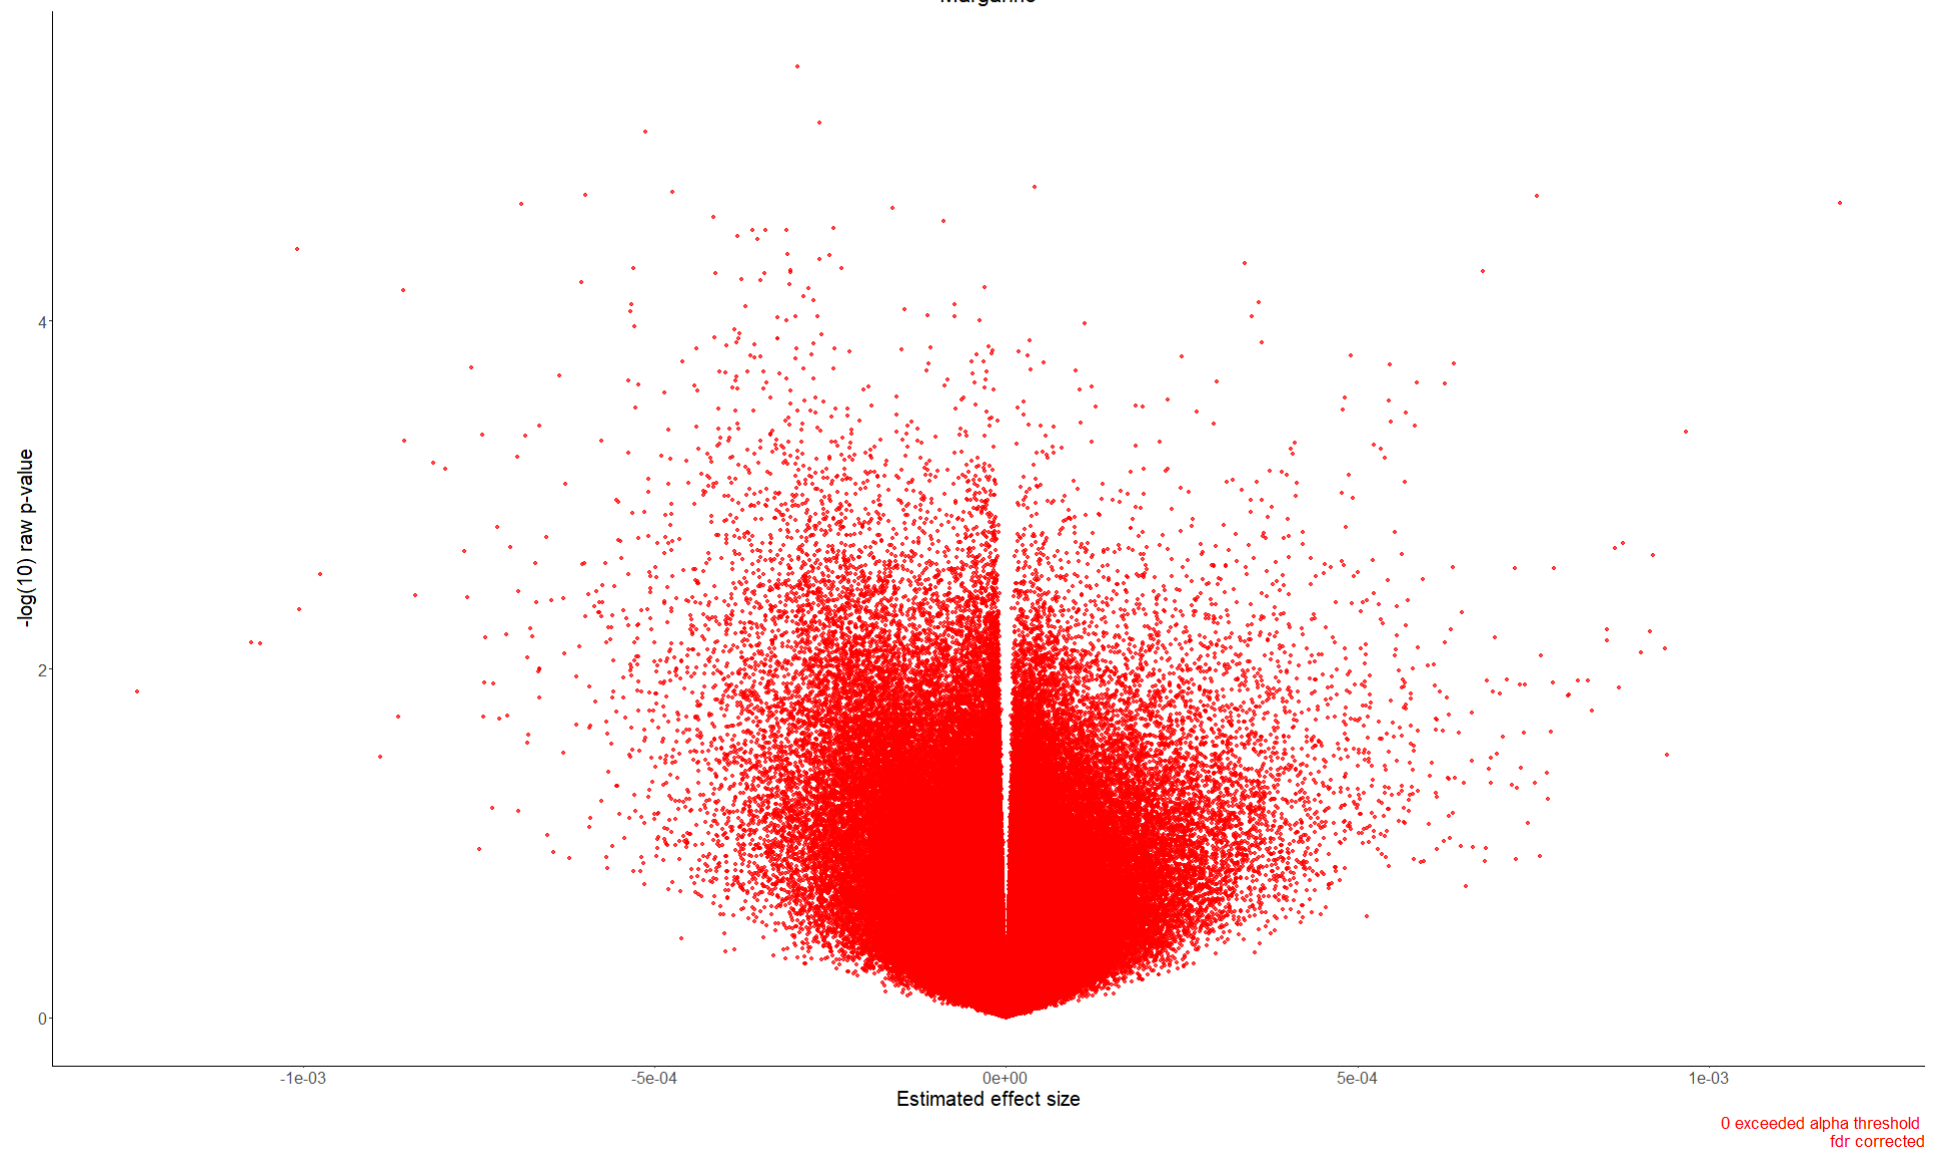

Fig 132

# Volcano plot MDS

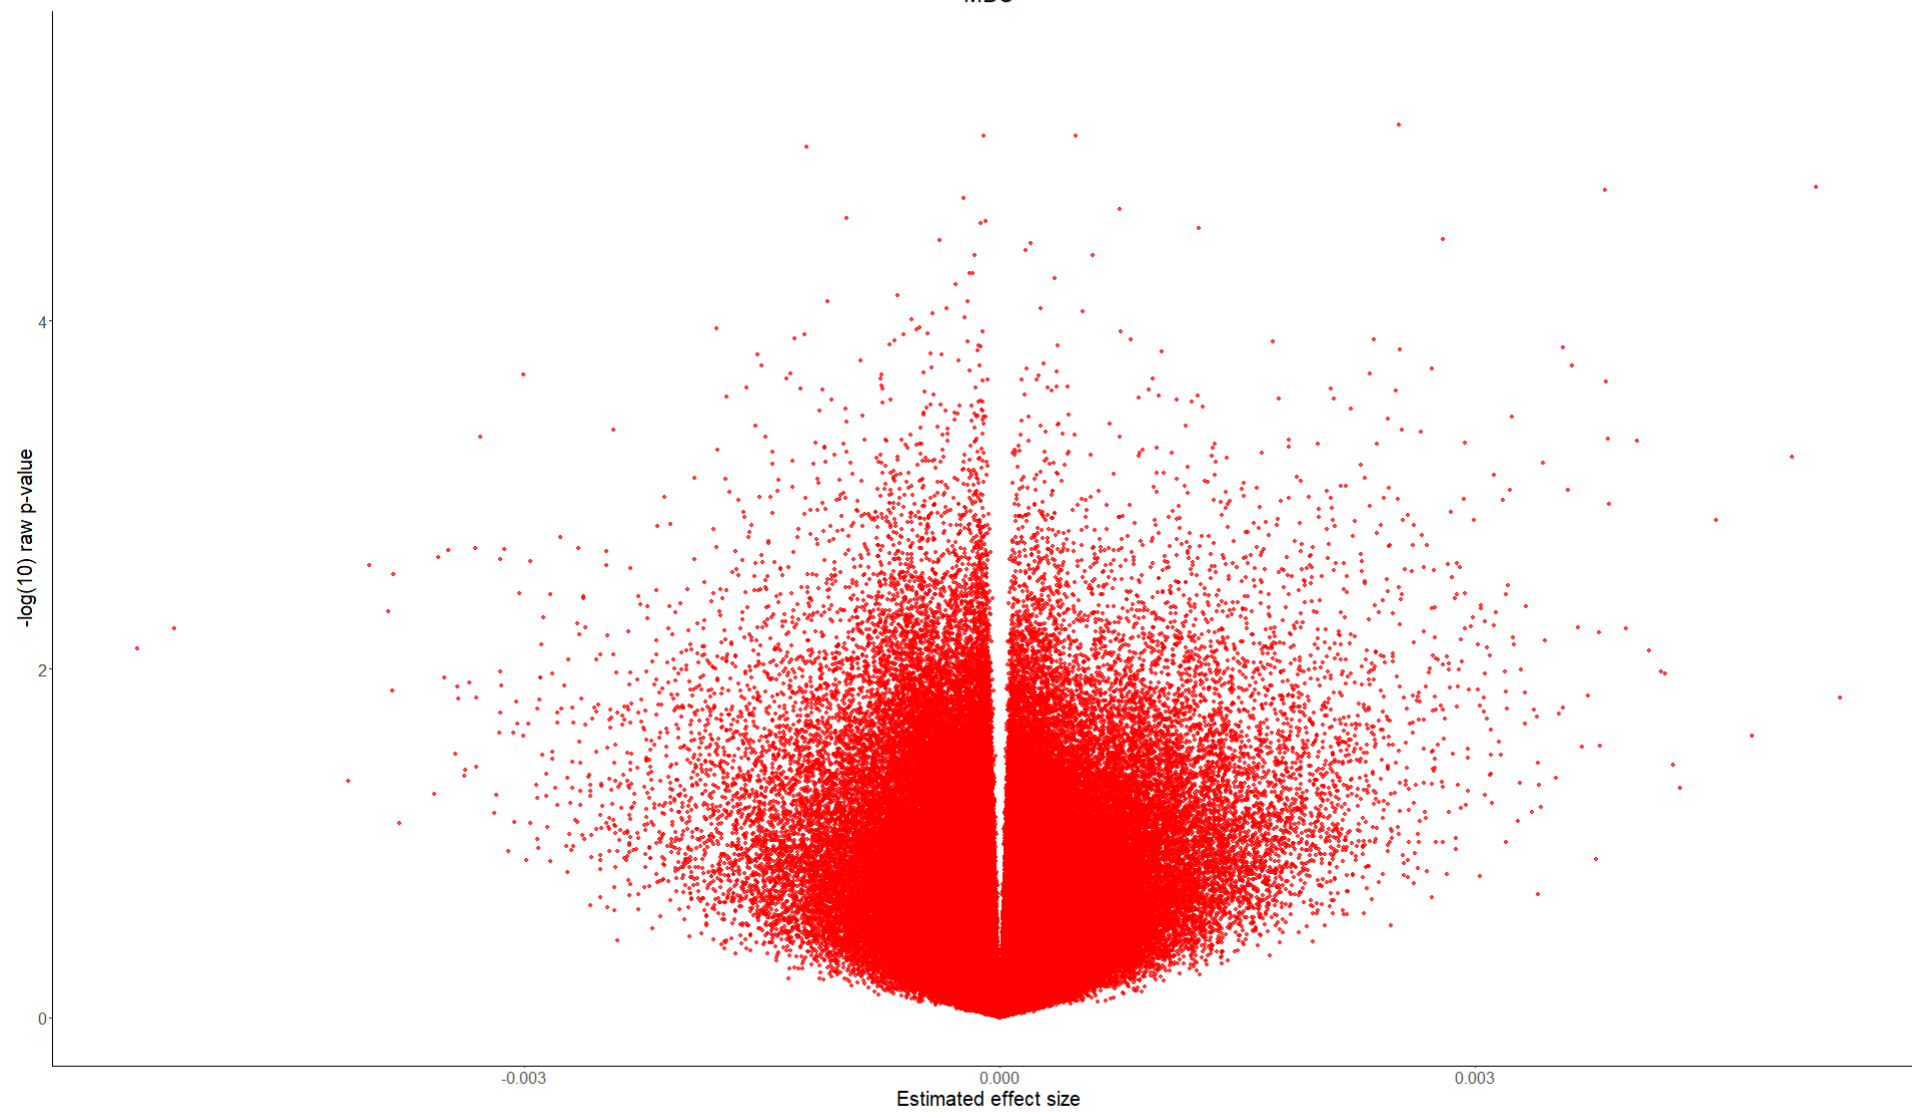

0 exceeded alpha threshold  
fdr corrected

Fig 133

# Volcano plot Milk

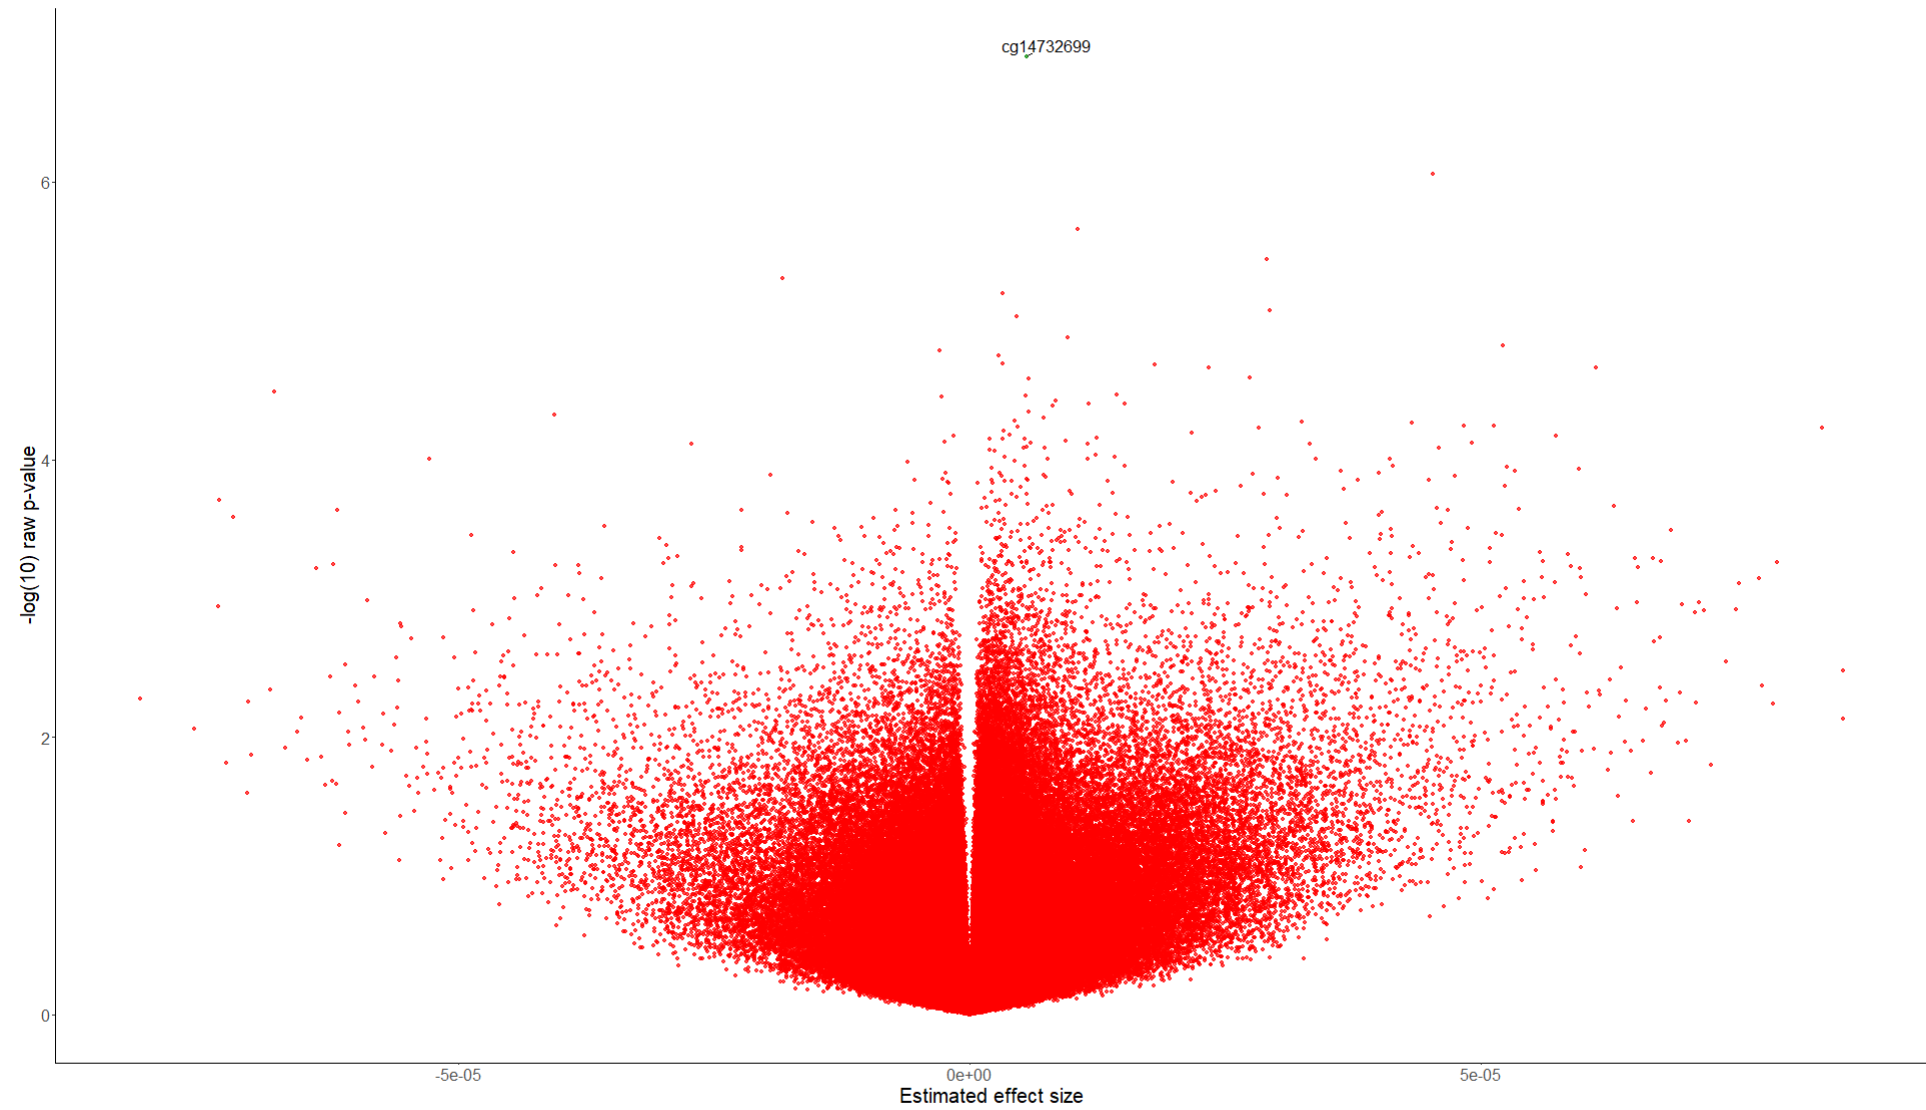

1 exceeded alpha threshold  
fdr corrected

Fig 134

Volcano plot  
Nuts-seeds

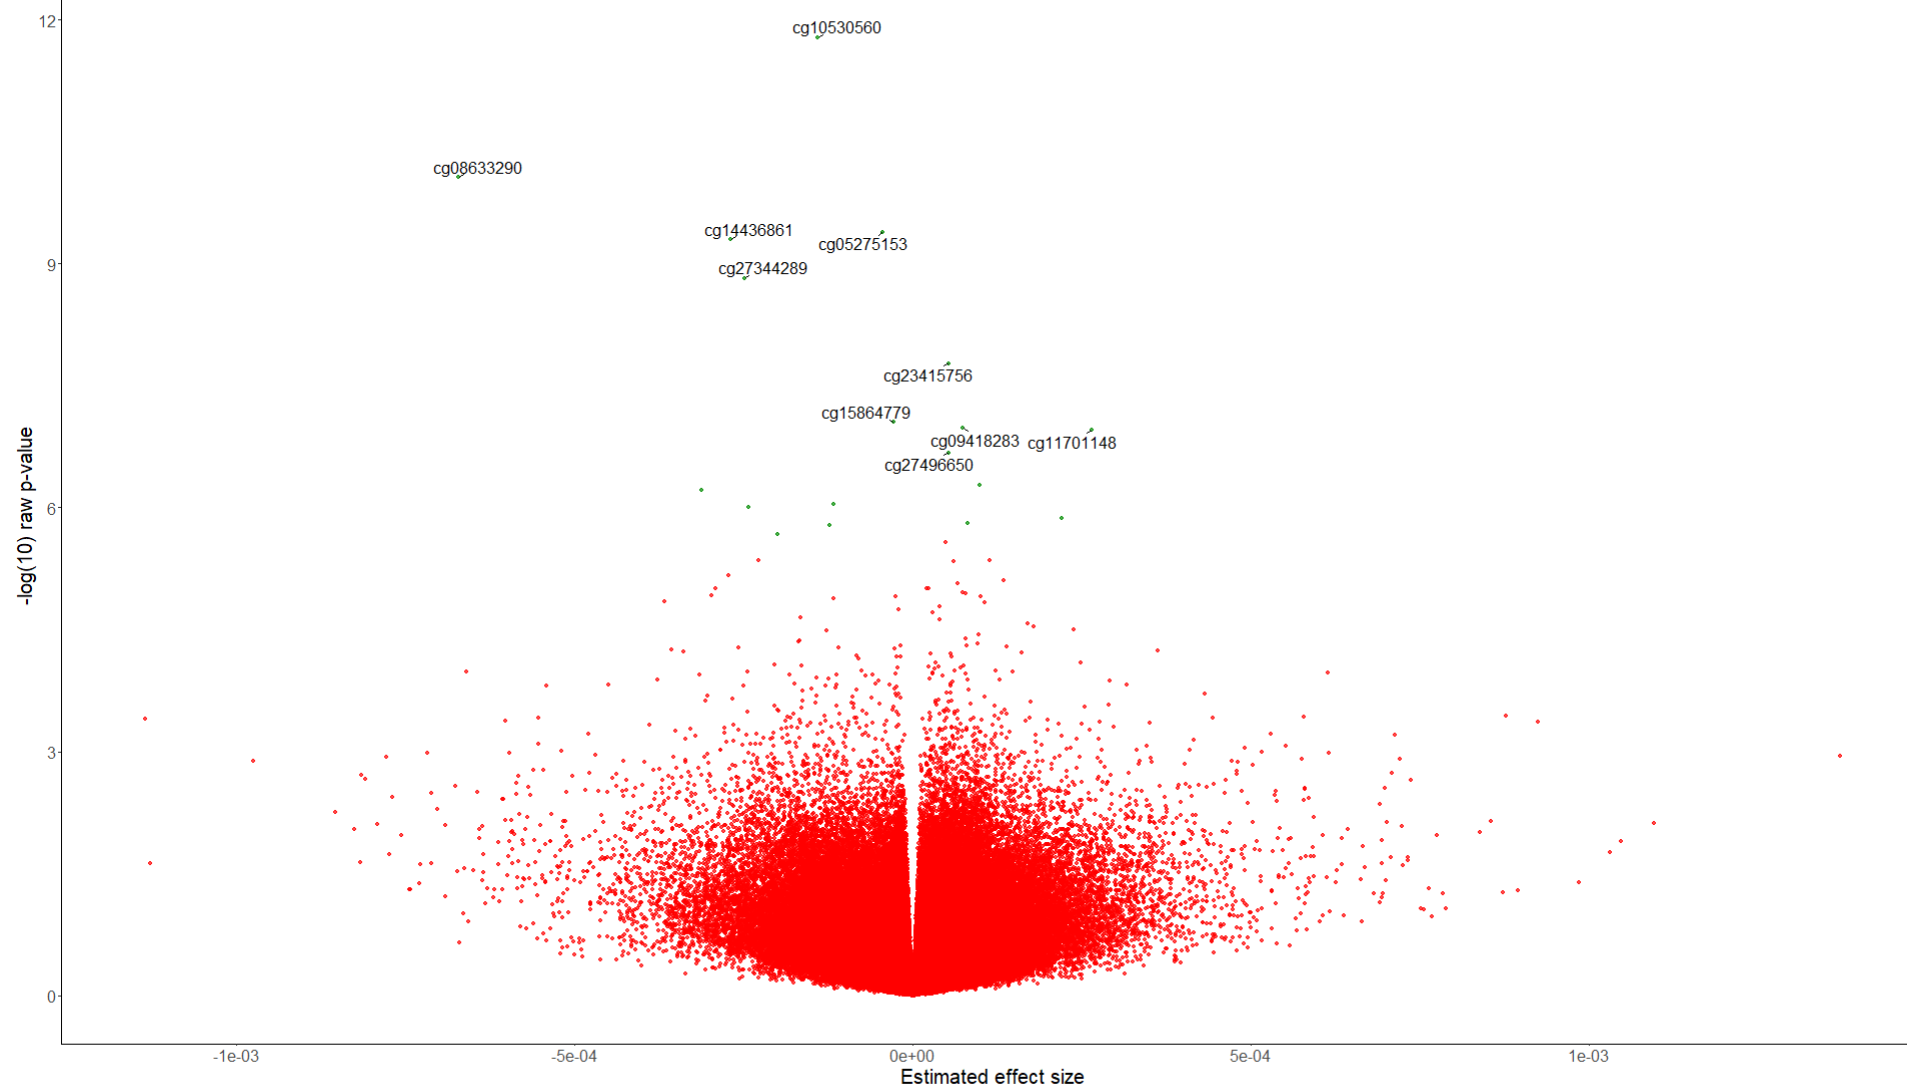

18 exceeded alpha threshold  
fdr corrected

Fig 135

Volcano plot  
Onions-garlic

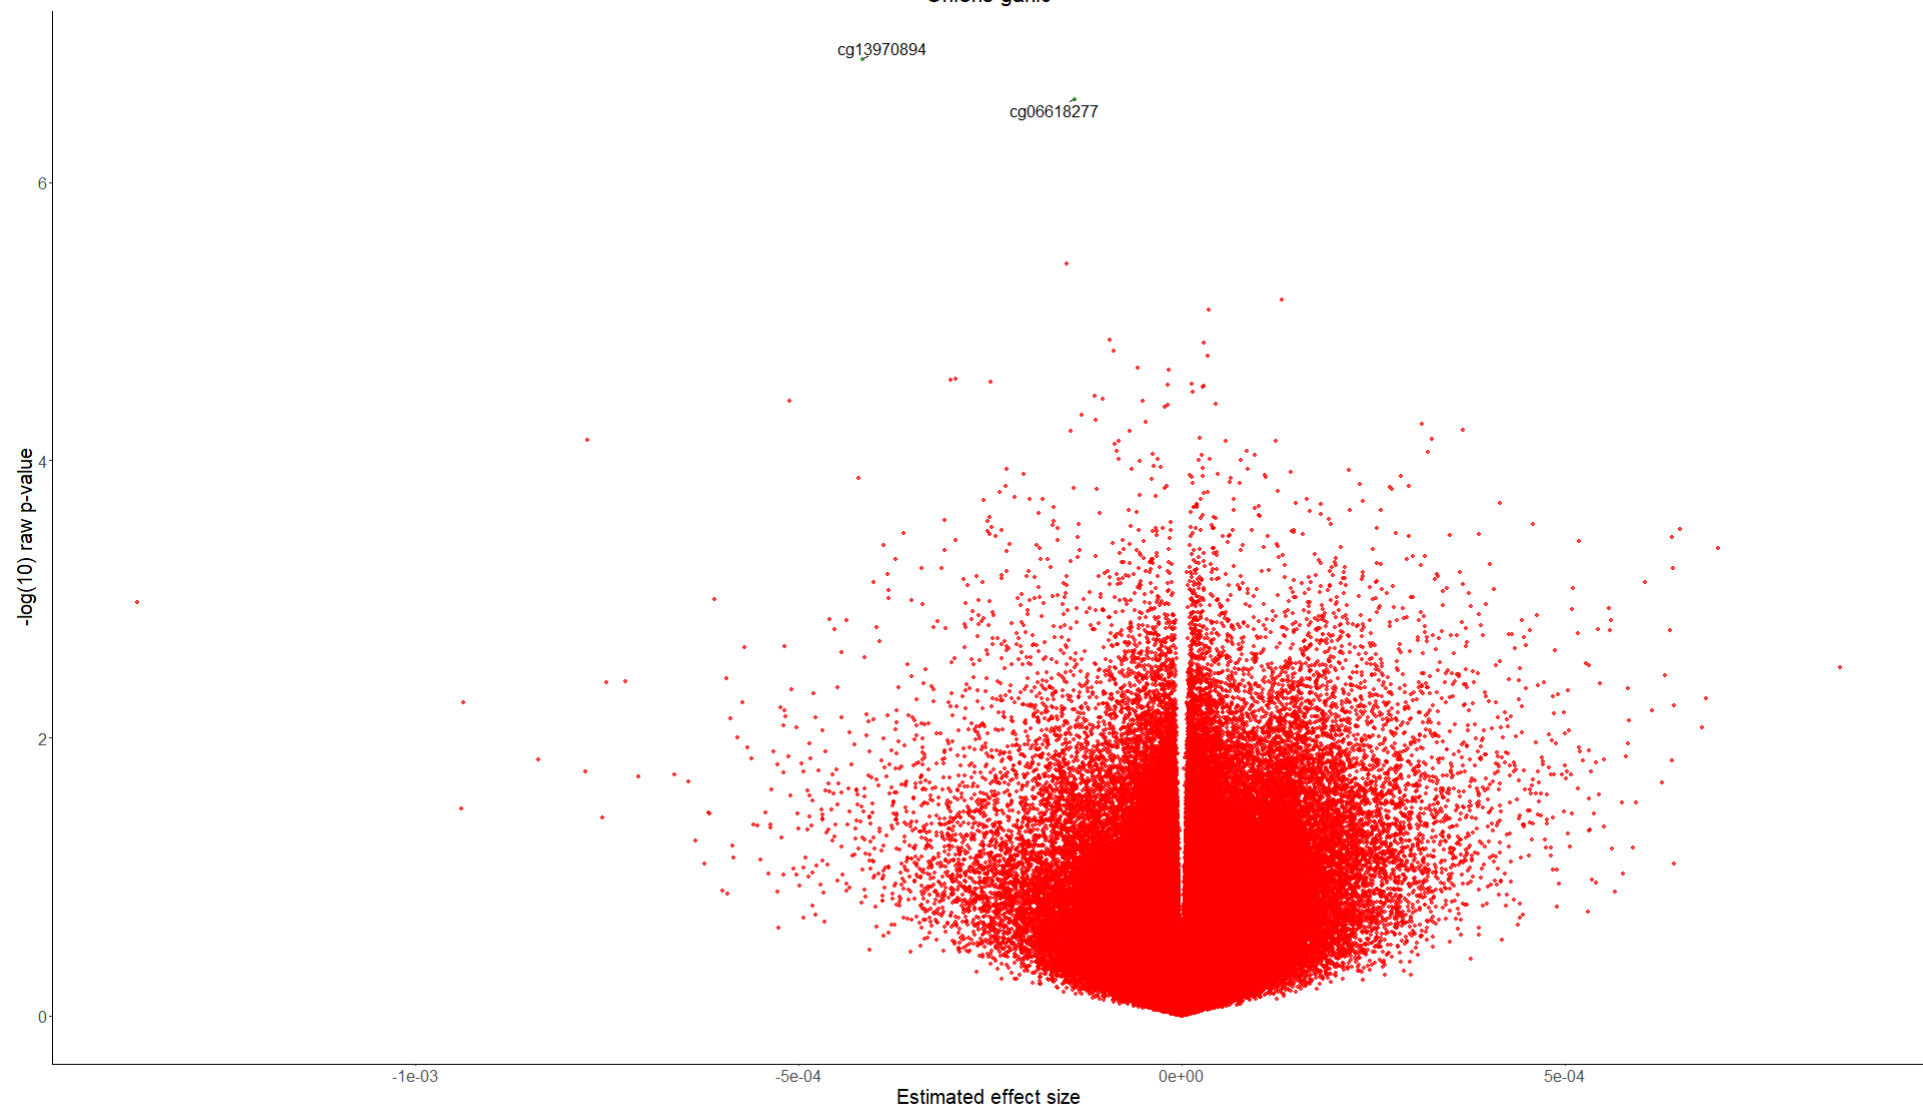

2 exceeded alpha threshold  
fdr corrected

Fig 136

# Volcano plot Plant-oils

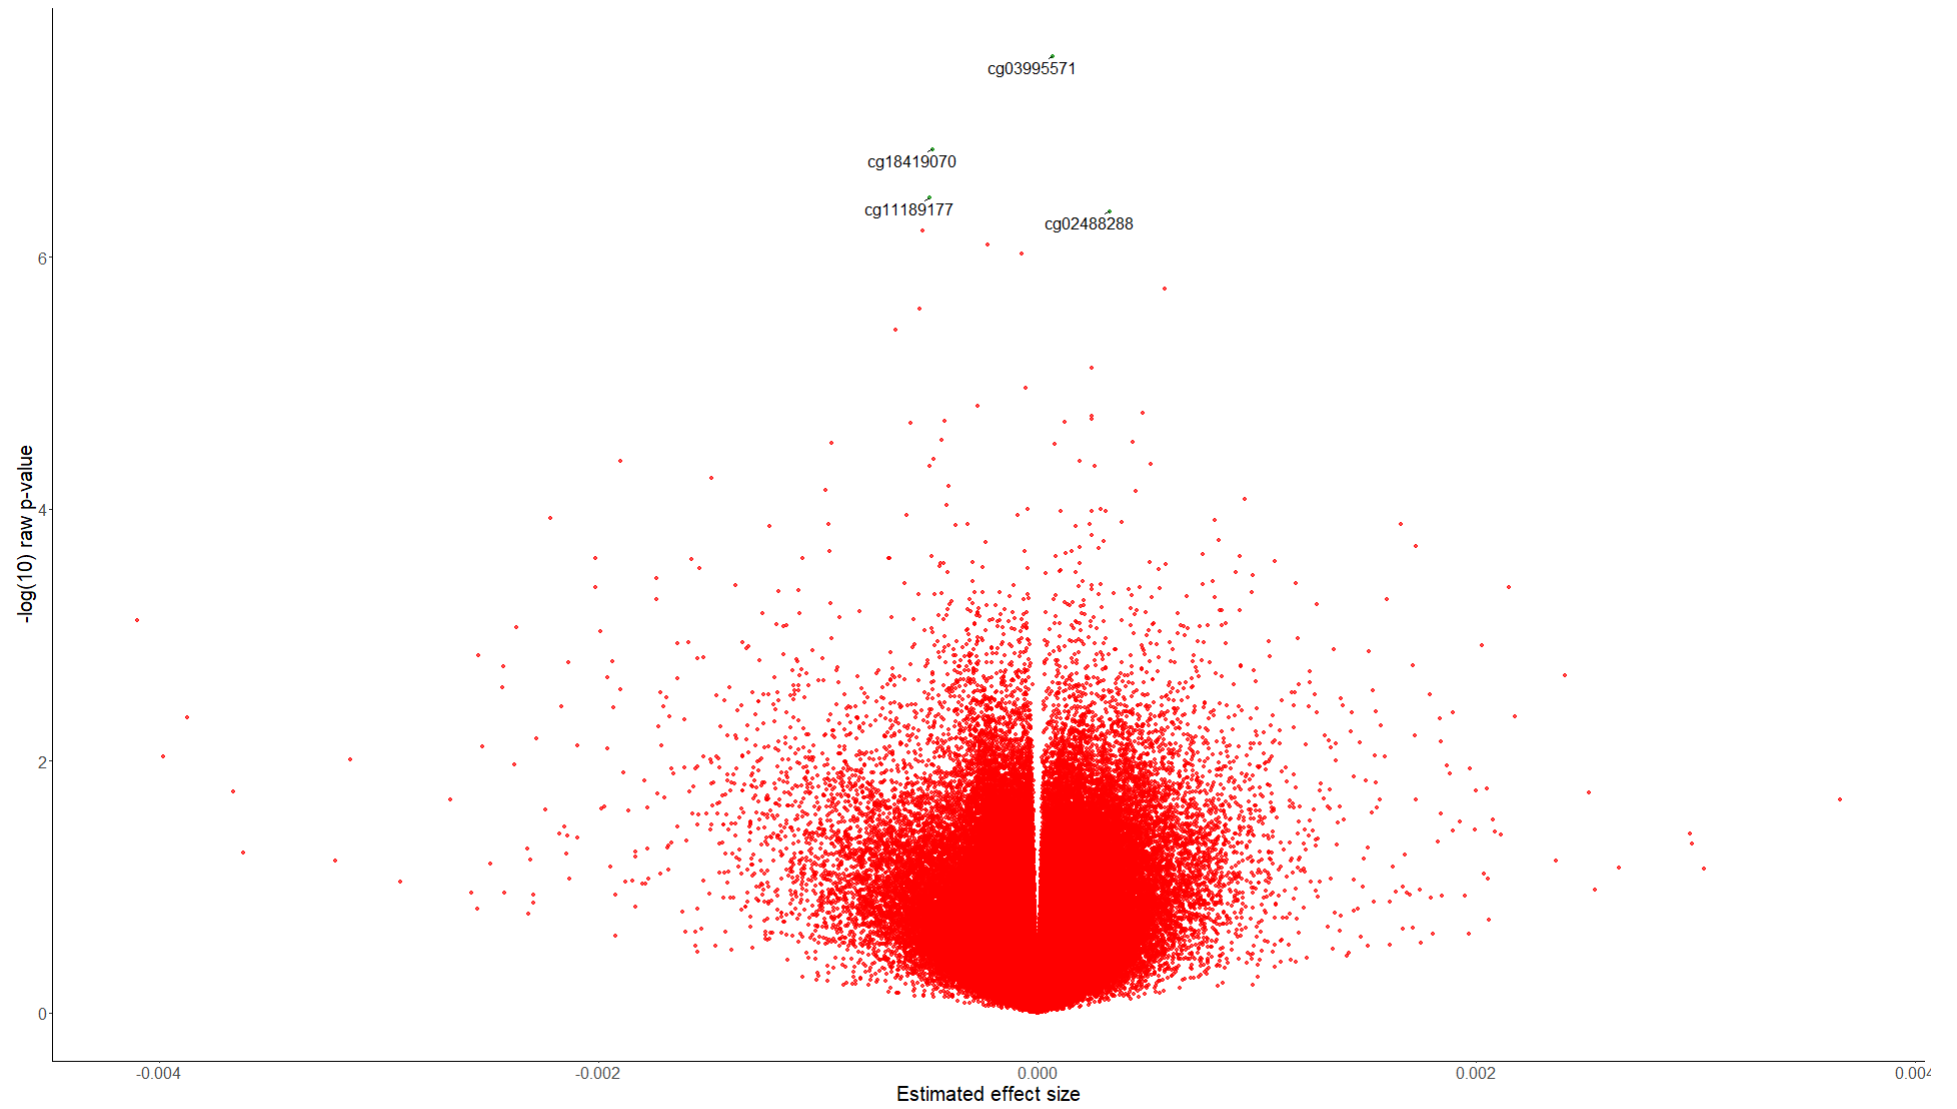



Fig 137

Volcano plot  
Potatoes

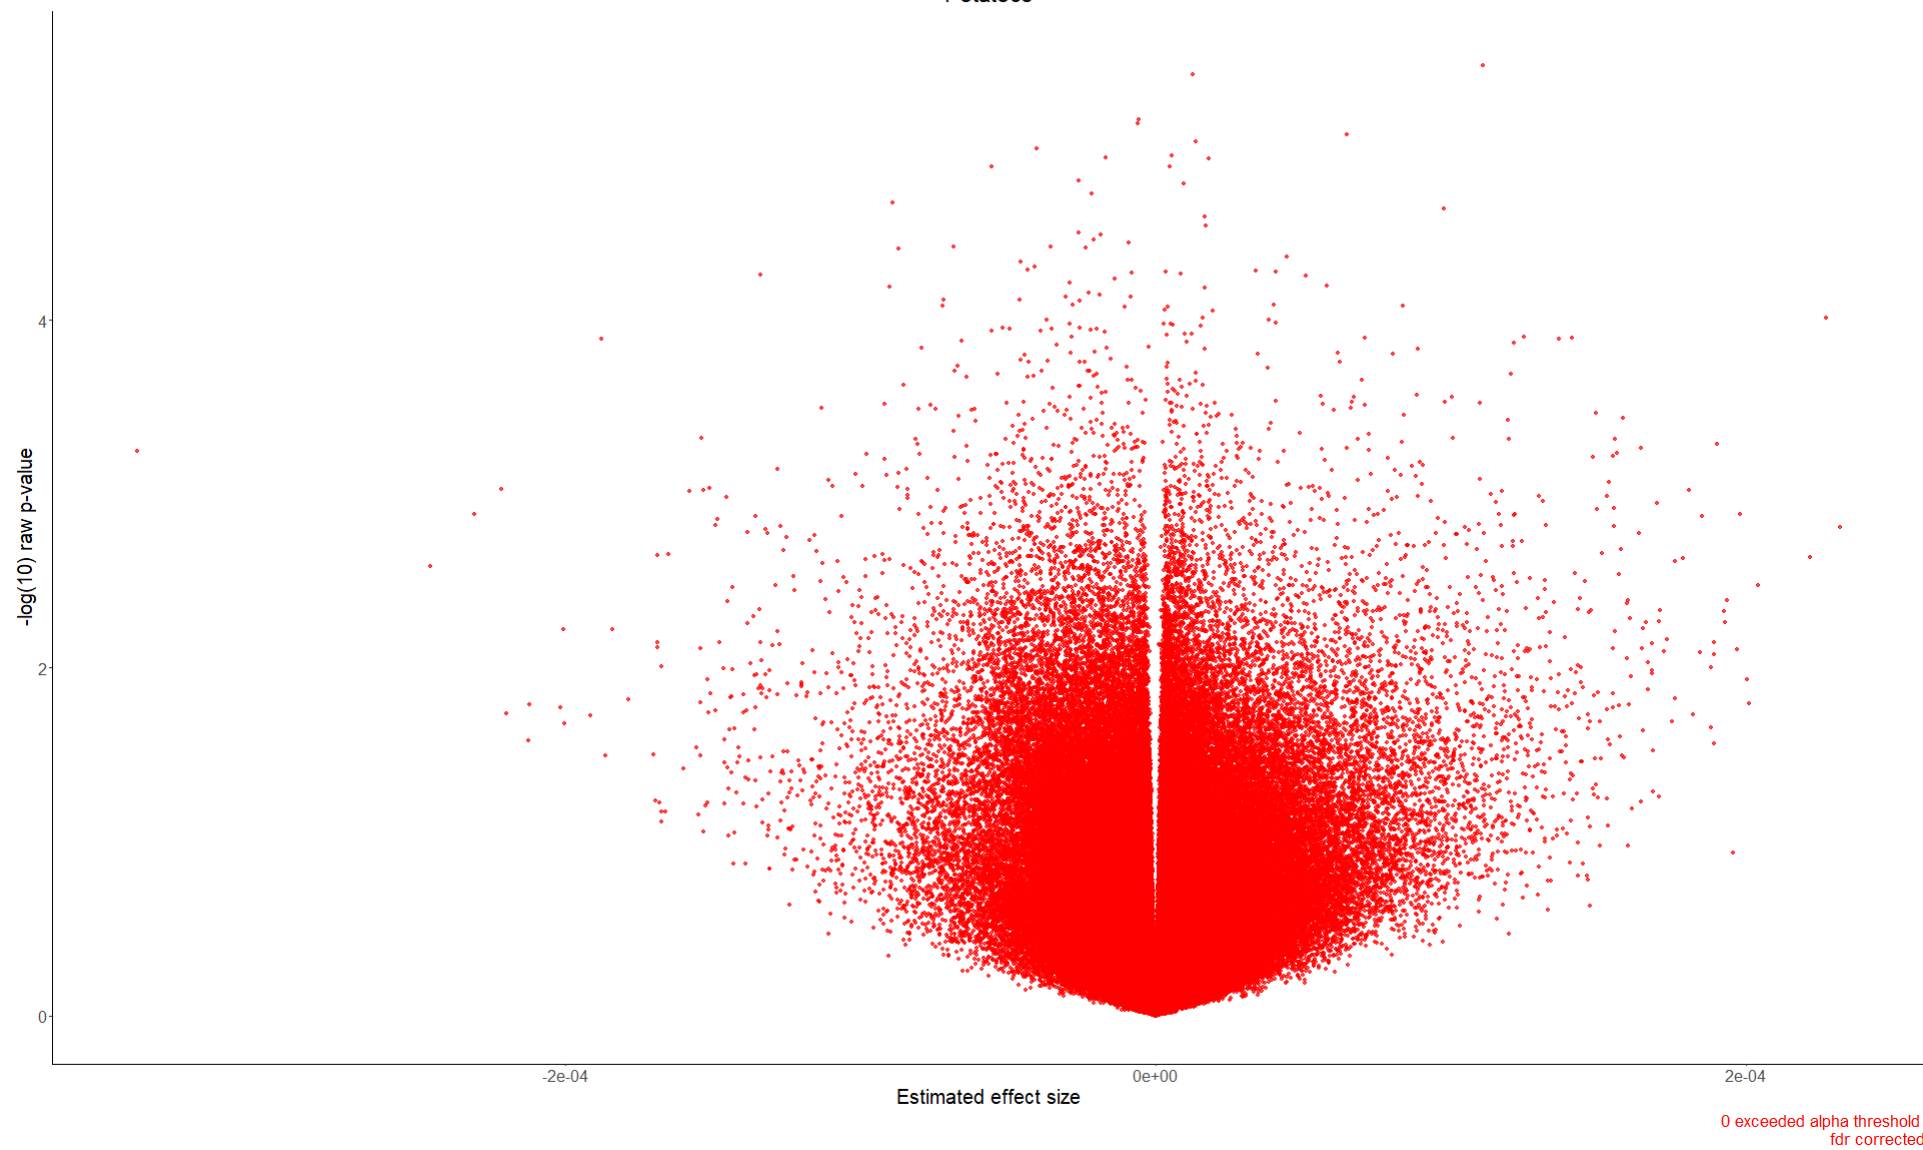

Fig 138

Volcano plot  
Processed-meat

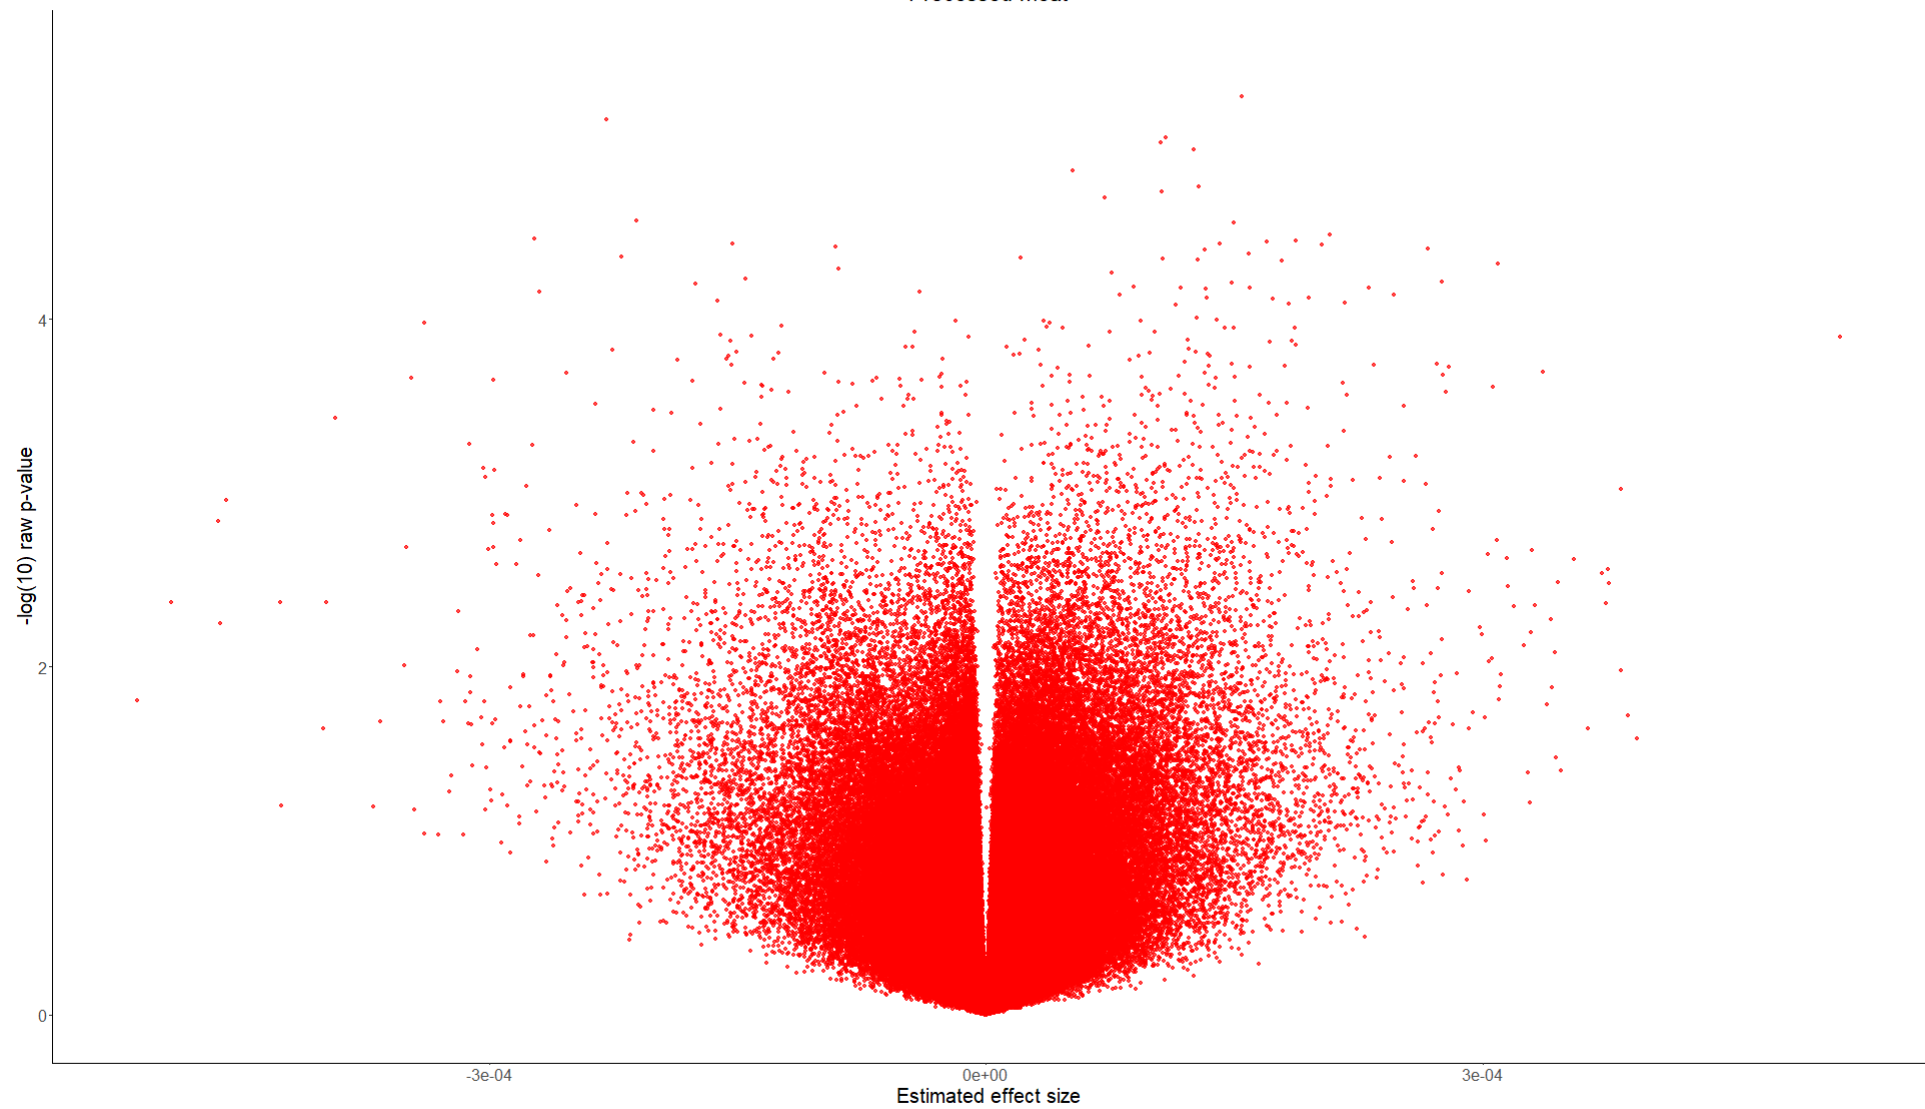

0 exceeded alpha threshold  
fdr corrected

Fig 139

Volcano plot  
Root-vegetables

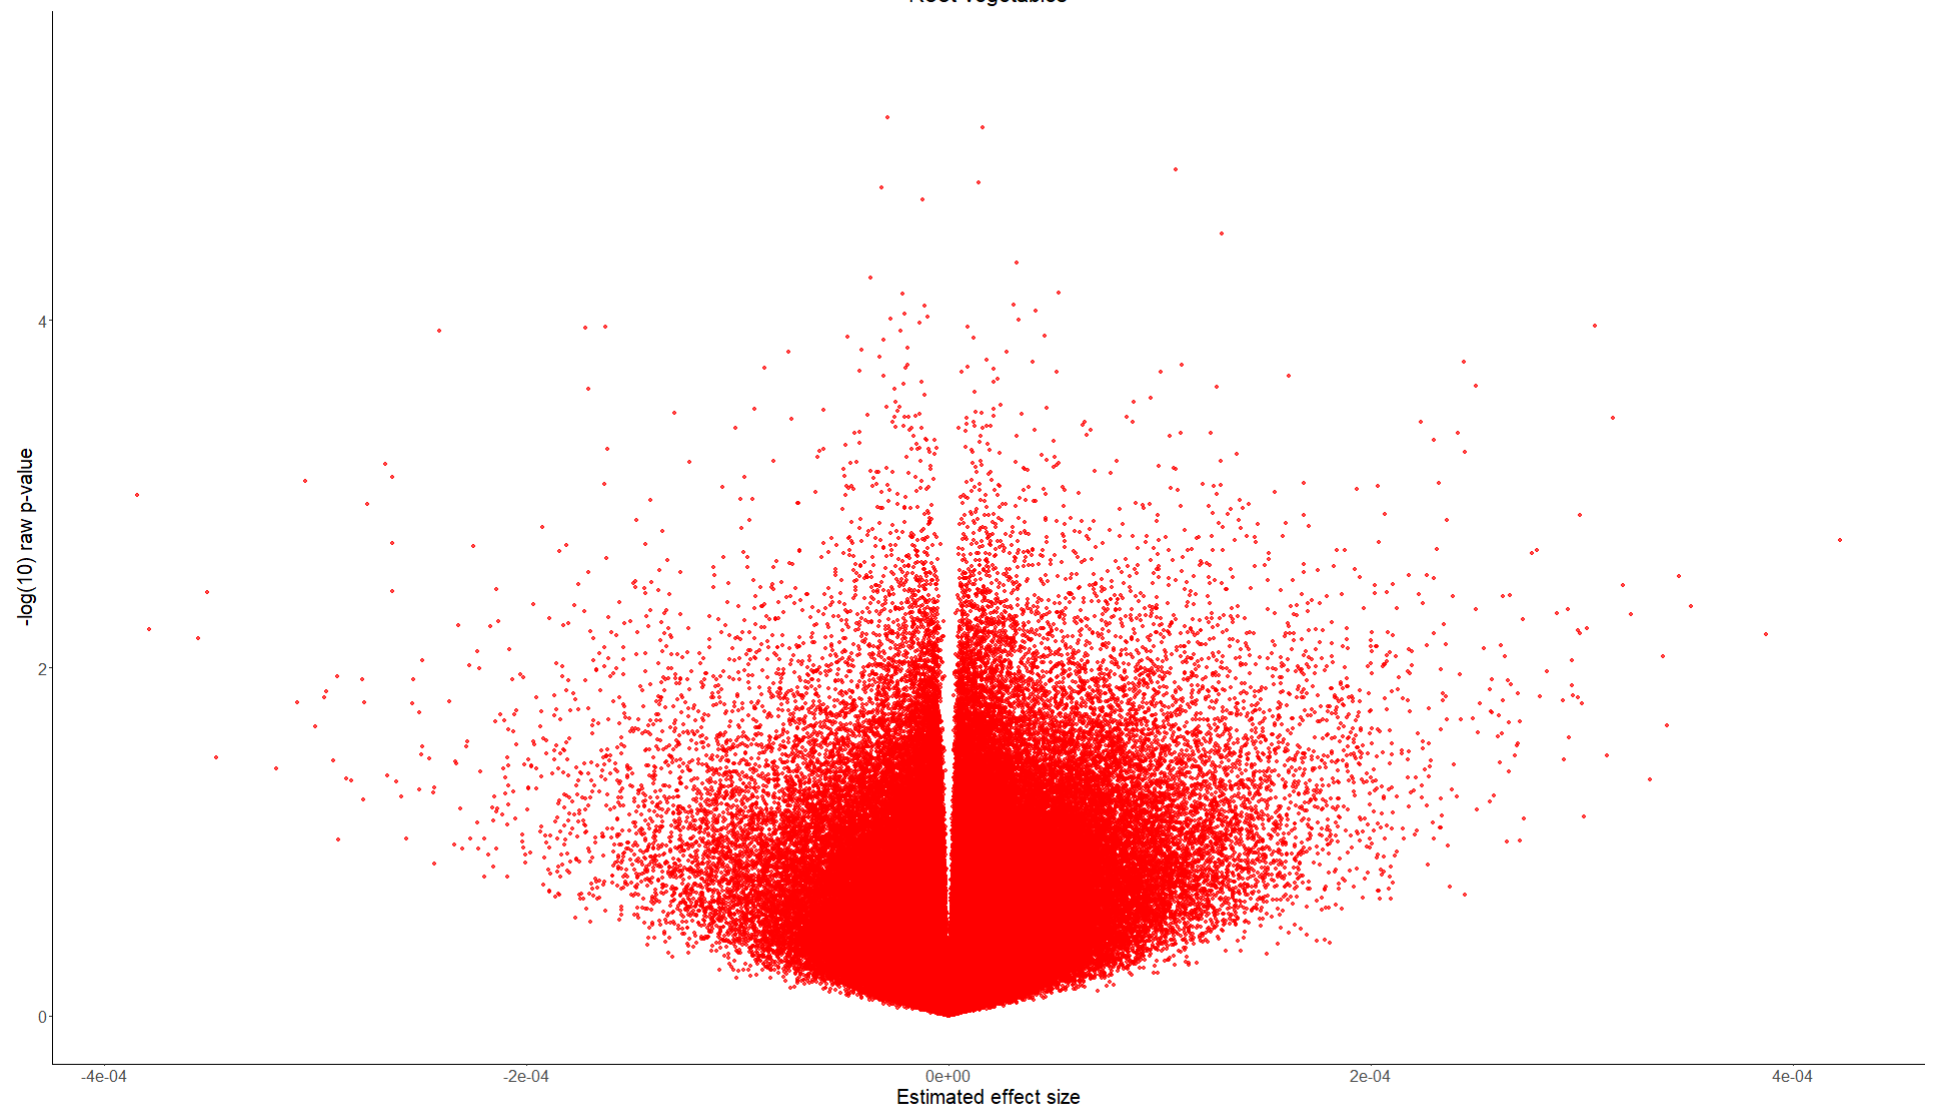

0 exceeded alpha threshold  
fdr corrected

Fig 140

# Volcano plot Spirits

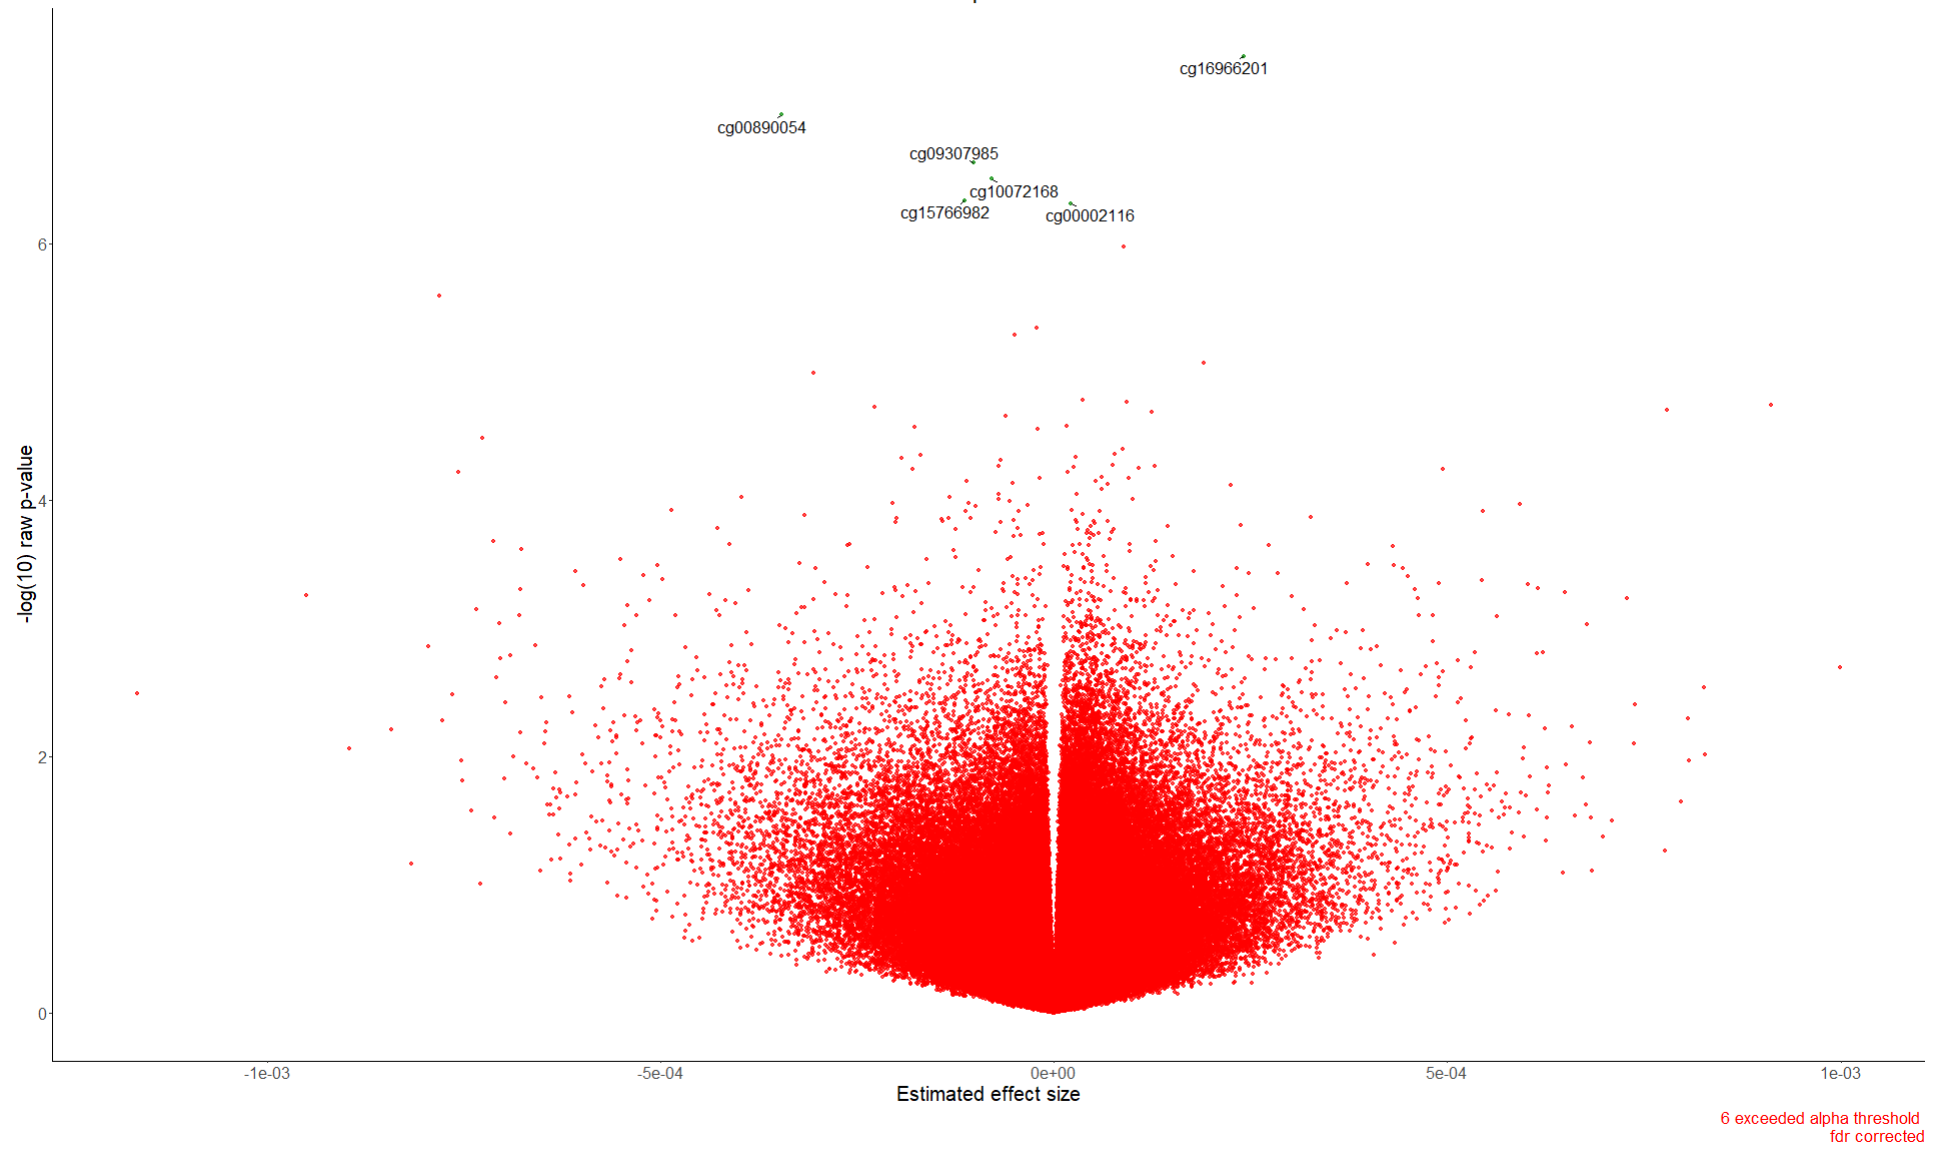

Fig 141

# Volcano plot Sugar-sweetened-beverages

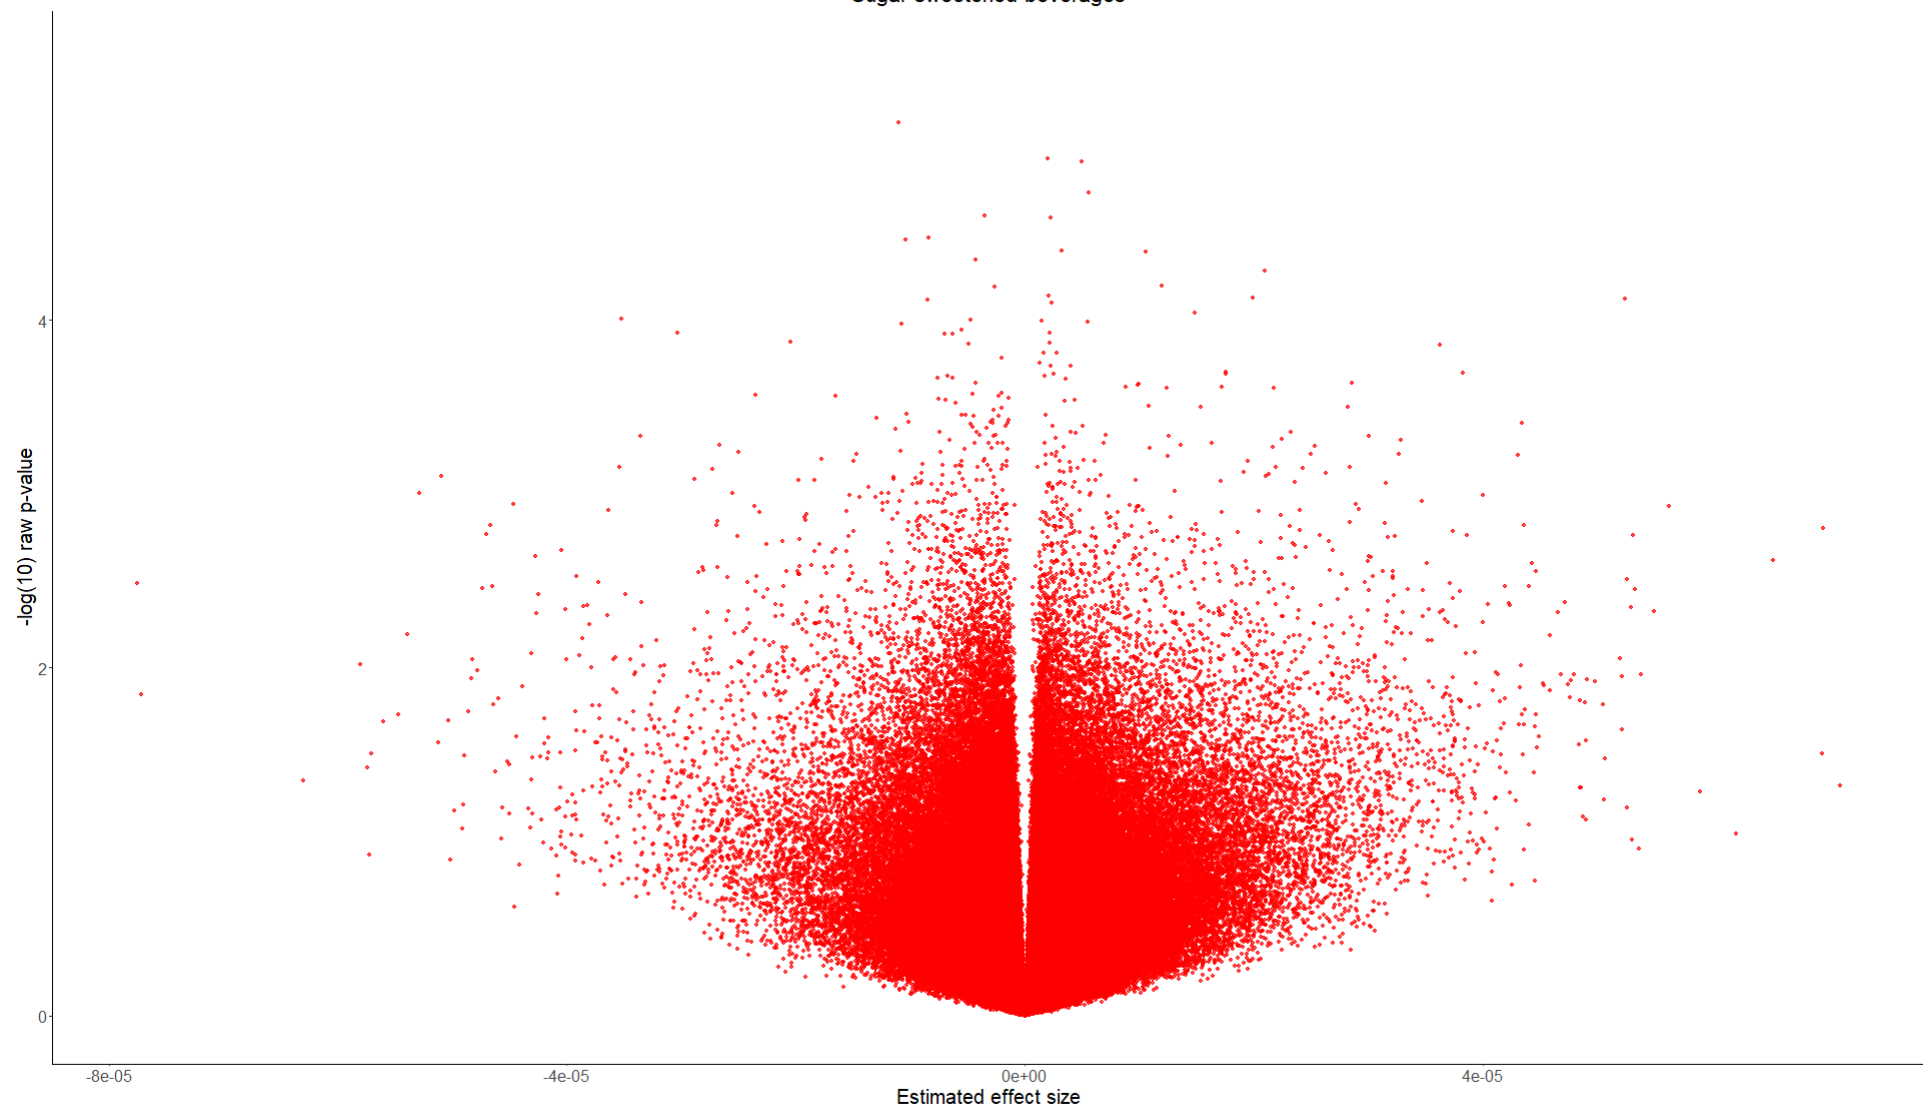

0 exceeded alpha threshold  
fdr corrected

Fig 142

Volcano plot  
Tea

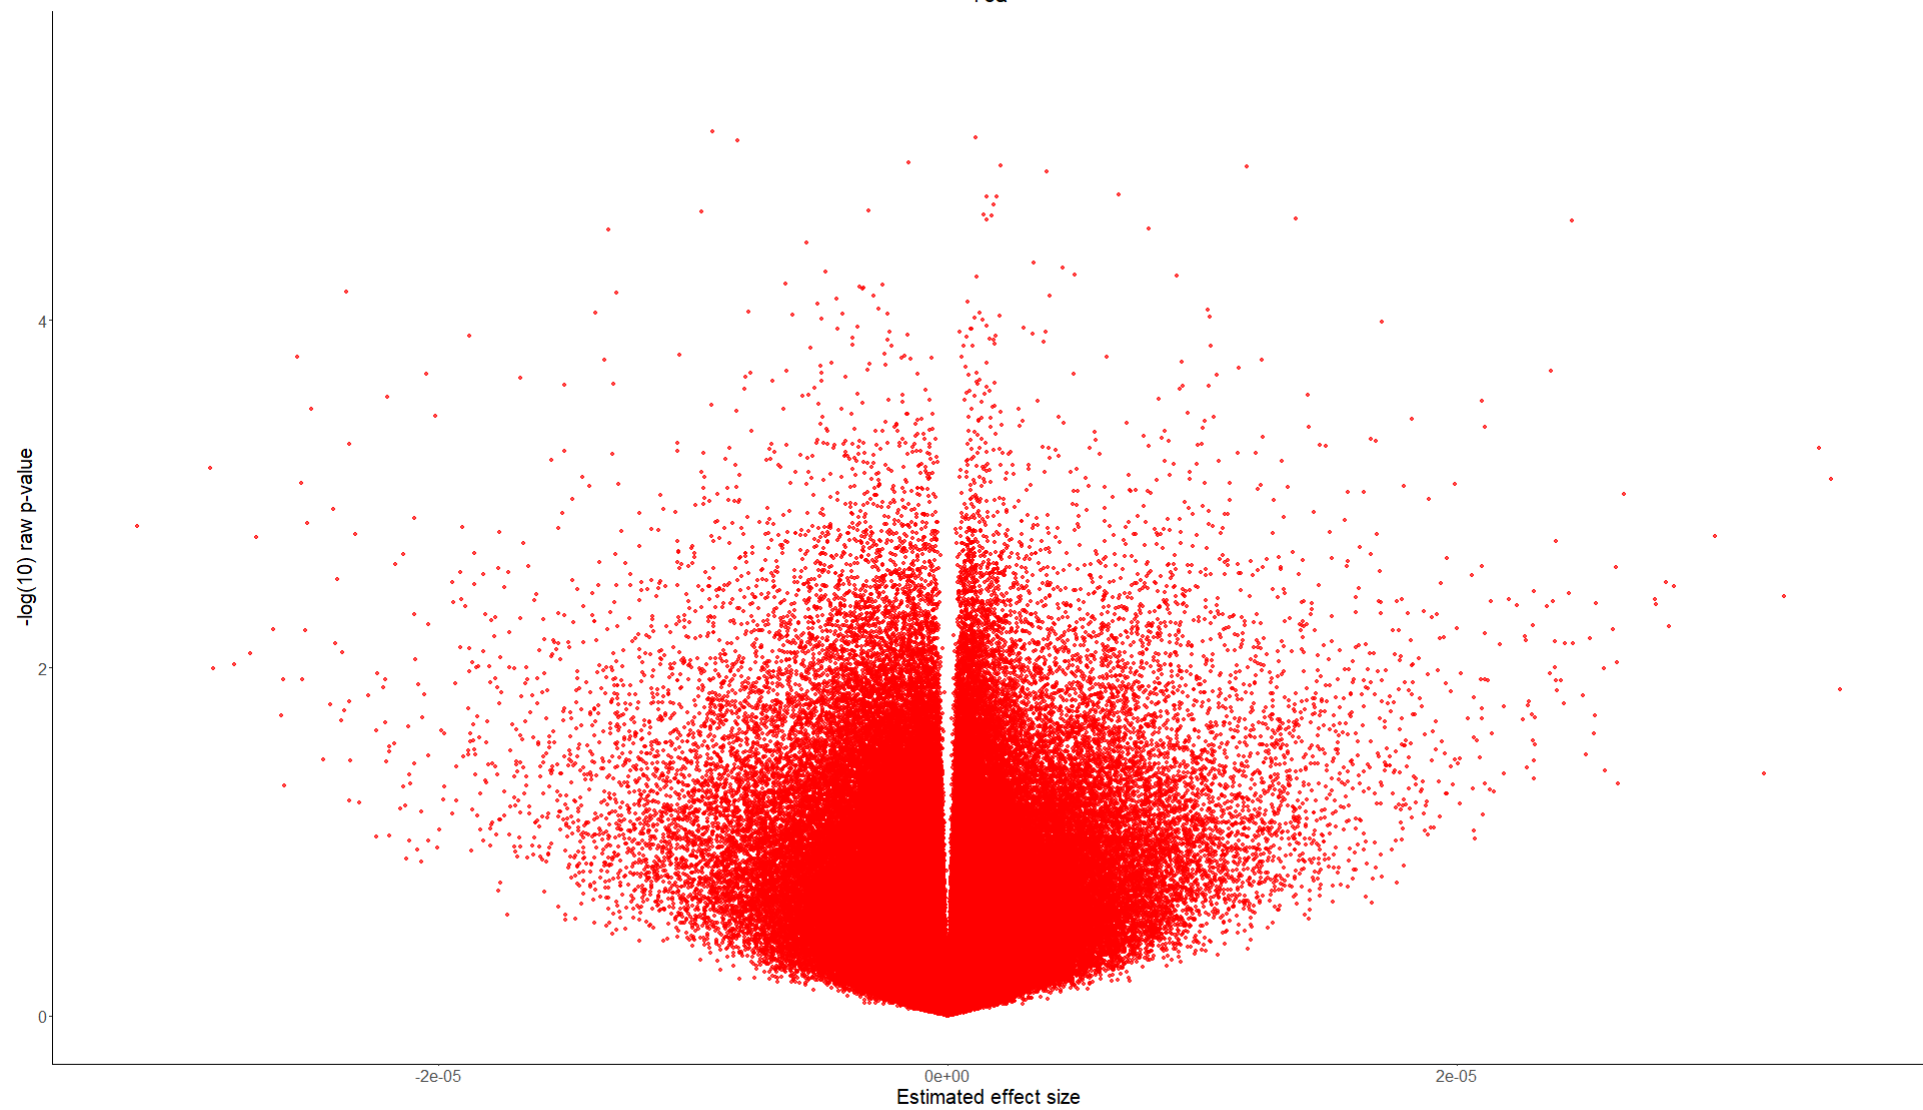

0 exceeded alpha threshold  
fdr corrected

Fig 143

Volcano plot  
Total-fish

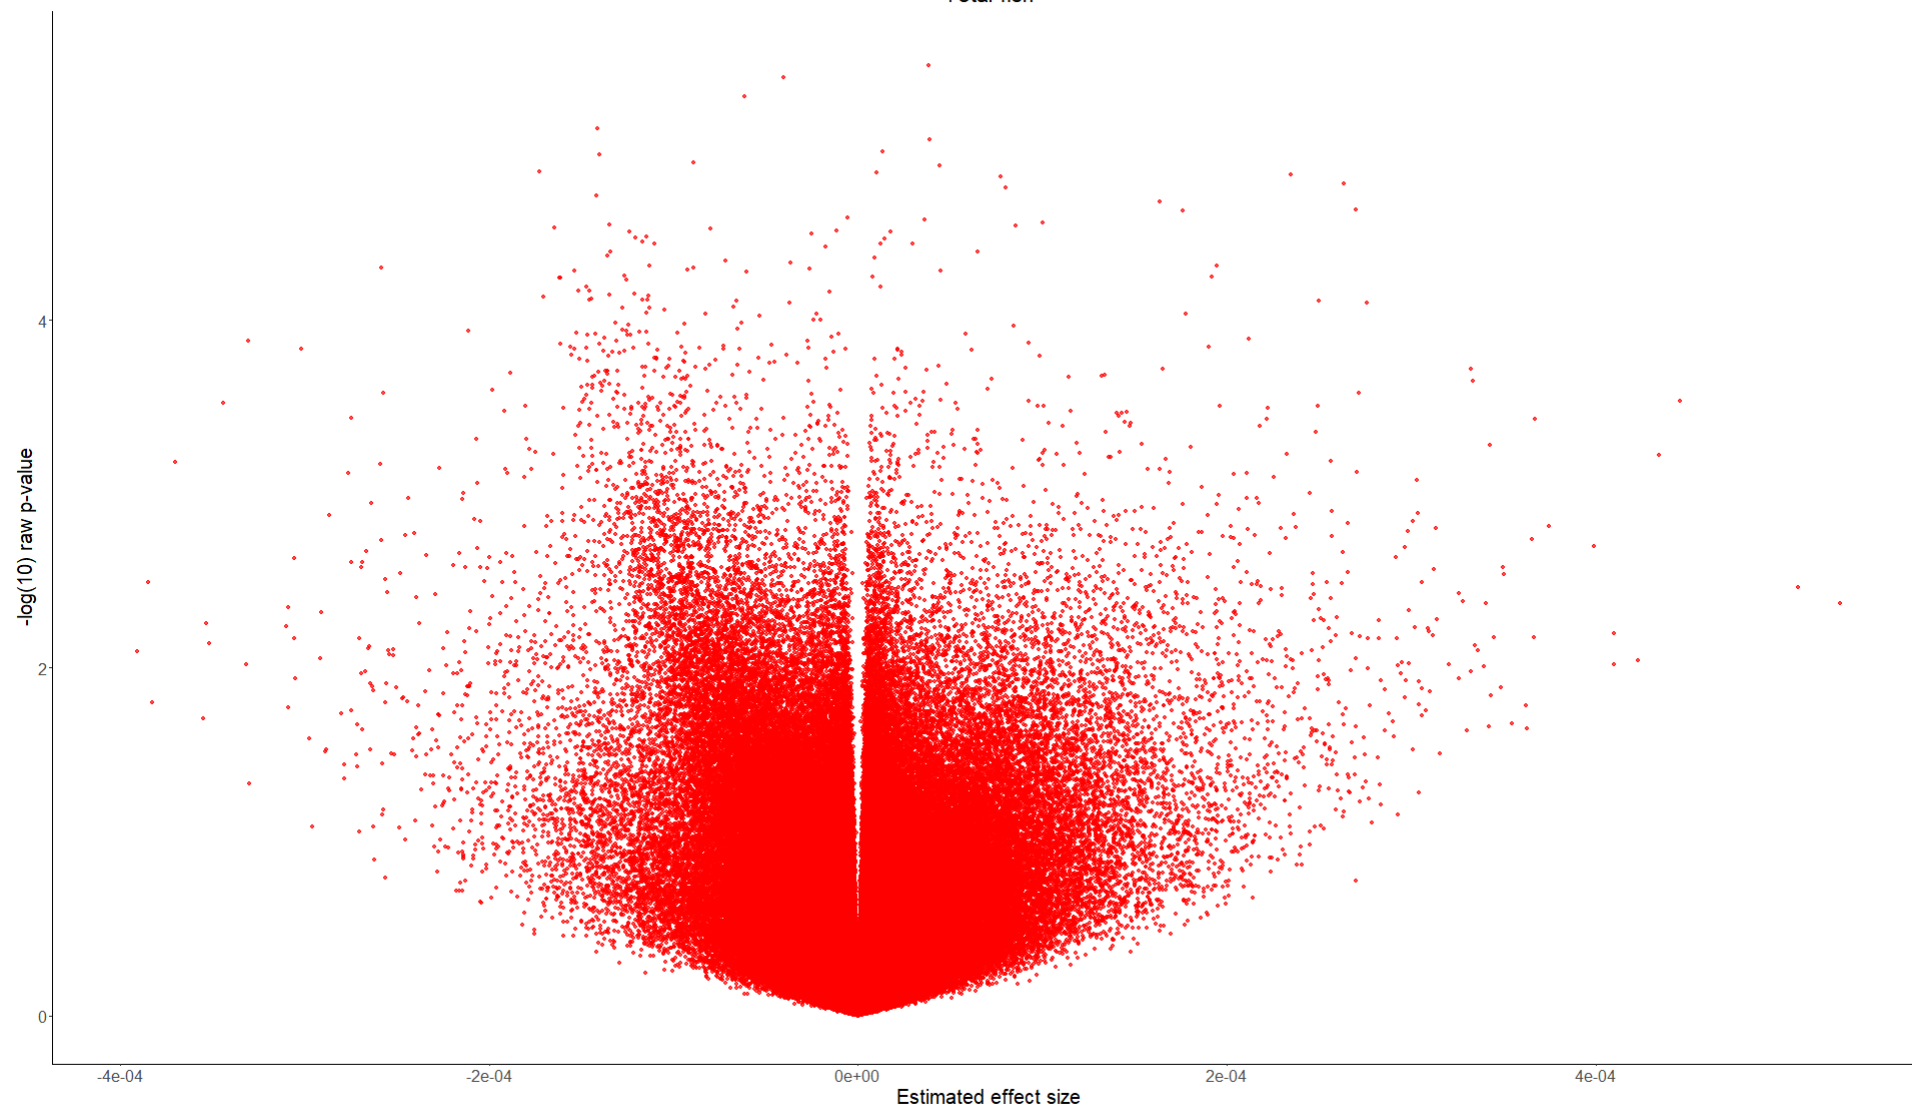

0 exceeded alpha threshold  
fdr corrected

Fig 144

Volcano plot  
Total-fruits

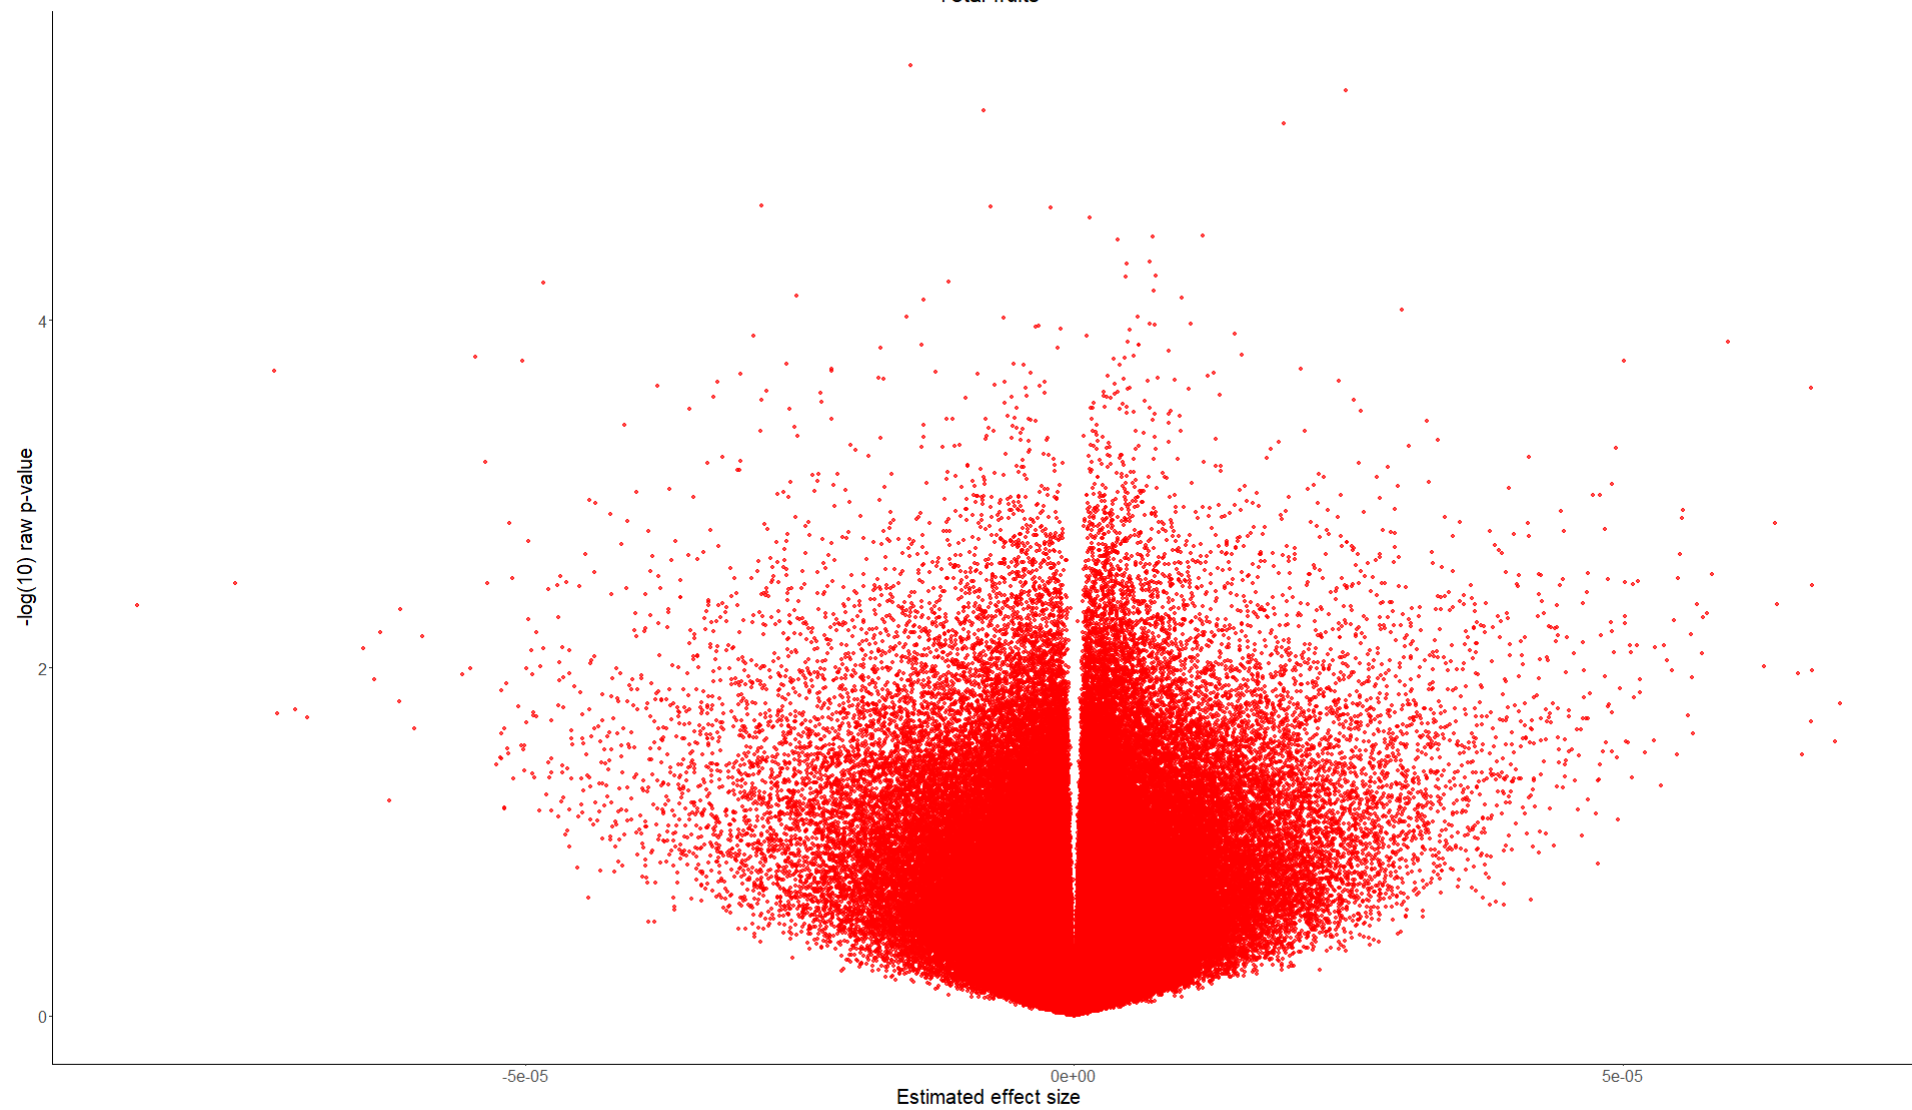

0 exceeded alpha threshold  
fdr corrected



Fig 145

Volcano plot  
Total-meat

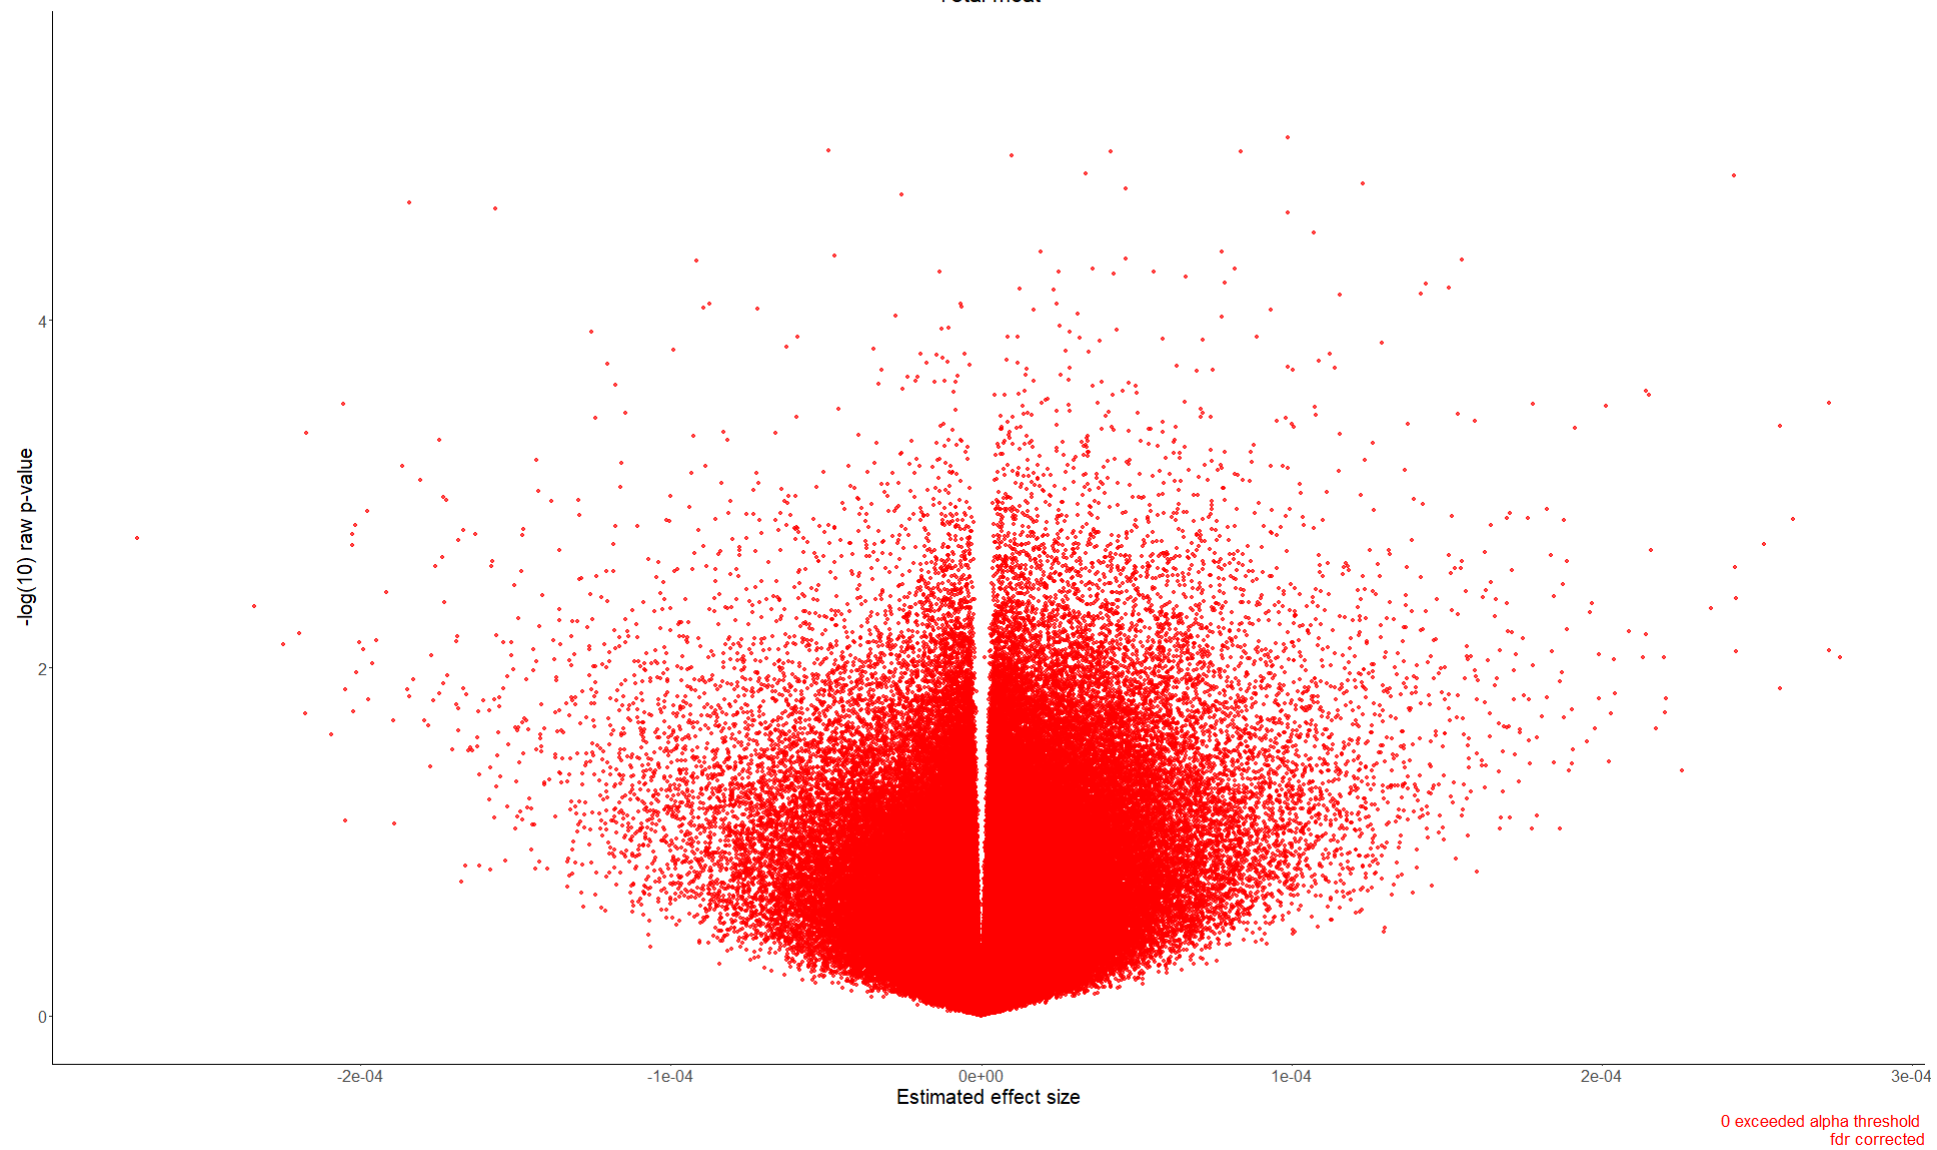

Fig 146

Volcano plot  
Total-sweets

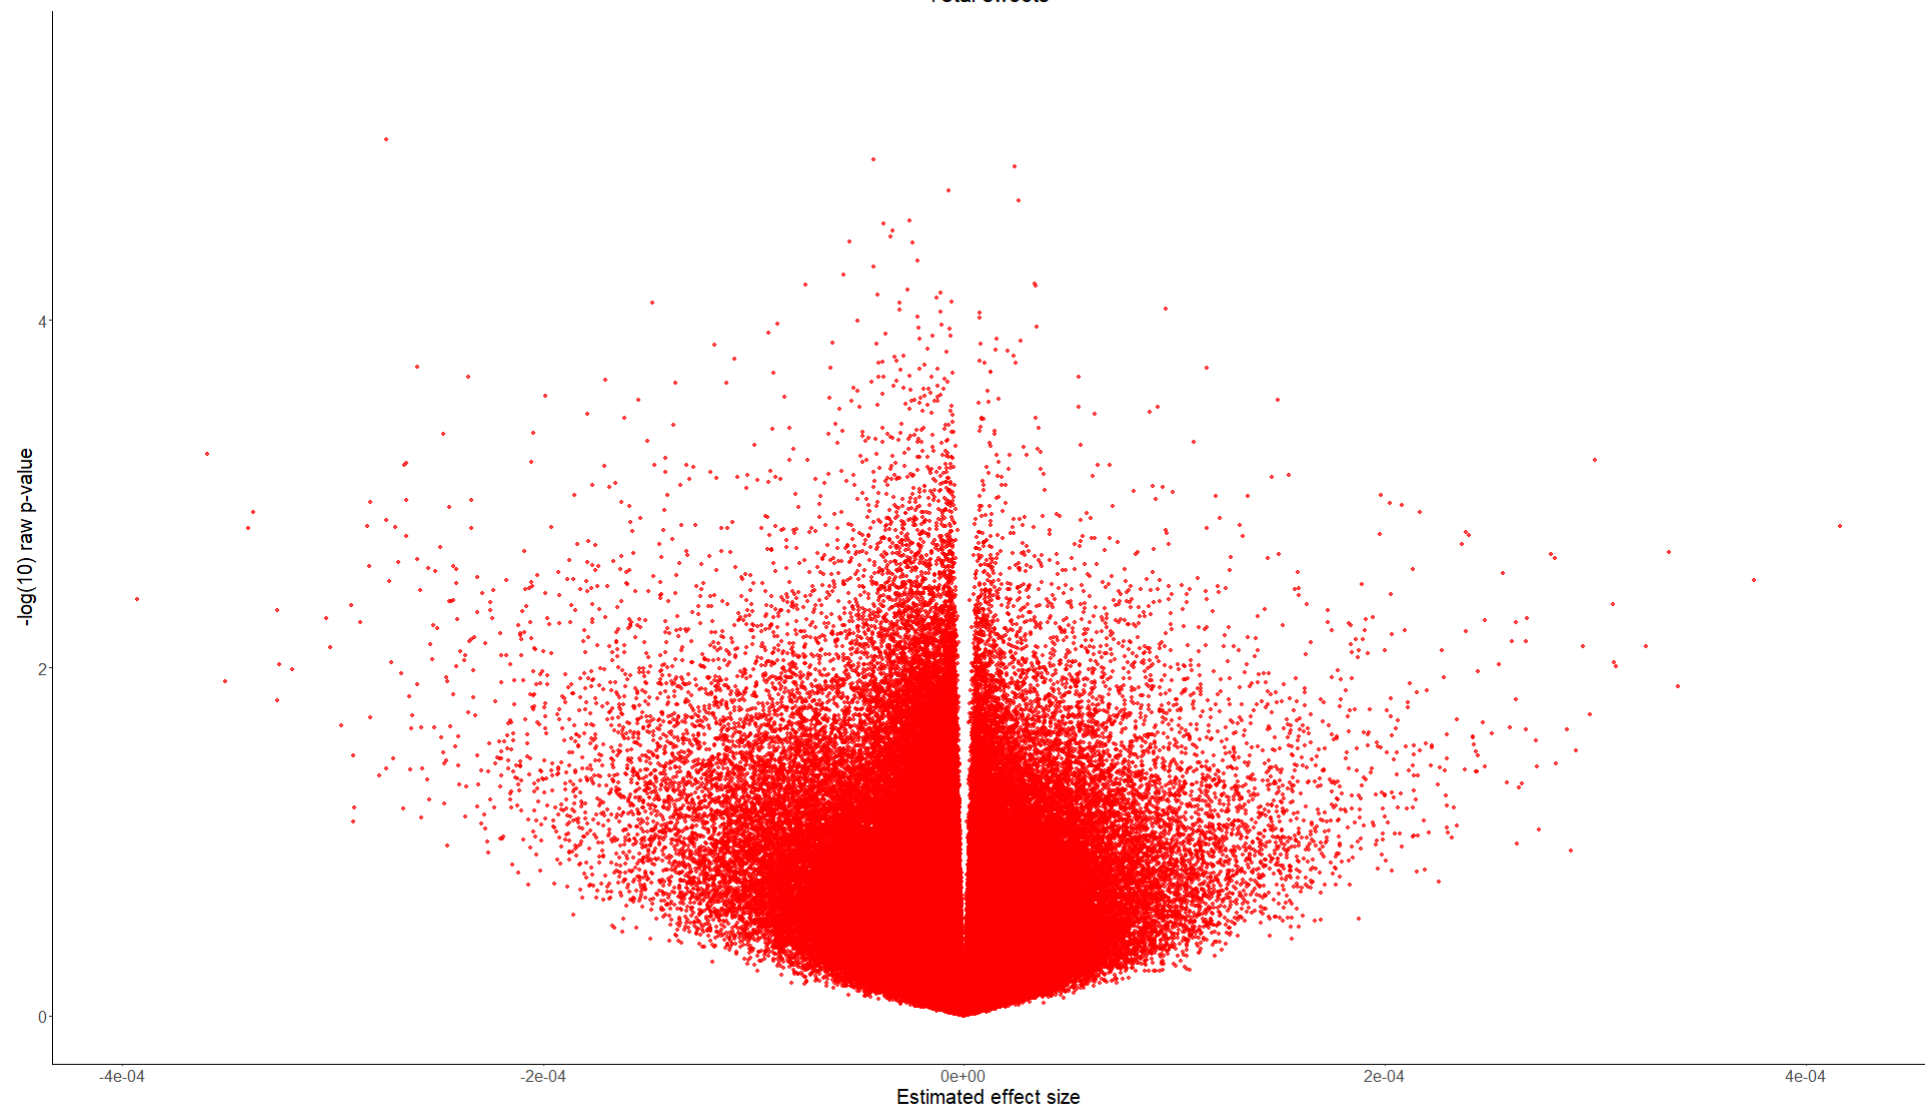

0 exceeded alpha threshold  
fdr corrected

Fig 147

Volcano plot  
Total-vegetables

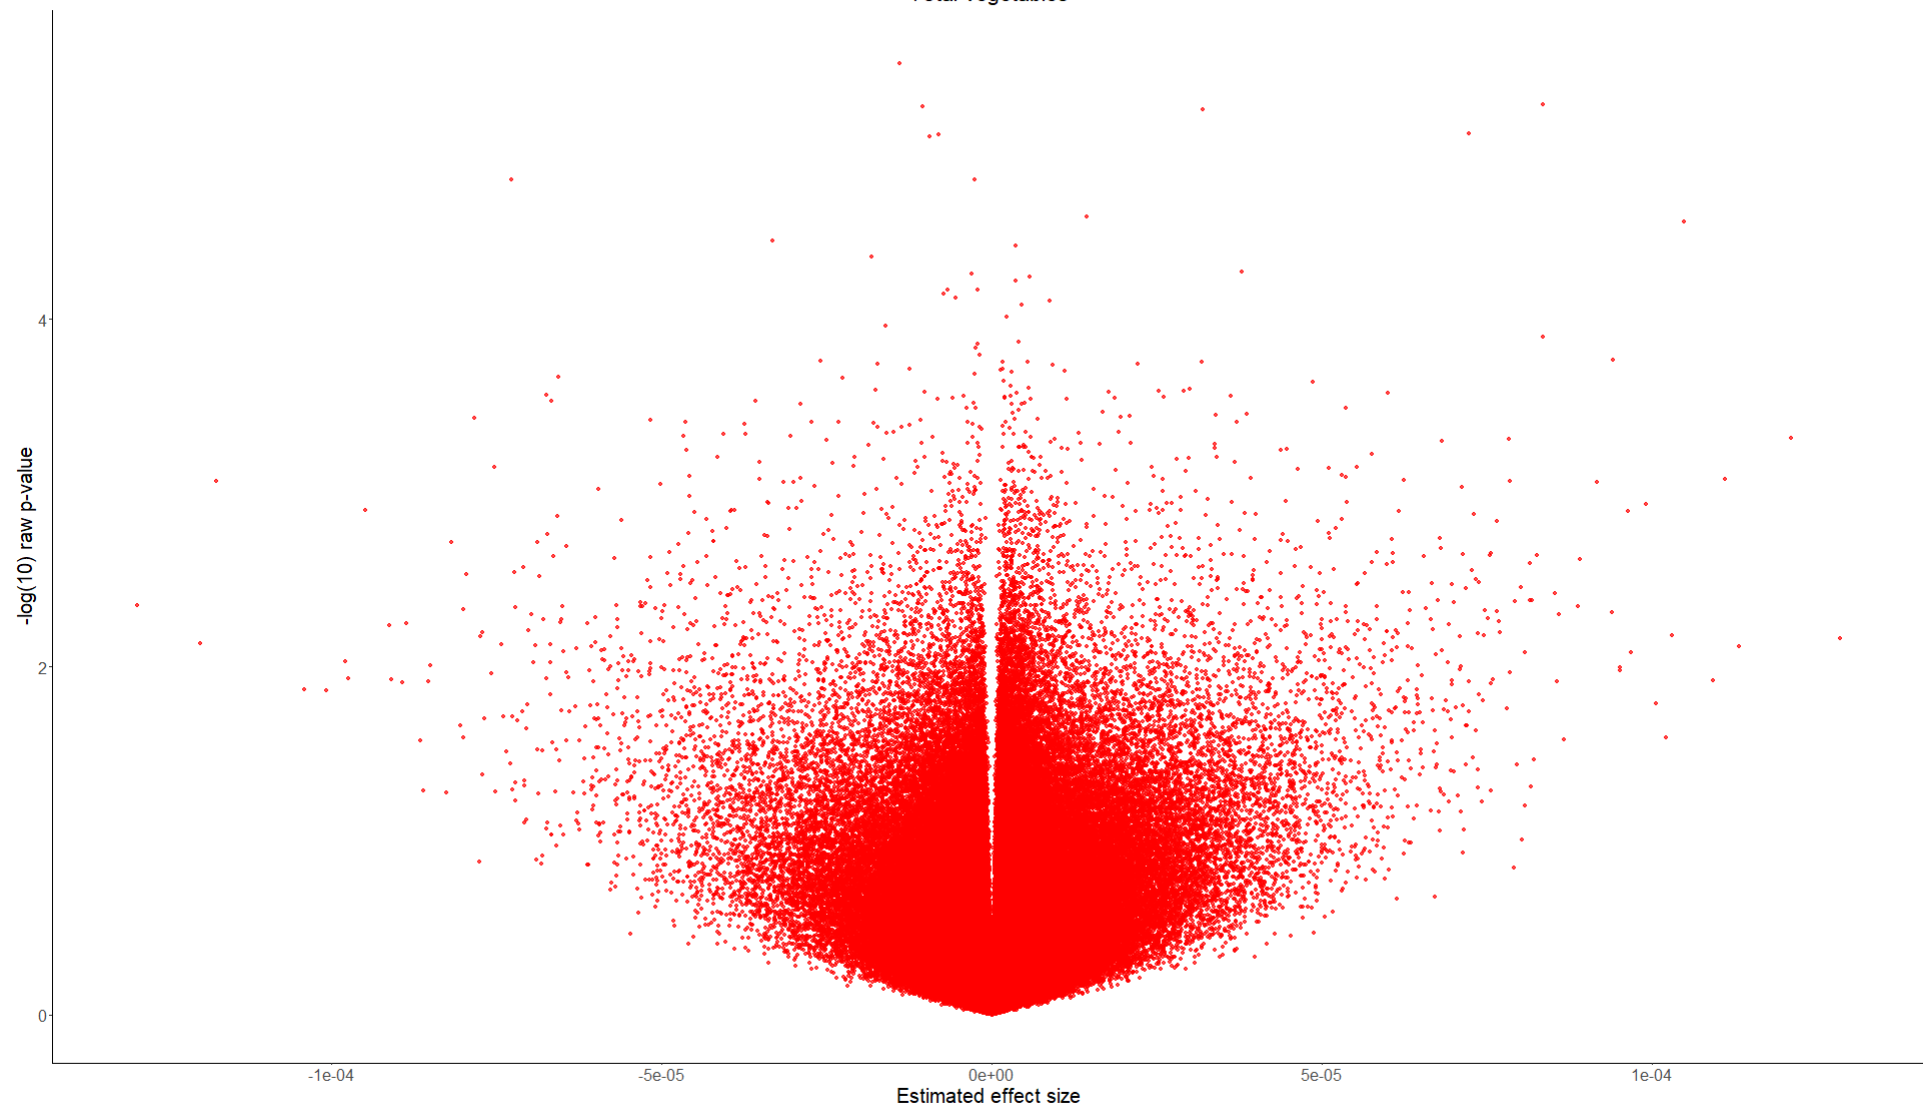

0 exceeded alpha threshold  
fdr corrected

Fig 148

# Volcano plot Whole-grain-products

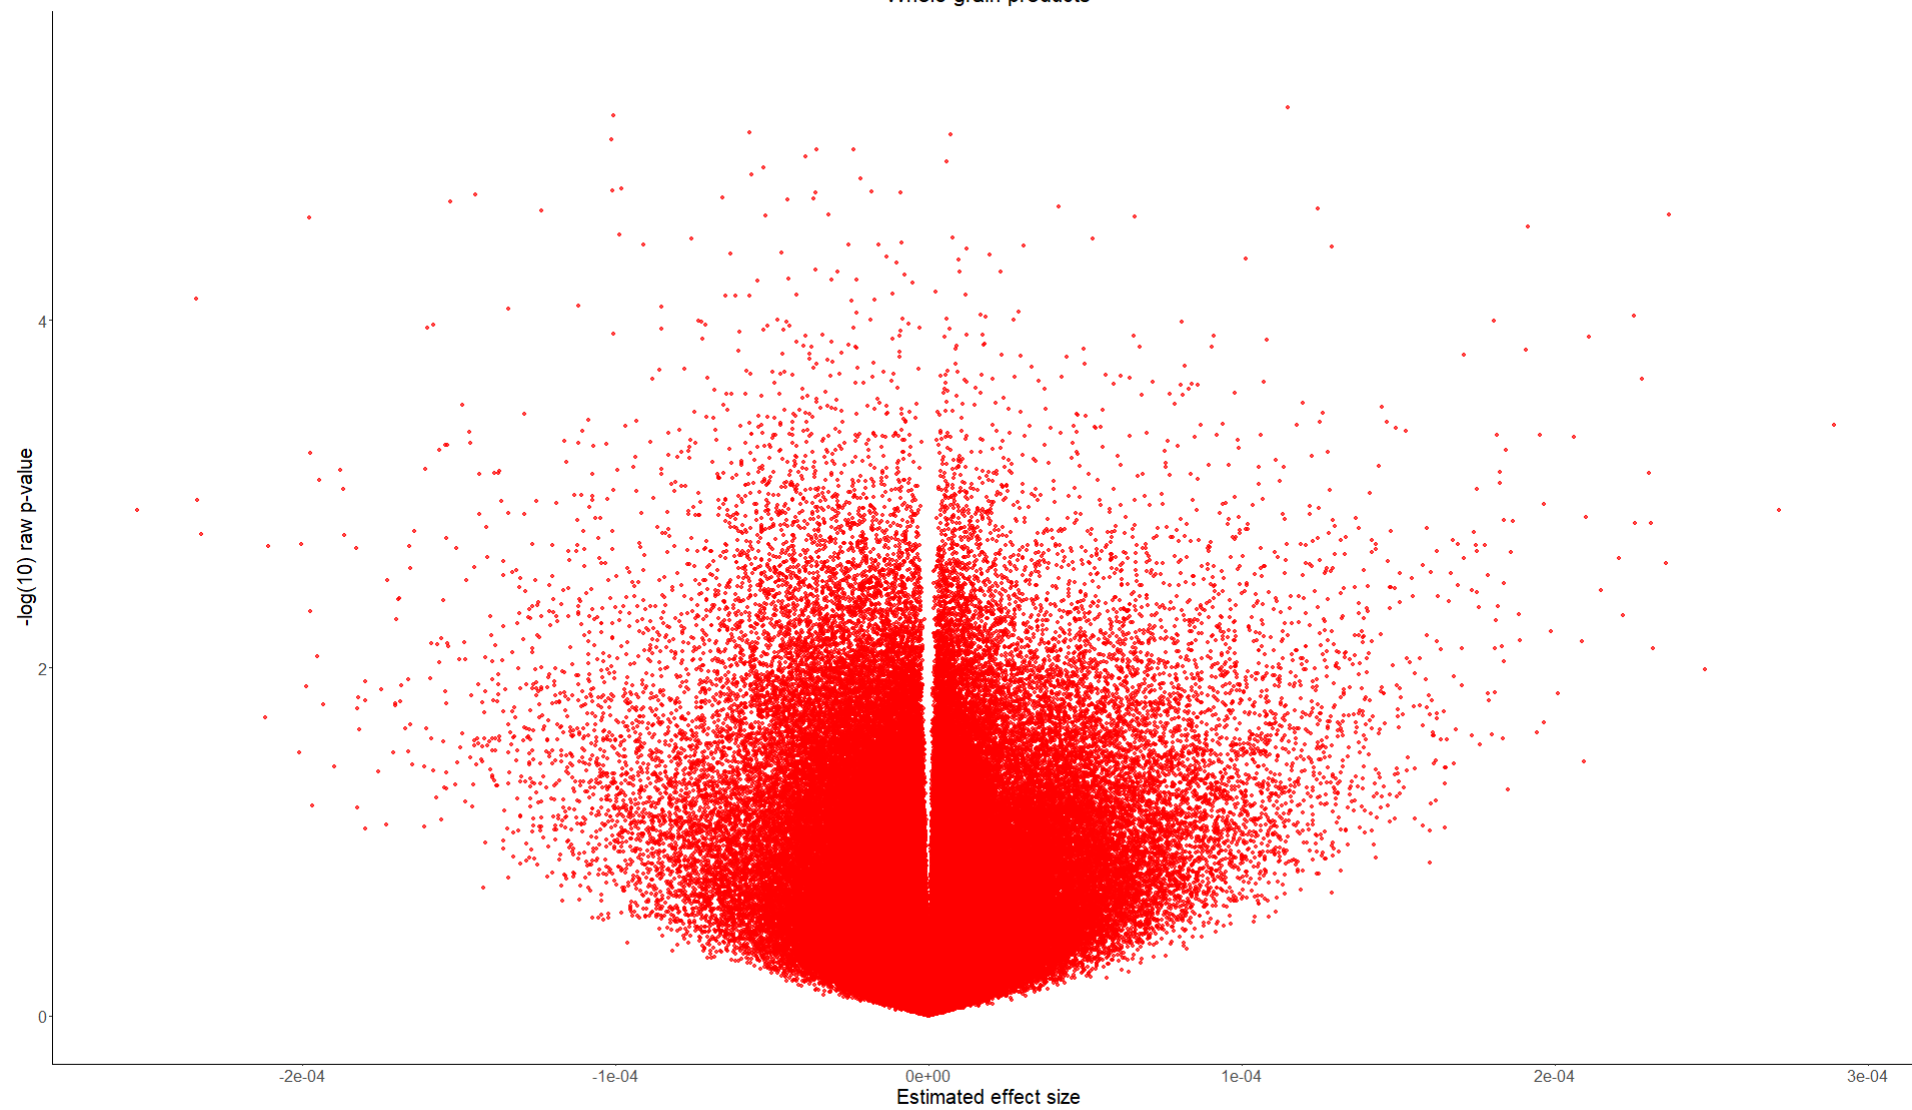

0 exceeded alpha threshold  
fdr corrected

Fig 149

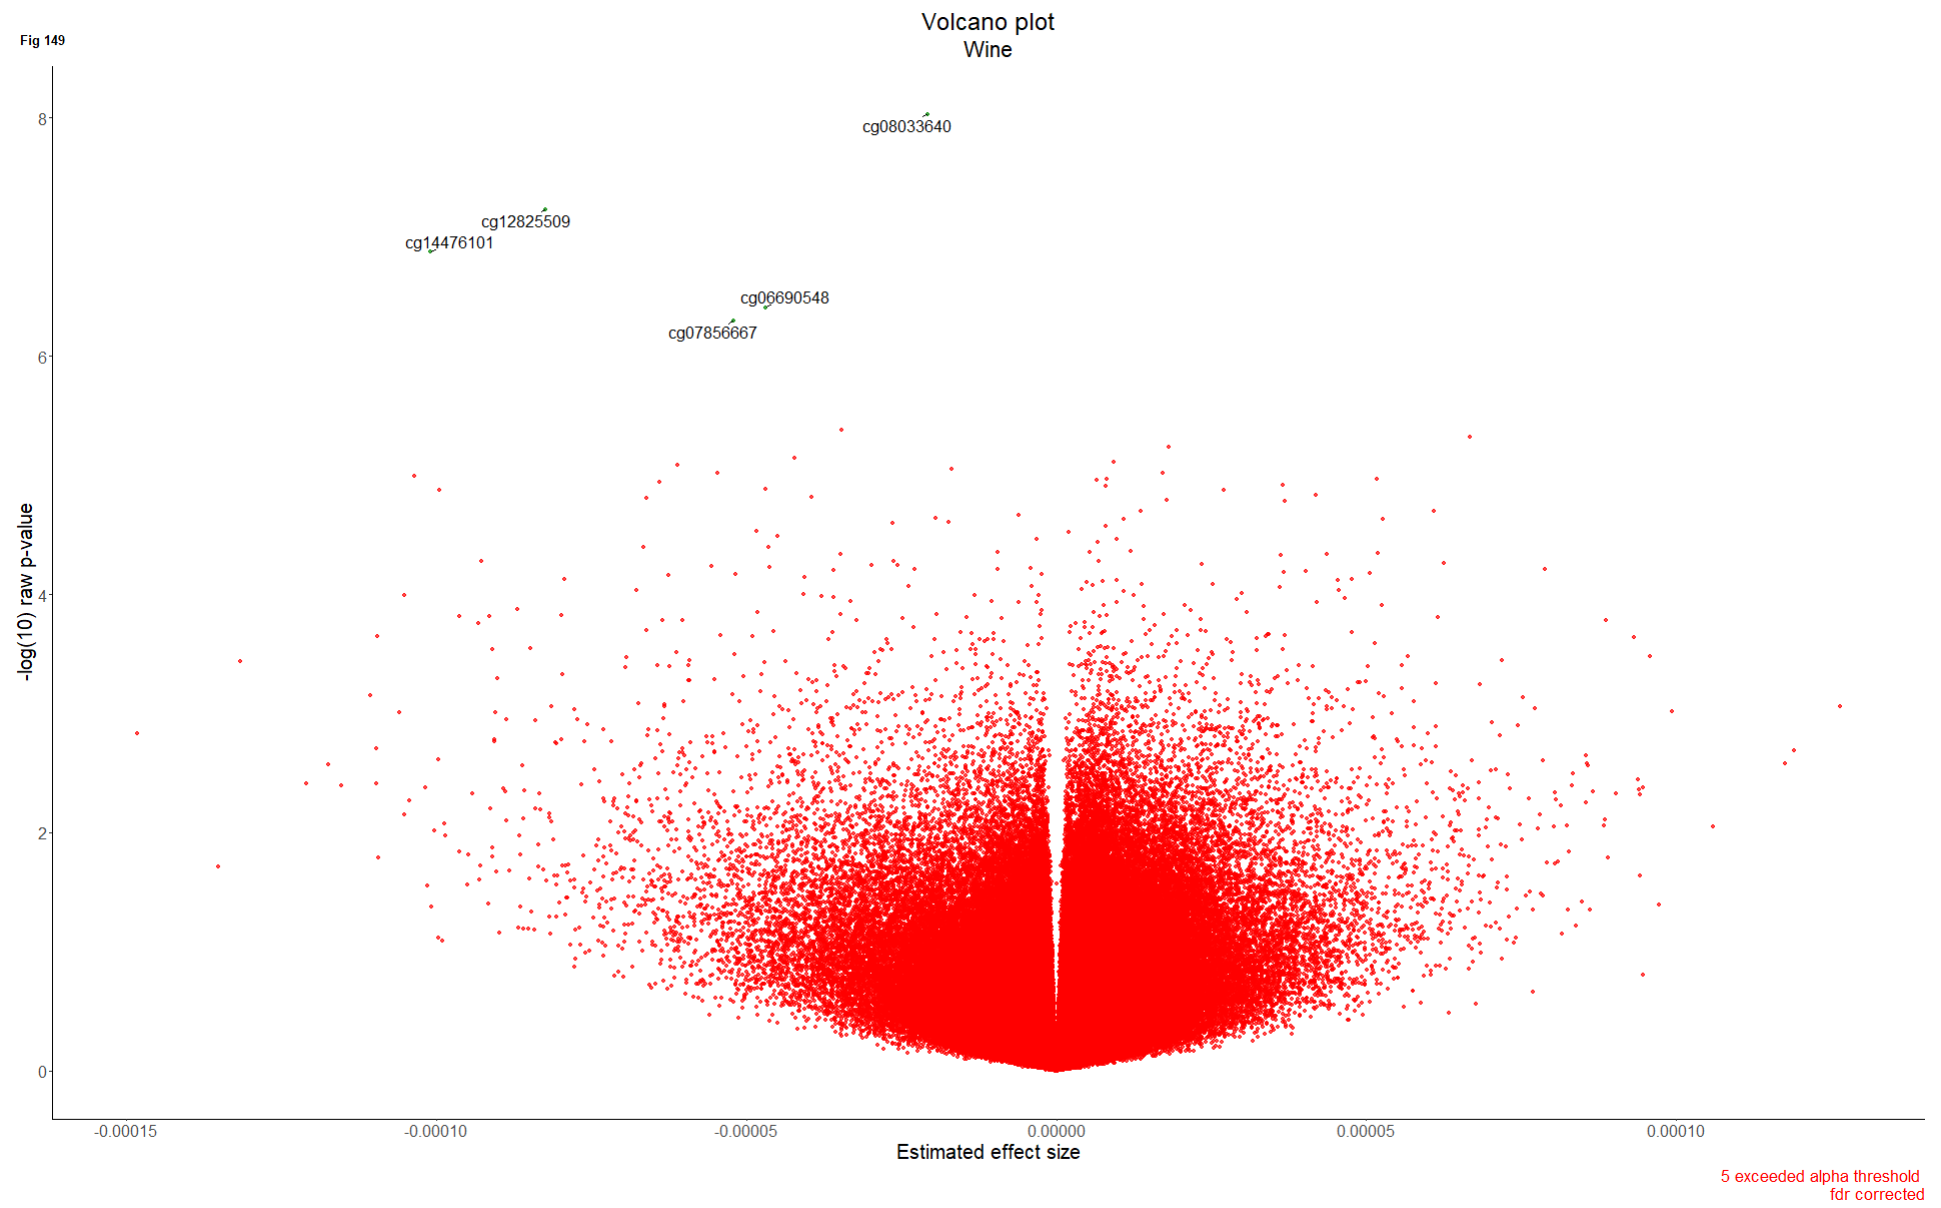

Fig 150

# Volcano plot Yogurt

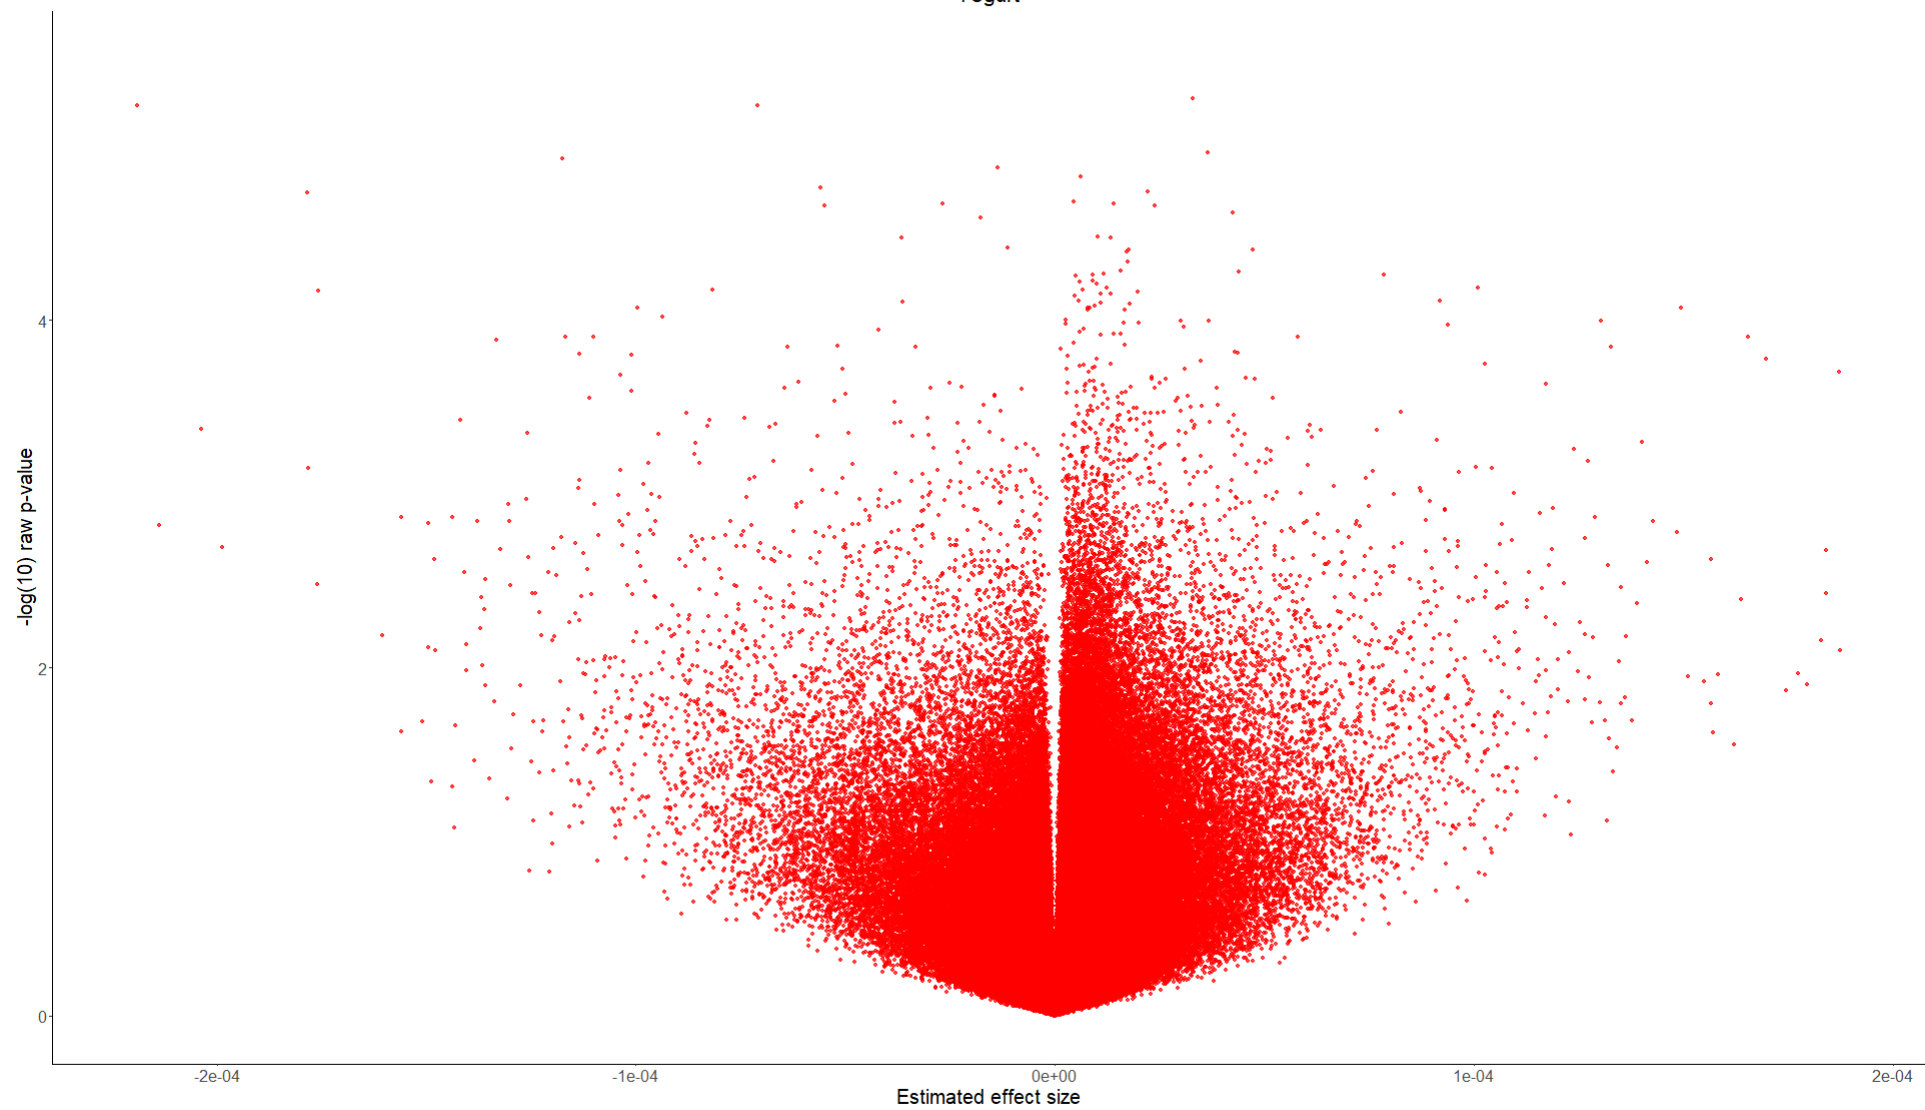

0 exceeded alpha threshold  
fdr corrected
